# Supplementary material for: Development of nanostructure–activity relationships assisting the nanomaterial hazard categorization for risk assessment and regulatory decision-making
Source: Royal Society of Chemistry journal article supplement (doi:10.1039/c6ra06159a), 2016-01-01
Supplement: c6ra06159a1.pdf [file c6ra06159a1.pdf]

1     **Development of Nanostructure-Activity Relationships Assisting the Nanomaterial**  
2     **Hazard Categorization for Risk Assessment and Regulatory Decision-Making**

3     Guangchao Chen<sup>a</sup>, Willie J.G.M. Peijnenburg<sup>a,b</sup>, Vasyl Kovalishyn<sup>c</sup>, Martina G. Vijver<sup>a</sup>

4     <sup>a</sup>Institute of Environmental Sciences CML, Leiden University, Einsteinweg 2, 2333 CC, Leiden, The  
5     Netherlands

6     <sup>b</sup>National Institute of Public Health and the Environment-RIVM, Bilthoven, The Netherlands

7     <sup>c</sup>Department of Medical and Biological Research, Institute of Bioorganic Chemistry & Petrochemistry,  
8     1 Murmanska Street, Kyiv 02660, Ukraine

9

10

11

12

13

14   Content:

15   Influence of discretization thresholds on model performances;

16   Developed global classification models;

17   Table S1. Performances of the LC50 related nano-SARs for *Danio rerio* and *Daphnia magna*;

18   Table S2. Performances of the EC50 related nano-SARs for *Daphnia magna* and *Pseudokirchneriella*  
19   *subcapitata*;

20   Table S3. Performances of the MIC related nano-SARs for *Escherichia coli* and *Staphylococcus*  
21   *aureus*;

22   Table S4. Data resources of LC50 data;

23   Table S5. Data resources of EC50 data;

24   Table S6. Data resources of MIC data;

25   Table S7. Detailed information of the LC50 data used for building nano-SARs;

26   Table S8. Detailed information of the EC50 data used for building nano-SARs;

27   Table S9. Detailed information of the MIC data used for building nano-SARs

28

## 29 **Influence of Discretization Thresholds on Model Performances**

30 Before building models, the influences of discretization thresholds on model performances were taken  
31 into consideration. For global models, a series of thresholds were chosen to examine the tendency of  
32 model predictability with the shift of thresholds. Values of the thresholds were set to be 0.1, 0.3, 0.5,  
33 0.7, 1.0, 2.0, 4.0, 6.0, 8.0, 10.0, 30, 50, 70, and 100.0 mg/L for the case studies of LC50 and EC50,  
34 and 1.0, 2.0, 4.0, 6.0, 8.0, 10.0, 50.0 and 100.0 mg/L for MIC due to a narrower variation of toxicity  
35 values. Within each dataset the records were ranked based on the values of toxicity endpoints. ENMs  
36 with toxicity values less than the threshold values were assigned to the 'active' class, and the rest of  
37 ENMs were labeled as 'inactive'. On the basis of different classification performances, the thresholds  
38 that lead to the most balanced predictive performances for both active and inactive groups were  
39 considered for the three case studies. Referring to the regulations and directives nowadays in force,  
40 choice of the thresholds for global models was restricted to the values of 0.1, 1.0, 10.0 and 100.0 mg/L,  
41 which are, for instance, used by the CLP-Regulation (EC) No 1272/2008 and the EU Directive  
42 93/67/EEC to rank the hazard effects of chemicals. As results, selected cut-off values for case studies I,  
43 II and III are respective 1, 10 and 10 mg/L, as described in Figure S1.

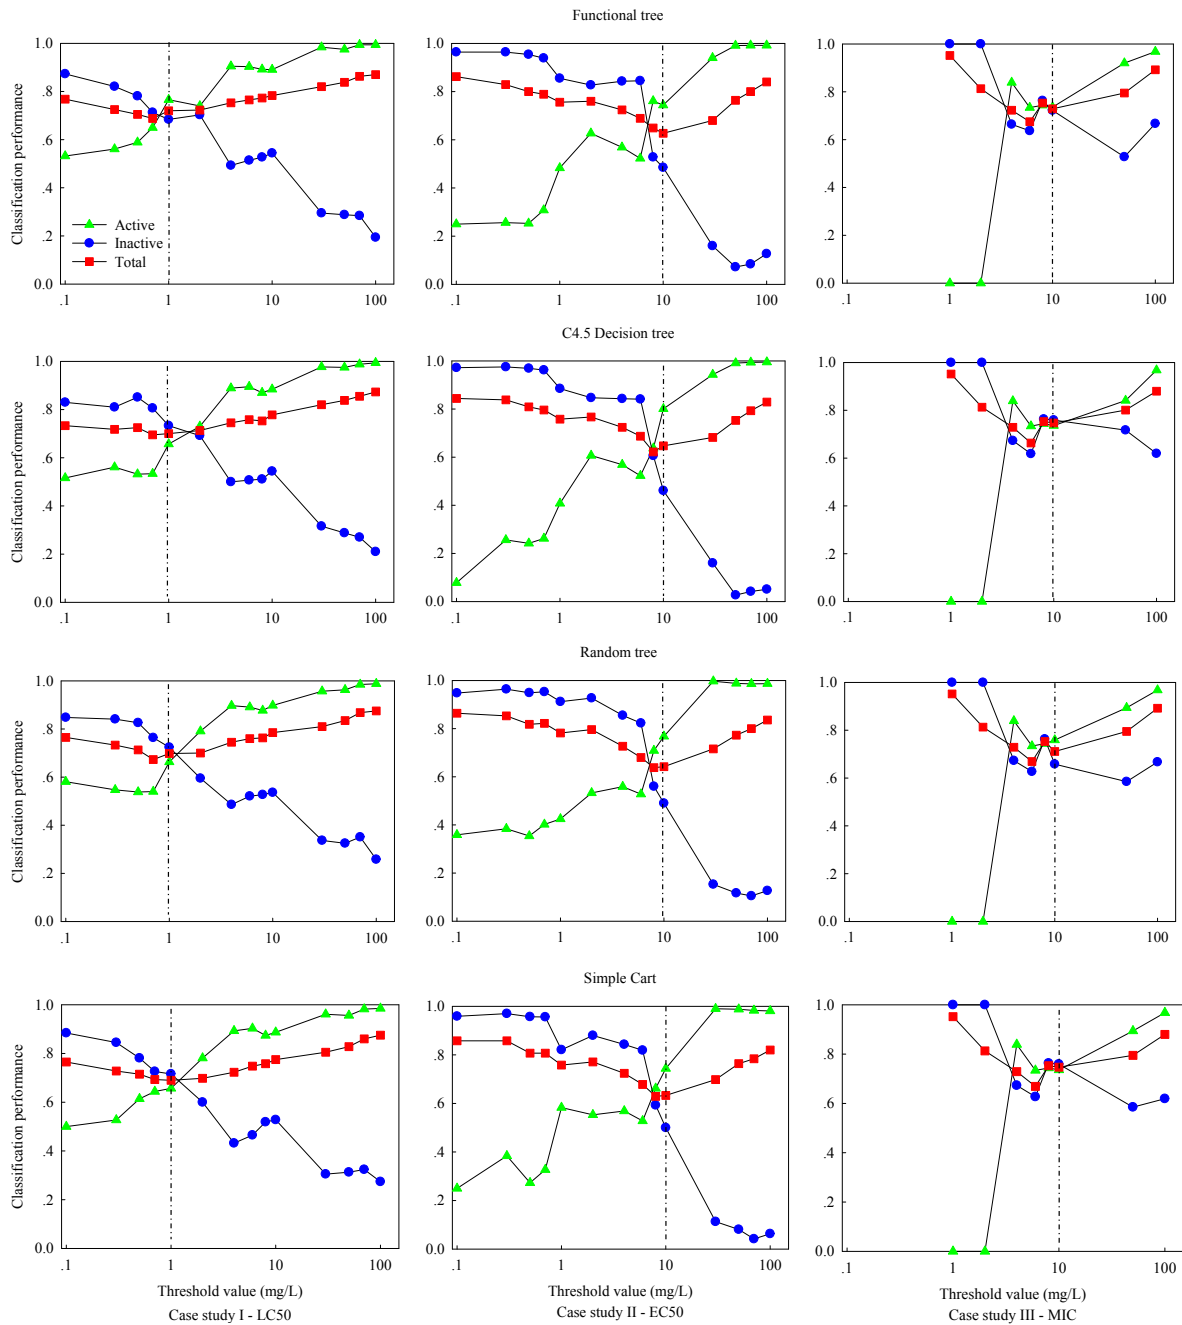

44

45 Figure S1. Effect of classification threshold values on model performances. Case study I: LC50 values of 400  
 46 ENMs, the optimal threshold value is 1 mg/L for discretizing the numerical values; Case study II: EC50 values  
 47 of 450 ENMs, the optimal threshold value is 10 mg/L; Case study III: MIC values of 166 ENMs, the optimal  
 48 threshold value is 10 mg/L.

49

## 50 Developed Global Classification Models

51 Case study I LC50:

### 52 Functional tree

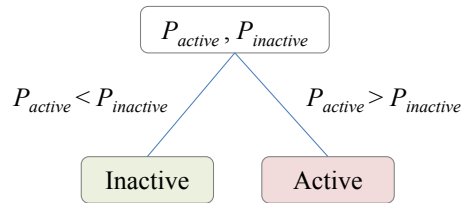

53 
$$P_{active} = \frac{\exp(f_{active})}{\exp(f_{active}) + \exp(f_{inactive})}, P_{inactive} = \frac{\exp(f_{inactive})}{\exp(f_{active}) + \exp(f_{inactive})}$$

54  $f_{active} = 2.28 - 0.07 \times [\text{tholepolarizability\_a\_zz}] - 0.01 \times [\text{volume}] - 0.03 \times [\text{polarsurfacearea}] - 0.1 \times [\text{SddTi}]$   
 55  $+ 0.14 \times [\text{SsAg}] - 15.18 \times [\text{SdAg}] - 0.63 \times [\text{Se1Al1Al1}] - 0.34 \times [\text{SsCo}] - 5.56 \times [\text{SdCa}] - 0.26 \times [\text{SsSn}] +$   
 56  $0.37 \times [\text{SsNi}] - 0.21 \times [\text{SsSe}] + 1.48 \times [\text{ALogPS\_logP}] = -f_{inactive}$

57

### 58 C4.5 decision tree

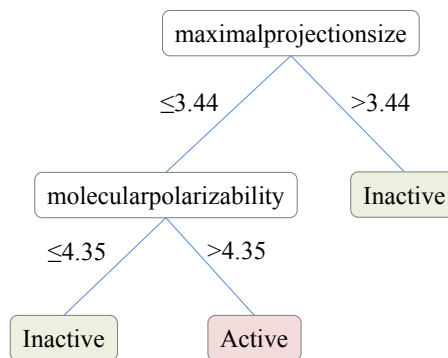

59

### 60 Random tree

61 asa\_ASA\_P < 78  
 62 | minimalprojectionarea < 10.3  
 63 | | exactmass < 82.45  
 64 | | | ALogPS\_logS < 0.45  
 65 | | | | ALogPS\_logS < 0.1 : Inactive (3/1)  
 66 | | | | ALogPS\_logS >= 0.1 : Active (2/0)  
 67 | | | | ALogPS\_logS >= 0.45 : Inactive (4/0)  
 68 | | | exactmass >= 82.45  
 69 | | | maximalprojectionradius < 3.01  
 70 | | | | wienerindex < 0.5  
 71 | | | | | ALogPS\_logP < -1.31  
 72 | | | | | ALogPS\_logS < 0.1  
 73 | | | | | | ALogPS\_logS < 0.02 : Active (4/1)  
 74 | | | | | | ALogPS\_logS >= 0.02 : Active (7/0)  
 75 | | | | | | ALogPS\_logS >= 0.1  
 76 | | | | | | ALogPS\_logS < 0.13 : Inactive (1/0)  
 77 | | | | | | ALogPS\_logS >= 0.13  
 78 | | | | | | ALogPS\_logS < 0.31 : Active (1/0)

```

79 | | | | | | | | | | ALogPS_logS >= 0.31
80 | | | | | | | | | | ALogPS_logS < 0.86
81 | | | | | | | | | | ALogPS_logS < 0.64 : Inactive (17/8)
82 | | | | | | | | | | ALogPS_logS >= 0.64 : Active (31/15)
83 | | | | | | | | | | ALogPS_logS >= 0.86 : Inactive (1/0)
84 | | | | | | | | | | ALogPS_logP >= -1.31 : Active (15/0)
85 | | | | | | | | | | wienerindex >= 0.5 : Active (18/8)
86 | | | | | | | | | | maximalprojectionradius >= 3.01
87 | | | | | | | | | | logd < -0.87 : Active (1/0)
88 | | | | | | | | | | logd >= -0.87 : Active (57/16)
89 | | | | | | | | | | minimalprojectionarea >= 10.3 : Inactive (8/0)
90 | | | | | | | | | | asa_ASA_P >= 78
91 | | | | | | | | | | asa_ASA- < 89.7
92 | | | | | | | | | | tholepolarizability_a_xx < 5.05
93 | | | | | | | | | | tholepolarizability_a_xx < 3.26 : Inactive (2/0)
94 | | | | | | | | | | tholepolarizability_a_xx >= 3.26
95 | | | | | | | | | | exactmass < 101.45
96 | | | | | | | | | | maximalprojectionradius < 2.45
97 | | | | | | | | | | minimalprojectionradius < 1.68 : Active (4/2)
98 | | | | | | | | | | minimalprojectionradius >= 1.68 : Inactive (40/12)
99 | | | | | | | | | | maximalprojectionradius >= 2.45
100 | | | | | | | | | | minimalprojectionradius < 1.67 : Inactive (4/0)
101 | | | | | | | | | | minimalprojectionradius >= 1.67 : Inactive (22/9)
102 | | | | | | | | | | exactmass >= 101.45 : Active (2/0)
103 | | | | | | | | | | tholepolarizability_a_xx >= 5.05 : Active (1/0)
104 | | | | | | | | | | asa_ASA- >= 89.7
105 | | | | | | | | | | molecularpolarizability < 6.67
106 | | | | | | | | | | chainbondcount < 1.5 : Inactive (3/0)
107 | | | | | | | | | | chainbondcount >= 1.5
108 | | | | | | | | | | minimalprojectionradius < 2.49
109 | | | | | | | | | | dreidingenergy < 61.85 : Inactive (2/0)
110 | | | | | | | | | | dreidingenergy >= 61.85
111 | | | | | | | | | | chainatomcount < 4 : Inactive (43/6)
112 | | | | | | | | | | chainatomcount >= 4 : Inactive (8/1)
113 | | | | | | | | | | minimalprojectionradius >= 2.49 : Inactive (8/2)
114 | | | | | | | | | | molecularpolarizability >= 6.67 : Inactive (11/0)
115

```

116 *Simple CART*

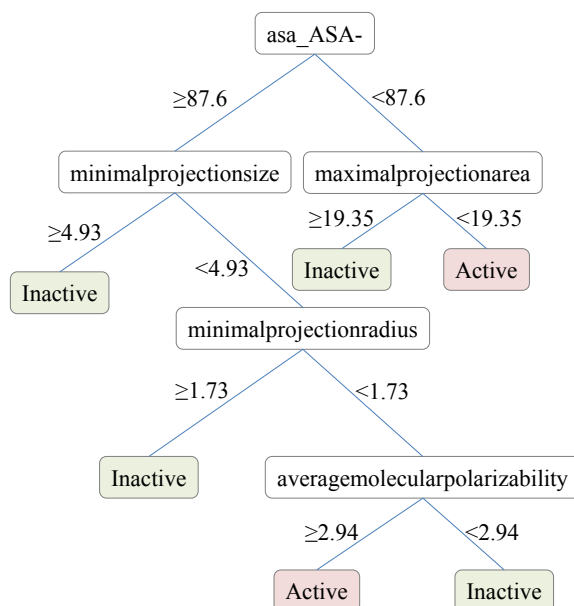

117

118 Case study II EC50:

119 Functional tree

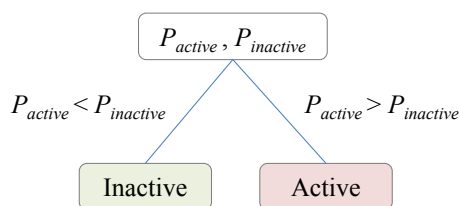

120

$$P_{active} = \frac{\exp(f_{active})}{\exp(f_{active}) + \exp(f_{inactive})}, P_{inactive} = \frac{\exp(f_{inactive})}{\exp(f_{active}) + \exp(f_{inactive})}$$

121  $f_{active} = 0.46 - 0.22 \times [\text{rotatablebondcount}] - 0.11 \times [\text{SsAg}] - 0.35 \times [\text{Se2Ni1O1}] + 0.49 \times [\text{Se1Au1Au1}] -$   
122  $0.44 \times [\text{SdsDy}] + 0.61 \times [\text{Se1Er2O2ds}] - 0.6 \times [\text{SsFe}] + 0.23 \times [\text{SsAl}] + 0.18 \times [\text{SdsSb}] = -f_{inactive}$

123

124 C4.5 decision tree

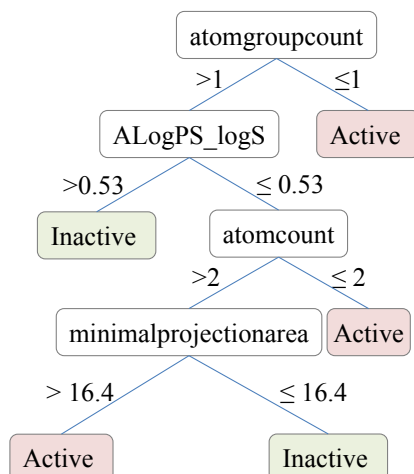

125

126 Random tree

127 balabanindex < 1.32  
128 | molecularpolarizability < 4.33  
129 | | maximalprojectionarea < 13.35  
130 | | | logp < -0.65  
131 | | | | minimalprojectionarea < 7.07 : Inactive (1/0)  
132 | | | | minimalprojectionarea >= 7.07 : Active (66/31)  
133 | | | | logp >= -0.65  
134 | | | | minimalprojectionsize < 4.73 : Active (59/29)  
135 | | | | minimalprojectionsize >= 4.73 : Active (2/0)  
136 | | | maximalprojectionarea >= 13.35 : Inactive (5/0)  
137 | | molecularpolarizability >= 4.33  
138 | | | minimalprojectionsize < 6.45  
139 | | | | maximalprojectionsize < 0.9  
140 | | | | | ALogPS\_logS < -0.03 : Active (16/6)  
141 | | | | | ALogPS\_logS >= -0.03  
142 | | | | | | ALogPS\_logS < 0.7  
143 | | | | | | | ALogPS\_logP < -1.11  
144 | | | | | | | | ALogPS\_logS < 0.31 : Active (3/0)

145 | | | | | | | | ALogPS\_logS >= 0.31  
146 | | | | | | | | ALogPS\_logS < 0.54 : Active (34/4)  
147 | | | | | | | | ALogPS\_logS >= 0.54 : Active (1/0)  
148 | | | | | | | | ALogPS\_logP >= -1.11 : Active (8/2)  
149 | | | | | | | | ALogPS\_logS >= 0.7  
150 | | | | | | | | ALogPS\_logS < 0.95 : Active (24/8)  
151 | | | | | | | | ALogPS\_logS >= 0.95 : Active (3/0)  
152 | | | | maximalprojectionsize >= 0.9  
153 | | | | maximalprojectionradius < 3.19 : Active (12/0)  
154 | | | | maximalprojectionradius >= 3.19 : Active (18/4)  
155 | | | minimalprojectionsize >= 6.45 : Inactive (1/0)  
156 balabanindex >= 1.32  
157 | logd < -0.43  
158 | | atomcount < 4  
159 | | | molecularsurfacearea < 88.1  
160 | | | | minimalprojectionradius < 2.25 : Inactive (68/22)  
161 | | | | minimalprojectionradius >= 2.25 : Inactive (3/0)  
162 | | | | molecularsurfacearea >= 88.1 : Inactive (26/11)  
163 | | | atomcount >= 4 : Active (2/0)  
164 | | logd >= -0.43 : Inactive (8/0)  
165  
166  
167 Simple CART  
  
168 asa\_ASA\_H < 61.0  
169 | minimalprojectionsize < 4.93  
170 | | minimalprojectionarea < 7.029999999999999: Active(2.0/0.0)  
171 | | minimalprojectionarea >= 7.029999999999999  
172 | | | averagemolecularpolarizability < 2.94: Active(35.0/31.0)  
173 | | | averagemolecularpolarizability >= 2.94: Active(30.0/29.0)  
174 | | minimalprojectionsize >= 4.93  
175 | | | averagemolecularpolarizability < 7.52  
176 | | | | tholepolarizability\_a\_xx < 3.4349999999999996  
177 | | | | minimalprojectionarea < 12.55  
178 | | | | | tholepolarizability\_a\_yy < 4.4: Inactive(15.0/11.0)  
179 | | | | | tholepolarizability\_a\_yy >= 4.4: Inactive(46.0/22.0)  
180 | | | | minimalprojectionarea >= 12.55: Inactive(3.0/0.0)  
181 | | | | | tholepolarizability\_a\_xx >= 3.4349999999999996: Inactive(14.0/0.0)  
182 | | | | | averagemolecularpolarizability >= 7.52: Active(2.0/0.0)  
183 asa\_ASA\_H >= 61.0: Active(95.0/25.0)  
184  
185  
186  
187  
188  
189  
190 Case study III MIC:  
  
191 Functional tree

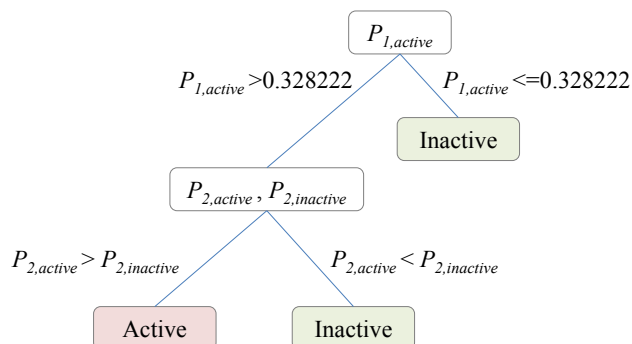

$$P_{1,active} = \frac{\exp(f_{1,active})}{\exp(f_{1,active}) + \exp(f_{1,inactive})}$$

$$P_{2,active} = \frac{\exp(f_{2,active})}{\exp(f_{2,active}) + \exp(f_{2,inactive})}, P_{2,inactive} = \frac{\exp(f_{2,inactive})}{\exp(f_{2,active}) + \exp(f_{2,inactive})}$$

192

193  $f_{1,active} = 5.1 + 0.14 \times [\text{minimalprojectionarea}] + 0.01 \times [\text{asa\_ASA\_H}] - 1.07 \times [\text{balabanindex}] -$   
 194  $0.14 \times [\text{hararyindex}] - 0.01 \times [\text{asa\_ASA+}] - 0.61 \times [\text{SsCu}] + 5.91 \times [\text{ALogPS\_logP}] + 0.91 \times [\text{ALogPS\_logS}]$   
 195  $= -f_{1,inactive}$

196  $f_{2,active} = 59.21 - 0.29 \times [\text{averagemolecularpolarizability}] + 0.14 \times [\text{minimalprojectionarea}] +$   
 197  $0.01 \times [\text{asa\_ASA\_H}] - 1.07 \times [\text{balabanindex}] - 0.14 \times [\text{hararyindex}] - 0.01 \times [\text{asa\_ASA+}] - 0.61 \times [\text{SsCu}] +$   
 198  $46.68 \times [\text{ALogPS\_logP}] + 0.39 \times [\text{ALogPS\_logS}] = -f_{2,inactive}$

199

200 C4.5 decision tree

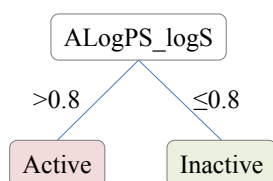

201

202 Random tree

203 tholepolarizability\_a\_yy < 2.05  
 204 | ALogPS\_logP < -1.31  
 205 | | ALogPS\_logS < 0.11 : Inactive (5/0)  
 206 | | ALogPS\_logS >= 0.11  
 207 | | | ALogPS\_logS < 0.31 : Inactive (27/13)  
 208 | | | ALogPS\_logS >= 0.31 : Inactive (13/4)  
 209 | ALogPS\_logP >= -1.31 : Active (66/14)  
 210 tholepolarizability\_a\_yy >= 2.05  
 211 | maximalprojectionarea < 21 : Inactive (18/0)  
 212 | maximalprojectionarea >= 21  
 213 | | chainatomcount < 3.5 : Inactive (3/1)  
 214 | | chainatomcount >= 3.5 : Inactive (1/0)

215

216

217 Simple CART



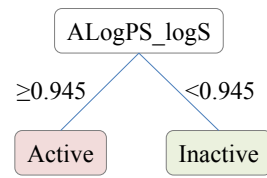

218

219

220  
221

Table S1. Performances of the LC50 related nano-SARs for *Danio rerio* and *Daphnia magna*. The best performance of the models were bolded in the table

|                                                                            | Threshold (mg/L) | Data set     | Sensitivity  | Specificity  | Accuracy     | CCR   |
|----------------------------------------------------------------------------|------------------|--------------|--------------|--------------|--------------|-------|
| <i>Danio rerio</i> , $n_{\text{training}} = 76$ , $n_{\text{test}} = 18$   |                  |              |              |              |              |       |
| Functional tree                                                            | 1                | Training set | 0.389        | 0.828        | 0.724        | 0.609 |
|                                                                            |                  | Test set     | 0.750        | 0.714        | 0.722        | 0.732 |
|                                                                            | 10               | Training set | 0.868        | 0.632        | 0.750        | 0.750 |
|                                                                            |                  | Test set     | 0.667        | 0.556        | 0.611        | 0.612 |
|                                                                            | 100              | Training set | <b>0.943</b> | <b>0.913</b> | <b>0.934</b> | 0.928 |
|                                                                            |                  | Test set     | <b>1</b>     | <b>1</b>     | <b>1</b>     | 1     |
| C4.5 decision tree                                                         | 1                | Training set | 0.056        | 0.948        | 0.737        | 0.502 |
|                                                                            |                  | Test set     | 0            | 1            | 0.778        | 0.500 |
|                                                                            | 10               | Training set | 0.947        | 0.632        | 0.789        | 0.790 |
|                                                                            |                  | Test set     | 1            | 0.556        | 0.778        | 0.778 |
|                                                                            | 100              | Training set | <b>0.906</b> | <b>0.913</b> | <b>0.908</b> | 0.910 |
|                                                                            |                  | Test set     | <b>1</b>     | <b>1</b>     | <b>1</b>     | 1     |
| <i>Daphnia magna</i> , $n_{\text{training}} = 82$ , $n_{\text{test}} = 20$ |                  |              |              |              |              |       |
| Functional tree                                                            | 1                | Training set | <b>0.843</b> | <b>0.968</b> | <b>0.890</b> | 0.906 |
|                                                                            |                  | Test set     | <b>0.750</b> | <b>1</b>     | <b>0.850</b> | 0.875 |
|                                                                            | 10               | Training set | 0.971        | 0.250        | 0.866        | 0.611 |
|                                                                            |                  | Test set     | 0.941        | 0.333        | 0.850        | 0.637 |
|                                                                            | 100              | Training set | 1            | 0            | 0.927        | 0.500 |
|                                                                            |                  | Test set     | 0.947        | 0            | 0.900        | 0.474 |
| C4.5 decision tree                                                         | 1                | Training set | <b>0.843</b> | <b>0.968</b> | <b>0.890</b> | 0.906 |
|                                                                            |                  | Test set     | <b>0.750</b> | <b>1</b>     | <b>0.850</b> | 0.875 |
|                                                                            | 10               | Training set | 0.957        | 0.250        | 0.854        | 0.604 |
|                                                                            |                  | Test set     | 0.941        | 0.333        | 0.850        | 0.637 |
|                                                                            | 100              | Training set | 1            | 0            | 0.927        | 0.500 |
|                                                                            |                  | Test set     | 1            | 0            | 0.950        | 0.500 |

222

223

224  
225

Table S2. Performances of the EC50 related nano-SARs for *Daphnia magna* and *Pseudokirchneriella subcapitata*. The best performance of the models were bolded in the table

|                                                                            | Threshold (mg/L) | Data set     | Sensitivity | Specificity | Accuracy | CCR   |
|----------------------------------------------------------------------------|------------------|--------------|-------------|-------------|----------|-------|
| <i>Daphnia magna</i> , $n_{\text{training}} = 84$ , $n_{\text{test}} = 21$ |                  |              |             |             |          |       |
| Functional tree                                                            | 1                | Training set | 0.552       | 0.909       | 0.738    | 0.731 |
|                                                                            |                  | Test set     | 0.500       | 1           | 0.762    | 0.750 |
|                                                                            | 10               | Training set | 0.926       | 0.313       | 0.810    | 0.620 |

|                                                                                              |     |              |              |              |              |       |
|----------------------------------------------------------------------------------------------|-----|--------------|--------------|--------------|--------------|-------|
|                                                                                              |     | Test set     | 1            | 0.500        | 0.905        | 0.750 |
|                                                                                              | 100 | Training set | 1            | 0            | 0.929        | 0.500 |
|                                                                                              |     | Test set     | 1            | 0            | 0.905        | 0.500 |
| C4.5 decision tree                                                                           | 1   | Training set | 0.550        | 0.909        | 0.738        | 0.730 |
|                                                                                              |     | Test set     | 0.500        | 1            | 0.762        | 0.750 |
|                                                                                              | 10  | Training set | 0.912        | 0.375        | 0.810        | 0.644 |
|                                                                                              |     | Test set     | 0.824        | 0.750        | 0.810        | 0.787 |
|                                                                                              | 100 | Training set | 1            | 0            | 0.929        | 0.500 |
|                                                                                              |     | Test set     | 1            | 0            | 0.905        | 0.500 |
| <i>Pseudokirchneriella subcapitata</i> , $n_{\text{training}} = 53$ , $n_{\text{test}} = 13$ |     |              |              |              |              |       |
| Functional tree                                                                              | 1   | Training set | <b>0.944</b> | <b>0.914</b> | <b>0.925</b> | 0.929 |
|                                                                                              |     | Test set     | <b>0.750</b> | <b>1</b>     | <b>0.923</b> | 0.875 |
|                                                                                              | 10  | Training set | 0.813        | 0.667        | 0.755        | 0.740 |
|                                                                                              |     | Test set     | 0.750        | 0.800        | 0.769        | 0.775 |
|                                                                                              | 100 | Training set | 1            | 0            | 0.906        | 0.500 |
|                                                                                              |     | Test set     | 1            | 0            | 0.846        | 0.500 |
| C4.5 decision tree                                                                           | 1   | Training set | <b>0.944</b> | <b>0.914</b> | <b>0.925</b> | 0.929 |
|                                                                                              |     | Test set     | <b>0.750</b> | <b>1</b>     | <b>0.923</b> | 0.875 |
|                                                                                              | 10  | Training set | 0.781        | 0.667        | 0.736        | 0.724 |
|                                                                                              |     | Test set     | 0.750        | 0.800        | 0.769        | 0.775 |
|                                                                                              | 100 | Training set | 1            | 0            | 0.906        | 0.500 |
|                                                                                              |     | Test set     | 1            | 0            | 0.846        | 0.500 |

226

227

228 Table S3. Performances of the MIC related nano-SARs for *Escherichia coli* and *Staphylococcus aureus*. The best  
229 performance of the models were bolded in the table

|                                                                                   | Threshold (mg/L) | Data set     | Sensitivity | Specificity | Accuracy | CCR   |
|-----------------------------------------------------------------------------------|------------------|--------------|-------------|-------------|----------|-------|
| <i>Escherichia coli</i> , $n_{\text{training}} = 33$ , $n_{\text{test}} = 8$      |                  |              |             |             |          |       |
| Functional tree                                                                   | 10               | Training set | 0           | 1           | 0.636    | 0.500 |
|                                                                                   |                  | Test set     | 0           | 1           | 0.625    | 0.500 |
|                                                                                   | 100              | Training set | 1           | 0           | 0.515    | 0.500 |
|                                                                                   |                  | Test set     | 0.882       | 0.563       | 0.727    | 0.723 |
| C4.5 decision tree                                                                | 10               | Training set | 0.250       | 0.905       | 0.667    | 0.578 |
|                                                                                   |                  | Test set     | 0           | 1           | 0.625    | 0.500 |
|                                                                                   | 100              | Training set | 0           | 1           | 0.5      | 0.500 |
|                                                                                   |                  | Test set     | 0.750       | 1           | 0.875    | 0.875 |
| <i>Staphylococcus aureus</i> , $n_{\text{training}} = 32$ , $n_{\text{test}} = 7$ |                  |              |             |             |          |       |
| Functional tree                                                                   | 10               | Training set | 1           | 0           | 0.563    | 0.500 |
|                                                                                   |                  | Test set     | 0.750       | 0.667       | 0.714    | 0.709 |

|                       |     |              |              |              |              |       |
|-----------------------|-----|--------------|--------------|--------------|--------------|-------|
| C4.5 decision<br>tree | 100 | Training set | 1            | 0            | 0.750        | 0.500 |
|                       |     | Test set     | 0.800        | 1            | 0.857        | 0.900 |
|                       | 10  | Training set | 0.667        | 0.357        | 0.531        | 0.512 |
|                       |     | Test set     | 0.750        | 0.667        | 0.714        | 0.709 |
|                       | 100 | Training set | <b>0.833</b> | <b>0.875</b> | <b>0.844</b> | 0.854 |
|                       |     | Test set     | <b>0.800</b> | <b>1</b>     | <b>0.857</b> | 0.900 |

230

231

Table S4. Data resources of LC50 data

| Data resources of LC50 toxicity endpoint                                                                                                                                                          | Number of toxicity endpoint |
|---------------------------------------------------------------------------------------------------------------------------------------------------------------------------------------------------|-----------------------------|
| Silver nanoparticles: behaviour and effects in the aquatic environment.                                                                                                                           | 20                          |
| Acute toxicities of six manufactured nanomaterial suspensions to <i>Daphnia magna</i>                                                                                                             | 4                           |
| Fractionating nanosilver: importance for determining toxicity to aquatic test organisms.                                                                                                          | 16                          |
| Toxicity and bioaccumulation of TiO <sub>2</sub> nanoparticle aggregates in <i>Daphnia magna</i> .                                                                                                | 3                           |
| Acute and chronic effects of nano- and non-nano-scale TiO <sub>2</sub> and ZnO particles on mobility and reproduction of the freshwater invertebrate <i>Daphnia magna</i> .                       | 1                           |
| Toxicity Assessment of Titanium (IV) Oxide Nanoparticles Using <i>Daphnia magna</i> (Water Flea).                                                                                                 | 3                           |
| Daphnia magna mortality when exposed to titanium dioxide and fullerene (C <sub>60</sub> ) nanoparticles.                                                                                          | 2                           |
| Biological surface coating and molting inhibition as mechanisms of TiO <sub>2</sub> nanoparticle toxicity in <i>Daphnia magna</i> .                                                               | 2                           |
| Effects of particle composition and species on toxicity of metallic nanomaterials in aquatic organisms.                                                                                           | 23                          |
| In Vivo Toxicity of Silver Nanoparticles and Silver Ions in Zebrafish ( <i>Danio rerio</i> )                                                                                                      | 1                           |
| In vitro evaluation of cytotoxicity of engineered metal oxide nanoparticles.                                                                                                                      | 7                           |
| Acute toxicity of cerium oxide, titanium oxide and iron oxide nanoparticles using standardized tests                                                                                              | 3                           |
| Effects of nano-scale TiO <sub>2</sub> , ZnO and their bulk counterparts on zebrafish: acute toxicity, oxidative stress and oxidative damage.                                                     | 5                           |
| Toxicity of nanosized and bulk ZnO, CuO and TiO <sub>2</sub> to bacteria <i>Vibrio fischeri</i> and crustaceans <i>Daphnia magna</i> and <i>Thamnocephalus platyurus</i> .                        | 9                           |
| Exposure to copper nanoparticles causes gill injury and acute lethality in zebrafish ( <i>Danio rerio</i> ).                                                                                      | 1                           |
| Comparative toxicity of several metal oxide nanoparticle aqueous suspensions to Zebrafish ( <i>Danio rerio</i> ) early developmental stage.                                                       | 1                           |
| Scientific Report No. 12                                                                                                                                                                          | 1                           |
| Fate and effects of CeO <sub>2</sub> nanoparticles in aquatic ecotoxicity tests.                                                                                                                  | 3                           |
| Toxicity of two types of silver nanoparticles to aquatic crustaceans <i>Daphnia magna</i> and <i>Thamnocephalus platyurus</i> .                                                                   | 4                           |
| Toxicity Test of Ag <sup>+</sup> , Nano-Ag <sub>0</sub> and Nano-Ag <sub>2</sub> O using Green Algae ( <i>Chlorella</i> sp.) and Water Flea ( <i>Moina</i> Macrocopa)                             | 1                           |
| Toxicity of Nanoscale CuO and ZnO to <i>Daphnia magna</i>                                                                                                                                         | 2                           |
| Ecotoxicology of nanomaterials: the role of invertebrate testing                                                                                                                                  | 15                          |
| Zebrafish as a correlative and predictive model for assessing biomaterial nanotoxicity.                                                                                                           | 1                           |
| Dispersion and toxicity of selected manufactured nanomaterials in natural river water samples: effects of water chemical composition.                                                             | 12                          |
| Acute and chronic toxicity of nano-scale TiO <sub>2</sub> particles to freshwater fish, cladocerans, and green algae, and effects of organic and inorganic substrate on TiO <sub>2</sub> toxicity | 3                           |
| Effects from filtration, capping agents, and presence/absence of food on the toxicity of silver nanoparticles to <i>Daphnia magna</i> .                                                           | 9                           |
| Differentiation of the toxicities of silver nanoparticles and silver ions to the Japanese medaka ( <i>Oryzias latipes</i> ) and the cladoceran <i>Daphnia magna</i> .                             | 2                           |
| The effects of silver nanoparticles on fathead minnow ( <i>Pimephales promelas</i> ) embryos.                                                                                                     | 6                           |
| Ecotoxicity of nanoparticles of CuO and ZnO in natural water.                                                                                                                                     | 8                           |

|                                                                                                                                                                                           |    |
|-------------------------------------------------------------------------------------------------------------------------------------------------------------------------------------------|----|
| Toxicity of manufactured zinc oxide nanoparticles in the nematode <i>Caenorhabditis elegans</i> .                                                                                         | 3  |
| Toxicogenomic responses of nanotoxicity in <i>Daphnia magna</i> exposed to silver nitrate and coated silver nanoparticles.                                                                | 11 |
| Toxicity of nanoparticulate and bulk ZnO, Al <sub>2</sub> O <sub>3</sub> and TiO <sub>2</sub> to the nematode <i>Caenorhabditis elegans</i> .                                             | 6  |
| Importance of surface coatings and soluble silver in silver nanoparticles toxicity to <i>Daphnia magna</i> .                                                                              | 5  |
| Toxicity of silver nanoparticles in zebrafish models                                                                                                                                      | 1  |
| Silver nanoparticle toxicity in the embryonic zebrafish is governed by particle dispersion and ionic environment.                                                                         | 4  |
| Effect of nanoparticle stabilization and physicochemical properties on exposure outcome: acute toxicity of silver nanoparticle preparations in zebrafish ( <i>Danio rerio</i> ).          | 14 |
| Toxicity of Silver Nanoparticles in Aquatic Ecosystems: Salinity as the Main Cause in Reducing Toxicity                                                                                   | 1  |
| Toxicity assessments of multisized gold and silver nanoparticles in zebrafish embryos.                                                                                                    | 4  |
| Toxicity of Silver and Titanium Dioxide Nanoparticle Suspensions to the Aquatic Invertebrate, <i>Daphnia magna</i>                                                                        | 2  |
| Toxicity comparison of colloidal silver nanoparticles in various life stages of rainbow trout ( <i>Oncorhynchus mykiss</i> )                                                              | 3  |
| Effects of Nanotoxicity on Female Reproductivity and Fetal Development in Animal Models                                                                                                   | 2  |
| Nanomaterials and the environment: a review for the biennium 2008-2010.                                                                                                                   | 1  |
| Effects of silver nanoparticles on the development and histopathology biomarkers of Japanese medaka ( <i>Oryzias latipes</i> ) using the partial-life test.                               | 2  |
| The primacy of physicochemical characterization of nanomaterials for reliable toxicity assessment: a review of the zebrafish nanotoxicology model.                                        | 6  |
| Engineered Nanoparticles: Review of Health and Environmental Safety                                                                                                                       | 10 |
| The toxicity of silver nanoparticles to zebrafish embryos increases through sewage treatment processes.                                                                                   | 4  |
| Acute effects of Fe <sub>2</sub> O <sub>3</sub> , TiO <sub>2</sub> , ZnO and CuO nanomaterials on <i>Xenopus laevis</i> .                                                                 | 6  |
| Silver nanoparticles and silver nitrate induce high toxicity to <i>Pseudokirchneriella subcapitata</i> , <i>Daphnia magna</i> and <i>Danio rerio</i> .                                    | 3  |
| Comparison of nanosilver and ionic silver toxicity in <i>Daphnia magna</i> and <i>Pimephales promelas</i> .                                                                               | 6  |
| Effects of Cu <sub>2</sub> O nanoparticle and CuCl <sub>2</sub> on zebrafish larvae and a liver cell-line.                                                                                | 1  |
| Acute toxicity of 31 different nanoparticles to zebrafish ( <i>Danio rerio</i> ) tested in adulthood and in early life stages - comparative study.                                        | 18 |
| Determination of the mechanism of photoinduced toxicity.xls                                                                                                                               | 4  |
| Determination of the mechanism of photoinduced toxicity of selected metal oxide nanoparticles (ZnO, CuO, Co <sub>3</sub> O <sub>4</sub> and TiO <sub>2</sub> ) to <i>E. coli</i> bacteria | 4  |
| Ecotoxicity of manufactured ZnO nanoparticles--a review.                                                                                                                                  | 8  |
| Toxicity of TiO <sub>2</sub> nanoparticles to cladocerans, algae, rotifers and plants - effects of size and crystalline structure.                                                        | 4  |
| Accumulation and toxicity of metal oxide nanoparticles in a soft-sediment estuarine amphipod.                                                                                             | 4  |
| Metal-based nanoparticles in soil: fate, behavior, and effects on soil invertebrates.                                                                                                     | 6  |
| Developmental toxicity of Japanese medaka embryos by silver nanoparticles and released ions in the presence of humic acid.                                                                | 2  |
| The impact of size on the fate and toxicity of nanoparticulate silver in aquatic systems.                                                                                                 | 2  |
| Toxicity of copper oxide nanoparticle suspensions to aquatic biota.                                                                                                                       | 3  |

|                                                                                                                                                                                                   |    |
|---------------------------------------------------------------------------------------------------------------------------------------------------------------------------------------------------|----|
| Phototoxicity of TiO <sub>2</sub> nanoparticles under solar radiation to two aquatic species: <i>Daphnia magna</i> and Japanese medaka.                                                           | 3  |
| Acute and chronic toxicity of nano-scale TiO <sub>2</sub> particles to freshwater fish, cladocerans, and green algae, and effects of organic and inorganic substrate on TiO <sub>2</sub> toxicity | 8  |
| Effects of Silica Dioxide Nanoparticles on the Embryonic Development of Zebrafish                                                                                                                 | 1  |
| Freshwater snail vital rates affected by non-lethal concentrations of silver nanoparticles                                                                                                        | 1  |
| Initial Study on the Toxicity of Silver Nanoparticles (NPs) against <i>Paramecium caudatum</i>                                                                                                    | 4  |
| Investigating potential toxicity of phenanthrene adsorbed to nano-ZnO using <i>Daphnia magna</i>                                                                                                  | 4  |
| Toxicity of silver, titanium and silicon nanoparticles on the root-knot nematode, <i>Meloidogyne incognita</i> , and growth parameters of tomato                                                  | 1  |
| Determination of the mechanism of photoinduced toxicity of selected metal oxide nanoparticles (ZnO, CuO, Co <sub>3</sub> O <sub>4</sub> and TiO <sub>2</sub> ) to <i>E. coli</i> bacteria.        | 8  |
| Assessment of nanosilver toxicity during zebrafish ( <i>Danio rerio</i> ) development.                                                                                                            | 1  |
| <i>Ceriodaphnia dubia</i> as a potential bio-indicator for assessing acute aluminum oxide nanoparticle toxicity in fresh water environment.                                                       | 3  |
| Comparative toxicity of nano-ZnO and bulk ZnO suspensions to zebrafish and the effects of sedimentation, <sup>•</sup> OH production and particle dissolution in distilled water.                  | 1  |
| Differential gene expression in <i>Daphnia magna</i> suggests distinct modes of action and bioavailability for ZnO nanoparticles and Zn ions.                                                     | 1  |
| Effect of subacute exposure to silver nanoparticle on some hematological and plasma biochemical indices in silver carp ( <i>Hypophthalmichthys molitrix</i> ).                                    | 4  |
| Effects of nano-sized zero-valent iron (nZVI) on DDT degradation in soil and its toxicity to collembola and ostracods.                                                                            | 1  |
| Elemental selenium particles at nano-size (Nano-Se) are more toxic to Medaka ( <i>Oryzias latipes</i> ) as a consequence of hyper-accumulation of selenium: a comparison with sodium selenite.    | 1  |
| Evaluation of the toxic impact of silver nanoparticles on Japanese medaka ( <i>Oryzias latipes</i> ).                                                                                             | 1  |
| Histopathological studies and oxidative stress of synthesized silver nanoparticles in Mozambique tilapia ( <i>Oreochromis mossambicus</i> ).                                                      | 1  |
| Interaction of silver nanoparticles with biological surfaces of <i>Caenorhabditis elegans</i> .                                                                                                   | 1  |
| Photoinactivation of <i>Escherichia coli</i> by sulfur-doped and nitrogen-fluorine-codoped TiO <sub>2</sub> nanoparticles under solar simulated light and visible light irradiation.              | 10 |
| Phototoxicity of TiO <sub>2</sub> nanoparticles to zebrafish ( <i>Danio rerio</i> ) is dependent on life stage.                                                                                   | 3  |
| Silver nanocolloids disrupt medaka embryogenesis through vital gene expressions.                                                                                                                  | 1  |
| Silver nanoparticle toxicity to <i>Daphnia magna</i> is a function of dissolved silver concentration.                                                                                             | 9  |
| Silver nanoparticles cause oxidative damage and histological changes in medaka ( <i>Oryzias latipes</i> ) after 14 days of exposure.                                                              | 3  |
| Silver nanoparticle-specific mitotoxicity in <i>Daphnia magna</i> .                                                                                                                               | 1  |
| Surface interactions affect the toxicity of engineered metal oxide nanoparticles toward <i>Paramecium</i> .                                                                                       | 4  |
| The zerovalent iron nanoparticle causes higher developmental toxicity than its oxidation products in early life stages of medaka fish.                                                            | 1  |
| Titanium dioxide nanoparticles produce phototoxicity in the developing zebrafish.                                                                                                                 | 1  |
| Toxicity assessment of iron oxide nanoparticles in zebrafish ( <i>Danio rerio</i> ) early life stages.                                                                                            | 1  |
| Toxicity of silver and titanium dioxide nanoparticle suspensions to the aquatic invertebrate, <i>Daphnia magna</i> .                                                                              | 2  |
| Zinc oxide nanoparticles toxicity to <i>Daphnia magna</i> : size-dependent effects and dissolution.                                                                                               | 1  |

Table S5. Data resources of EC50 data

| <b>Data resources of EC50 toxicity endpoint</b>                                                                                                                                                | <b>Number of toxicity endpoint</b> |
|------------------------------------------------------------------------------------------------------------------------------------------------------------------------------------------------|------------------------------------|
| Acute toxicities of six manufactured nanomaterial suspensions to <i>Daphnia magna</i>                                                                                                          | 5                                  |
| Toxicity of silver nanoparticles to <i>Chlamydomonas reinhardtii</i> .                                                                                                                         | 10                                 |
| Toxicity and bioaccumulation of TiO <sub>2</sub> nanoparticle aggregates in <i>Daphnia magna</i> .                                                                                             | 1                                  |
| Acute and chronic effects of nano- and non-nano-scale TiO <sub>2</sub> and ZnO particles on mobility and reproduction of the freshwater invertebrate <i>Daphnia magna</i> .                    | 5                                  |
| Biological surface coating and molting inhibition as mechanisms of TiO <sub>2</sub> nanoparticle toxicity in <i>Daphnia magna</i> .                                                            | 2                                  |
| Effects of particle composition and species on toxicity of metallic nanomaterials in aquatic organisms.                                                                                        | 4                                  |
| Acute toxicity of cerium oxide, titanium oxide and iron oxide nanoparticles using standardized tests                                                                                           | 2                                  |
| Aggregation and toxicity of titanium dioxide nanoparticles in aquatic environment--a review.                                                                                                   | 2                                  |
| Toxicity of nanosized and bulk ZnO, CuO and TiO <sub>2</sub> to bacteria <i>Vibrio fischeri</i> and crustaceans <i>Daphnia magna</i> and <i>Thamnocephalus platyurus</i> .                     | 8                                  |
| Comparative toxicity of several metal oxide nanoparticle aqueous suspensions to Zebrafish ( <i>Danio rerio</i> ) early developmental stage.                                                    | 1                                  |
| Toxicity of nanoparticles of CuO, ZnO and TiO <sub>2</sub> to microalgae <i>Pseudokirchneriella subcapitata</i> .                                                                              | 9                                  |
| Toxicity of various silver nanoparticles compared to silver ions in <i>Daphnia magna</i> .                                                                                                     | 3                                  |
| Algal testing of titanium dioxide nanoparticles--testing considerations, inhibitory effects and modification of cadmium bioavailability.                                                       | 4                                  |
| Fate and effects of CeO <sub>2</sub> nanoparticles in aquatic ecotoxicity tests.                                                                                                               | 9                                  |
| Ecotoxic effect of photocatalytic active nanoparticles (TiO <sub>2</sub> ) on algae and daphnids.                                                                                              | 2                                  |
| Toxicity of two types of silver nanoparticles to aquatic crustaceans <i>Daphnia magna</i> and <i>Thamnocephalus platyurus</i> .                                                                | 6                                  |
| Ecotoxicity of TiO <sub>2</sub> to <i>Daphnia similis</i> under irradiation.                                                                                                                   | 6                                  |
| Acute toxicity of TiO <sub>2</sub> nanoparticles to <i>Ceriodaphnia dubia</i> under visible light and dark conditions in a freshwater system.                                                  | 2                                  |
| Acute toxicity of nanosized TiO <sub>2</sub> to <i>Daphnia magna</i> under UVA irradiation.                                                                                                    | 4                                  |
| Changes in the <i>Daphnia magna</i> midgut upon ingestion of copper oxide nanoparticles: a transmission electron microscopy study.                                                             | 2                                  |
| Toxicity Test of Ag <sup>+</sup> , Nano-Ag <sup>0</sup> and Nano-Ag <sub>2</sub> O using Green Algae ( <i>Chlorella</i> sp.) and Water Flea ( <i>Moina Macrocopa</i> )                         | 1                                  |
| Toxicity of Nanoscale CuO and ZnO to <i>Daphnia magna</i>                                                                                                                                      | 3                                  |
| Microbial toxicity of metal oxide nanoparticles (CuO, NiO, ZnO, and Sb <sub>2</sub> O <sub>3</sub> ) to <i>Escherichia coli</i> , <i>Bacillus subtilis</i> , and <i>Streptococcus aureus</i> . | 17                                 |
| Differentiation of the toxicities of silver nanoparticles and silver ions to the Japanese medaka ( <i>Oryzias latipes</i> ) and the cladoceran <i>Daphnia magna</i> .                          | 2                                  |
| Ecotoxicity of nanoparticles of CuO and ZnO in natural water.                                                                                                                                  | 12                                 |
| Ecotoxicity of nanosized TiO <sub>2</sub> . Review of in vivo data.                                                                                                                            | 3                                  |
| Toxicity of manufactured zinc oxide nanoparticles in the nematode <i>Caenorhabditis elegans</i> .                                                                                              | 3                                  |
| Development of a base set of toxicity tests using ultrafine TiO <sub>2</sub> particles as a component of                                                                                       | 7                                  |



|                                                                                                                                                                                                   |    |
|---------------------------------------------------------------------------------------------------------------------------------------------------------------------------------------------------|----|
| nanoparticle risk management.                                                                                                                                                                     |    |
| Silver nanoparticle toxicity in the embryonic zebrafish is governed by particle dispersion and ionic environment.                                                                                 | 4  |
| The toxicity of silver nanoparticles to zebrafish embryos increases through sewage treatment processes.                                                                                           | 6  |
| Acute effects of Fe <sub>2</sub> O <sub>3</sub> , TiO <sub>2</sub> , ZnO and CuO nanomaterials on <i>Xenopus laevis</i> .                                                                         | 13 |
| Silver nanoparticles and silver nitrate induce high toxicity to <i>Pseudokirchneriella subcapitata</i> , <i>Daphnia magna</i> and <i>Danio rerio</i> .                                            | 3  |
| Toxicity of nanoparticles of ZnO, CuO and TiO <sub>2</sub> to yeast <i>Saccharomyces cerevisiae</i> .                                                                                             | 13 |
| Toxicity of ZnO and CuO nanoparticles to ciliated protozoa <i>Tetrahymena thermophila</i> .                                                                                                       | 12 |
| Nano-silver induces dose-response effects on the nematode <i>Caenorhabditis elegans</i> .                                                                                                         | 2  |
| Ecotoxicity of manufactured ZnO nanoparticles--a review.                                                                                                                                          | 2  |
| Toxicity of TiO <sub>2</sub> nanoparticles to cladocerans, algae, rotifers and plants - effects of size and crystalline structure.                                                                | 12 |
| Chronic toxicity of ZnO nanoparticles, non-nano ZnO and ZnCl <sub>2</sub> to <i>Folsomia candida</i> (Collembola) in relation to bioavailability in soil.                                         | 1  |
| Evaluation of toxicity and oxidative stress induced by copper oxide nanoparticles in the green alga <i>Chlamydomonas reinhardtii</i> .                                                            | 1  |
| Ecotoxicity of non-aged and aged CeO <sub>2</sub> nanomaterials towards freshwater microalgae.                                                                                                    | 3  |
| The impact of size on the fate and toxicity of nanoparticulate silver in aquatic systems.                                                                                                         | 8  |
| Toxicity of copper oxide nanoparticle suspensions to aquatic biota.                                                                                                                               | 1  |
| Acute toxicity of Ag and CuO nanoparticle suspensions against <i>Daphnia magna</i> : the importance of their dissolved fraction varying with preparation methods.                                 | 32 |
| Nanomaterial-Biological Interactions Knowledgebase                                                                                                                                                | 14 |
| ER_li_data.xlsx                                                                                                                                                                                   | 1  |
| Responses of <i>Ceriodaphnia dubia</i> to TiO <sub>2</sub> and Al <sub>2</sub> O <sub>3</sub> nanoparticles: a dynamic nano-toxicity assessment of energy budget distribution.                    | 2  |
| Acute and chronic toxicity of nano-scale TiO <sub>2</sub> particles to freshwater fish, cladocerans, and green algae, and effects of organic and inorganic substrate on TiO <sub>2</sub> toxicity | 7  |
| A comparative cytotoxicity study of TiO <sub>2</sub> nanoparticles under light and dark conditions at low exposure concentrations                                                                 | 4  |
| Cytotoxicity of TiO <sub>2</sub> nanoparticles and their detoxification in a freshwater system                                                                                                    | 2  |
| Responses of algae to photocatalytic nano-TiO <sub>2</sub> particles with an emphasis on the effect of particle size                                                                              | 5  |
| Studies on toxicity of aluminum oxide (Al <sub>2</sub> O <sub>3</sub> ) nanoparticles to microalgae species: <i>Scenedesmus</i> sp and <i>Chlorella</i> sp                                        | 2  |
| Toxicity of oxide nanoparticles to the green alga <i>Chlorella</i> sp                                                                                                                             | 1  |
| A new medium for <i>Caenorhabditis elegans</i> toxicology and nanotoxicology studies designed to better reflect natural soil solution conditions.                                                 | 1  |
| Ag nanoparticles: size- and surface-dependent effects on model aquatic organisms and uptake evaluation with NanoSIMS.                                                                             | 12 |
| Aquatic toxicity of nanosilver colloids to different trophic organisms: contributions of particles and free silver ion.                                                                           | 6  |
| Assay-dependent effect of silver nanoparticles to <i>Escherichia coli</i> and <i>Bacillus subtilis</i> .                                                                                          | 1  |
| Biototoxicity of nickel oxide nanoparticles and bio-remediation by microalgae <i>Chlorella vulgaris</i> .                                                                                         | 2  |
| Comparative toxicity assessment of nanosilver on three <i>Daphnia</i> species in acute, chronic and multi-                                                                                        | 3  |

|                                                                                                                                                                                                                                                                         |    |
|-------------------------------------------------------------------------------------------------------------------------------------------------------------------------------------------------------------------------------------------------------------------------|----|
| generation experiments.                                                                                                                                                                                                                                                 |    |
| Comparative toxicity of nanoparticulate ZnO, bulk ZnO, and ZnCl <sub>2</sub> to a freshwater microalga ( <i>Pseudokirchneriella subcapitata</i> ): the importance of particle solubility.                                                                               | 2  |
| Differential effect of common ligands and molecular oxygen on antimicrobial activity of silver nanoparticles versus silver ions.                                                                                                                                        | 1  |
| Dissolution of silver nanowires and nanospheres dictates their toxicity to <i>Escherichia coli</i> .                                                                                                                                                                    | 2  |
| Effect of light on toxicity of nanosilver to <i>Tetrahymena pyriformis</i> .                                                                                                                                                                                            | 1  |
| Effect of ZnO and TiO <sub>2</sub> nanoparticles preilluminated with UVA and UVB light on <i>Escherichia coli</i> and <i>Bacillus subtilis</i> .                                                                                                                        | 8  |
| Effects of nano-sized zero-valent iron (nZVI) on DDT degradation in soil and its toxicity to collembola and ostracods.                                                                                                                                                  | 1  |
| Effects of natural water chemistry on nanosilver behavior and toxicity to <i>Ceriodaphnia dubia</i> and <i>Pseudokirchneriella subcapitata</i> .                                                                                                                        | 4  |
| Effects of zinc oxide and titanium dioxide nanoparticles on green algae under visible, UVA, and UVB irradiations: no evidence of enhanced algal toxicity under UV pre-irradiation.                                                                                      | 3  |
| High throughput kinetic <i>Vibrio fischeri</i> bioluminescence inhibition assay for study of toxic effects of nanoparticles.                                                                                                                                            | 4  |
| Ion-release kinetics and ecotoxicity effects of silver nanoparticles.                                                                                                                                                                                                   | 2  |
| Mechanism of silver nanoparticle toxicity is dependent on dissolved silver and surface coating in <i>Caenorhabditis elegans</i> .                                                                                                                                       | 14 |
| Physicochemical characterization and ecotoxicological assessment of CeO <sub>2</sub> nanoparticles using two aquatic microorganisms.                                                                                                                                    | 24 |
| Phytotoxicity of silver nanoparticles to <i>Lemna minor</i> L.                                                                                                                                                                                                          | 8  |
| Profiling of the reactive oxygen species-related ecotoxicity of CuO, ZnO, TiO <sub>2</sub> , silver and fullerene nanoparticles using a set of recombinant luminescent <i>Escherichia coli</i> strains: differentiating the impact of particles and solubilised metals. | 35 |
| Silver nanotoxicity using a light-emitting biosensor <i>Pseudomonas putida</i> isolated from a wastewater treatment plant.                                                                                                                                              | 12 |
| The chronic toxicity of ZnO nanoparticles and ZnCl <sub>2</sub> to <i>Daphnia magna</i> and the use of different methods to assess nanoparticle aggregation and dissolution.                                                                                            | 1  |
| The critical importance of defined media conditions in <i>Daphnia magna</i> nanotoxicity studies.                                                                                                                                                                       | 1  |
| Toxic effects of ZnO nanoparticles towards marine algae <i>Dunaliella tertiolecta</i> .                                                                                                                                                                                 | 1  |
| Toxicity assessment of iron oxide nanoparticles in zebrafish ( <i>Danio rerio</i> ) early life stages.                                                                                                                                                                  | 1  |
| Toxicity of CuO nanoparticles to yeast <i>Saccharomyces cerevisiae</i> BY4741 wild-type and its nine isogenic single-gene deletion mutants.                                                                                                                             | 10 |
| Zinc oxide nanoparticles toxicity to <i>Daphnia magna</i> : size-dependent effects and dissolution.                                                                                                                                                                     | 4  |

236

237

238

Table S6. Data resources of MIC data

| <b>Data resources of MIC toxicity endpoint</b>                                                           | <b>Number of toxicity endpoint</b> |
|----------------------------------------------------------------------------------------------------------|------------------------------------|
| Effect of Surfactants and Polymers on Stability and Antibacterial Activity of Silver Nanoparticles (NPs) | 50                                 |

|                                                                                                                                                                                                                       |    |
|-----------------------------------------------------------------------------------------------------------------------------------------------------------------------------------------------------------------------|----|
| Silver colloid nanoparticles: synthesis, characterization, and their antibacterial activity.                                                                                                                          | 44 |
| Toxicity of nanosized and bulk ZnO, CuO and TiO <sub>2</sub> to bacteria <i>Vibrio fischeri</i> and crustaceans <i>Daphnia magna</i> and <i>Thamnocephalus platyurus</i> .                                            | 8  |
| Antimicrobial efficacy of nanosilver, sodium hypochlorite and chlorhexidine gluconate against <i>Enterococcus faecalis</i>                                                                                            | 2  |
| Synthesis and antibacterial activity of a Fe <sub>3</sub> O <sub>4</sub> -AgCl nanocomposite against <i>Escherichia coli</i>                                                                                          | 1  |
| Adsorbed polymer and NOM limits adhesion and toxicity of nano scale zerovalent iron to <i>E. coli</i> .                                                                                                               | 4  |
| Antibacterial efficacy of silver nanoparticles of different sizes, surface conditions and synthesis methods.                                                                                                          | 32 |
| Comparative toxicity assessment of CeO <sub>2</sub> and ZnO nanoparticles towards <i>Sinorhizobium meliloti</i> , a symbiotic alfalfa associated bacterium: use of advanced microscopic and spectroscopic techniques. | 1  |
| Impacts of silver nanoparticles on cellular and transcriptional activity of nitrogen-cycling bacteria.                                                                                                                | 3  |
| Non-cytotoxic nanomaterials enhance antimicrobial activities of cefmetazole against multidrug-resistant <i>Neisseria gonorrhoeae</i> .                                                                                | 2  |
| Poly-L-lysine-modified reduced graphene oxide stabilizes the copper nanoparticles with higher water-solubility and long-term additively antibacterial activity.                                                       | 4  |
| Selective toxicity of ZnO nanoparticles toward Gram-positive bacteria and cancer cells by apoptosis through lipid peroxidation.                                                                                       | 3  |
| Strain specificity in antimicrobial activity of silver and copper nanoparticles.                                                                                                                                      | 12 |

239

240

Table S7. Detailed information of the LC50 data used for building nano-SARs

| Information of nanoparticles in the Online Chemical Modeling Environment (OCHEM) platform |                     |                    |                      |                       | Sub-dataset  | Classification (threshold value 1.0 mg/L) | Species tested                  |
|-------------------------------------------------------------------------------------------|---------------------|--------------------|----------------------|-----------------------|--------------|-------------------------------------------|---------------------------------|
| Material Nanoparticles of Elements                                                        | SMILES              | RECORD ID in OCHEM | MOLECULE ID in OCHEM | Identifier in article |              |                                           |                                 |
| Silver                                                                                    | [Ag].[Ag]           | R2691529           | M2645220             | AUTO_7                | training set | Active                                    | <i>Zebrafish embryo</i>         |
| Silver, colloid                                                                           | [Ag].[Ag]           | R9889878           | M2645220             | AUTO_8                | training set | Active                                    | <i>Danio rerio</i>              |
| Silver                                                                                    | [Ag].[Ag]           | R21028214          | M2645220             | AUTO_190              | training set | Active                                    | <i>Ceriodaphnia dubia</i>       |
| Copper(II) oxide                                                                          | O=[Cu].O=[Cu]       | R9870385           | M2652894             | AUTO_11               | training set | Active                                    | <i>Daphnia pulex</i>            |
| Copper(II) oxide                                                                          | O=[Cu].O=[Cu]       | R21028034          | M2652894             | AUTO_9                | training set | Active                                    | <i>Leptocheirus plumulosus</i>  |
| Silver, colloid                                                                           | [Ag].[Ag]           | R9889873           | M2645220             | AUTO_3                | training set | Active                                    | <i>Danio rerio</i>              |
| Silver, colloid                                                                           | [Ag].[Ag]           | R9889877           | M2645220             | AUTO_7                | training set | Active                                    | <i>Danio rerio</i>              |
| Silver                                                                                    | [Ag].[Ag]           | R9870394           | M2645220             | AUTO_1                | training set | Active                                    | <i>Ceriodaphnia dubia</i>       |
| Zinc oxide                                                                                | O=[Zn].O=[Zn]       | R9870389           | M2652893             | AUTO_15               | training set | Active                                    | <i>Thamnocephalus platyurus</i> |
| Zinc oxide                                                                                | O=[Zn].O=[Zn]       | R21028035          | M2652893             | AUTO_10               | training set | Active                                    | <i>Leptocheirus plumulosus</i>  |
| Silver                                                                                    | [Ag].[Ag]           | R21028074          | M2645220             | AUTO_49               | training set | Active                                    | <i>Ceriodaphnia dubia</i>       |
| Silver                                                                                    | [Ag].[Ag]           | R9870396           | M2645220             | AUTO_3                | training set | Active                                    | <i>Ceriodaphnia dubia</i>       |
| Silver, rod                                                                               | [Ag].[Ag]           | R9889882           | M2645220             | AUTO_12               | training set | Active                                    | <i>Danio rerio</i>              |
| Silver, colloid                                                                           | [Ag].[Ag]           | R9889874           | M2645220             | AUTO_4                | training set | Active                                    | <i>Danio rerio</i>              |
| Silver oxide                                                                              | O=[Ag].O=[Ag]       | R9876467           | M3728112             | AUTO_2                | training set | Active                                    | <i>Daphnia magna</i>            |
| Silver                                                                                    | [Ag].[Ag]           | R9879040           | M2645220             | AUTO_4                | training set | Active                                    | <i>Daphnia magna</i>            |
| Silver                                                                                    | [Ag].[Ag]           | R21028094          | M2645220             | AUTO_70               | training set | Active                                    | <i>Daphnia magna</i>            |
| Silver                                                                                    | [Ag].[Ag]           | R21028145          | M2645220             | AUTO_121              | training set | Active                                    | <i>Daphnia magna</i>            |
| Silver oxide                                                                              | O=[Ag].O=[Ag]       | R9876466           | M3728112             | AUTO_1                | training set | Active                                    | <i>Daphnia magna</i>            |
| Silver                                                                                    | [Ag].[Ag]           | R9889043           | M2645220             | AUTO_3                | training set | Active                                    | <i>Daphnia magna</i>            |
| Copper(II) oxide                                                                          | O=[Cu].O=[Cu]       | R9870386           | M2652894             | AUTO_12               | training set | Active                                    | <i>Ceriodaphnia dubia</i>       |
| Copper(I) oxide                                                                           | [Cu]O[Cu].[Cu]O[Cu] | R21028100          | M84341516            | AUTO_76               | training set | Active                                    | <i>Danio rerio</i>              |
| Silver, colloid                                                                           | [Ag].[Ag]           | R9889881           | M2645220             | AUTO_11               | training set | Active                                    | <i>Danio rerio</i>              |
| Silver                                                                                    | [Ag].[Ag]           | R9879043           | M2645220             | AUTO_7                | training set | Active                                    | <i>Daphnia</i>                  |

|                  |               |           |          |          |              |        |                                 |
|------------------|---------------|-----------|----------|----------|--------------|--------|---------------------------------|
|                  |               |           |          |          |              |        | <i>magna</i>                    |
| Silver, colloid  | [Ag].[Ag]     | R9889879  | M2645220 | AUTO_9   | training set | Active | <i>Danio rerio</i>              |
| Silver           | [Ag].[Ag]     | R9879046  | M2645220 | AUTO_10  | training set | Active | <i>Daphnia magna</i>            |
| Silver           | [Ag].[Ag]     | R2642961  | M2645220 | AUTO_2   | training set | Active | <i>Daphnia magna</i>            |
| Silver           | [Ag].[Ag]     | R9879037  | M2645220 | AUTO_1   | training set | Active | <i>Daphnia magna</i>            |
| Silver           | [Ag].[Ag]     | R9889042  | M2645220 | AUTO_2   | training set | Active | <i>Daphnia magna</i>            |
| Silver           | [Ag].[Ag]     | R21028146 | M2645220 | AUTO_122 | training set | Active | <i>Daphnia magna</i>            |
| Silver           | [Ag].[Ag]     | R21028215 | M2645220 | AUTO_191 | training set | Active | <i>Ceriodaphnia dubia</i>       |
| Silver           | [Ag].[Ag]     | R21028279 | M2645220 | AUTO_256 | training set | Active | <i>Daphnia magna</i>            |
| Copper           | [Cu].[Cu]     | R21028077 | M2655006 | AUTO_52  | training set | Active | <i>Ceriodaphnia dubia</i>       |
| Silver           | [Ag].[Ag]     | R21028198 | M2645220 | AUTO_174 | training set | Active | <i>Daphnia magna</i>            |
| Silver           | [Ag].[Ag]     | R21028143 | M2645220 | AUTO_119 | training set | Active | <i>Physa acuta</i>              |
| Silver           | [Ag].[Ag]     | R21028192 | M2645220 | AUTO_168 | training set | Active | <i>Daphnia magna</i>            |
| Silver           | [Ag].[Ag]     | R9890206  | M2645220 | AUTO_1   | training set | Active | <i>Daphnia magna neonates</i>   |
| Silver           | [Ag].[Ag]     | R21028265 | M2645220 | AUTO_242 | training set | Active | <i>Daphnia magna</i>            |
| Silver           | [Ag].[Ag]     | R21028199 | M2645220 | AUTO_175 | training set | Active | <i>Daphnia magna</i>            |
| Silver           | [Ag].[Ag]     | R21028193 | M2645220 | AUTO_169 | training set | Active | <i>Daphnia magna</i>            |
| Zinc oxide       | O=[Zn].O=[Zn] | R9870387  | M2652893 | AUTO_13  | training set | Active | <i>Daphnia magna</i>            |
| Silver           | [Ag].[Ag]     | R21028097 | M2645220 | AUTO_73  | training set | Active | <i>Daphnia magna</i>            |
| Silver           | [Ag].[Ag]     | R2642963  | M2645220 | AUTO_4   | training set | Active | <i>Daphnia magna</i>            |
| Silver           | [Ag].[Ag]     | R2642962  | M2645220 | AUTO_3   | training set | Active | <i>Daphnia magna</i>            |
| Copper(II) oxide | O=[Cu].O=[Cu] | R9870384  | M2652894 | AUTO_10  | training set | Active | <i>Thamnocephalus platyurus</i> |
| Silver           | [Ag].[Ag]     | R9879039  | M2645220 | AUTO_3   | training set | Active | <i>Daphnia magna</i>            |
| Silver           | [Ag].[Ag]     | R9870395  | M2645220 | AUTO_2   | training set | Active | <i>Ceriodaphnia dubia</i>       |
| Silver           | [Ag].[Ag]     | R21028076 | M2645220 | AUTO_51  | training set | Active | <i>Ceriodaphnia dubia</i>       |
| Silver           | [Ag].[Ag]     | R9997786  | M2645220 | AUTO_1   | training set | Active | <i>Daphnia magna</i>            |
| Silver           | [Ag].[Ag]     | R2642969  | M2645220 | AUTO_11  | training set | Active | <i>Pimephales promelas</i>      |
| Copper(II) oxide | O=[Cu].O=[Cu] | R9870383  | M2652894 | AUTO_9   | training set | Active | <i>Daphnia magna</i>            |
| Zinc oxide       | O=[Zn].O=[Zn] | R9870388  | M2652893 | AUTO_14  | training set | Active | <i>Daphnia magna</i>            |

|                  |                                      |           |          |          |              |        |                            |
|------------------|--------------------------------------|-----------|----------|----------|--------------|--------|----------------------------|
| Silver           | [Ag].[Ag]                            | R21028204 | M2645220 | AUTO_180 | training set | Active | <i>Daphnia magna</i>       |
| Silver           | [Ag].[Ag]                            | R9879038  | M2645220 | AUTO_2   | training set | Active | <i>Daphnia magna</i>       |
| Silver           | [Ag].[Ag]                            | R9979589  | M2645220 | AUTO_1   | training set | Active | <i>Daphnia magna</i>       |
| Silver           | [Ag].[Ag]                            | R21028055 | M2645220 | AUTO_30  | training set | Active | <i>Daphnia magna</i>       |
| Silver           | [Ag].[Ag]                            | R2642965  | M2645220 | AUTO_6   | training set | Active | <i>Daphnia magna</i>       |
| Silver           | [Ag].[Ag]                            | R9979590  | M2645220 | AUTO_2   | training set | Active | <i>Daphnia magna</i>       |
| Silver, colloid  | [Ag].[Ag]                            | R9889876  | M2645220 | AUTO_6   | training set | Active | <i>Danio rerio</i>         |
| Silver, colloid  | [Ag].[Ag]                            | R9889884  | M2645220 | AUTO_14  | training set | Active | <i>Danio rerio</i>         |
| Silver, colloid  | [Ag].[Ag]                            | R9889883  | M2645220 | AUTO_13  | training set | Active | <i>Danio rerio</i>         |
| Silver           | [Ag].[Ag]                            | R21028195 | M2645220 | AUTO_171 | training set | Active | <i>Daphnia magna</i>       |
| Silver           | [Ag].[Ag]                            | R21028196 | M2645220 | AUTO_172 | training set | Active | <i>Daphnia magna</i>       |
| Aluminium oxide  | O=[Al]O[Al]<br>]=O.O=[Al]<br>O[Al]=O | R9870382  | M2652898 | AUTO_8   | training set | Active | <i>Ceriodaphnia dubia</i>  |
| Silver           | [Ag].[Ag]                            | R2642966  | M2645220 | AUTO_7   | training set | Active | <i>Daphnia magna</i>       |
| Titanium         | O=[Ti]=O.O<br>=[Ti]=O                | R2646241  | M2645228 | AUTO_9   | training set | Active | <i>Daphnia magna</i>       |
| Titanium dioxide | O=[Ti]=O.O<br>=[Ti]=O                | R9870376  | M2645228 | AUTO_2   | training set | Active | <i>Daphnia magna</i>       |
| Titanium dioxide | O=[Ti]=O.O<br>=[Ti]=O                | R21028060 | M2645228 | AUTO_35  | training set | Active | <i>Daphnia magna</i>       |
| Silver           | [Ag].[Ag]                            | R9879041  | M2645220 | AUTO_5   | training set | Active | <i>Daphnia magna</i>       |
| Silver           | [Ag].[Ag]                            | R21028098 | M2645220 | AUTO_74  | training set | Active | <i>Daphnia magna</i>       |
| Silver           | [Ag].[Ag]                            | R2642967  | M2645220 | AUTO_8   | training set | Active | <i>Daphnia magna</i>       |
| Silver           | [Ag].[Ag]                            | R2642970  | M2645220 | AUTO_12  | training set | Active | <i>Pimephales promelas</i> |
| Silver           | [Ag].[Ag]                            | R21028056 | M2645220 | AUTO_31  | training set | Active | <i>Daphnia magna</i>       |
| Silver, colloid  | [Ag].[Ag]                            | R9889871  | M2645220 | AUTO_1   | training set | Active | <i>Danio rerio</i>         |
| Silver           | [Ag].[Ag]                            | R9997787  | M2645220 | AUTO_2   | training set | Active | <i>Daphnia magna</i>       |
| Silver           | [Ag].[Ag]                            | R9877327  | M2645220 | AUTO_1   | training set | Active | <i>Oryzias latipes</i>     |
| Titanium dioxide | O=[Ti]=O.O<br>=[Ti]=O                | R21028186 | M2645228 | AUTO_162 | training set | Active | <i>Daphnia magna</i>       |
| Silver           | [Ag].[Ag]                            | R21028123 | M2645220 | AUTO_99  | training set | Active | <i>Oryzias latipes</i>     |
| Silver           | [Ag].[Ag]                            | R21028099 | M2645220 | AUTO_75  | training set | Active | <i>Daphnia magna</i>       |
| Silver           | [Ag].[Ag]                            | R2691536  | M2645220 | AUTO_14  | training set | Active | <i>Daphnia pulex</i>       |
| Silver           | [Ag].[Ag]                            | R9895726  | M2645220 | AUTO_7   | training set | Active | <i>Daphnia pulex</i>       |

|                  |               |           |          |         |              |        |                                             |
|------------------|---------------|-----------|----------|---------|--------------|--------|---------------------------------------------|
| Silver           | [Ag].[Ag]     | R2642971  | M2645220 | AUTO_13 | training set | Active | <i>Pimephales promelas</i>                  |
| Copper           | [Cu].[Cu]     | R9870398  | M2655006 | AUTO_5  | training set | Active | <i>Ceriodaphnia dubia</i>                   |
| Copper           | [Cu].[Cu]     | R21028078 | M2655006 | AUTO_53 | training set | Active | <i>Ceriodaphnia dubia</i>                   |
| Zinc oxide       | O=[Zn].O=[Zn] | R12182880 | M2652893 | AUTO_1  | training set | Active | <i>Escherichia coli</i>                     |
| Zinc oxide       | O=[Zn].O=[Zn] | R21028068 | M2652893 | AUTO_43 | training set | Active | <i>Escherichia coli</i>                     |
| Copper           | [Cu].[Cu]     | R21028079 | M2655006 | AUTO_54 | training set | Active | <i>Ceriodaphnia dubia</i>                   |
| Silver           | [Ag].[Ag]     | R2642972  | M2645220 | AUTO_14 | training set | Active | <i>Pimephales promelas</i>                  |
| Copper           | [Cu].[Cu]     | R9926573  | M2655006 | AUTO_3  | training set | Active | <i>Daphnia pulex</i>                        |
| Silver           | [Ag].[Ag]     | R2642973  | M2645220 | AUTO_15 | training set | Active | <i>Pimephales promelas</i>                  |
| Silver           | [Ag].[Ag]     | R2642974  | M2645220 | AUTO_16 | training set | Active | <i>Pimephales promelas</i>                  |
| Silver           | [Ag].[Ag]     | R2691537  | M2645220 | AUTO_15 | training set | Active | <i>Ceriodaphnia</i>                         |
| Silver           | [Ag].[Ag]     | R9895729  | M2645220 | AUTO_10 | training set | Active | <i>Ceriodaphnia dubia neonates</i>          |
| Silver           | [Ag].[Ag]     | R21028104 | M2645220 | AUTO_80 | training set | Active | <i>Ceriodaphnia dubia</i>                   |
| Silver           | [Ag].[Ag]     | R9727605  | M2645220 | AUTO_3  | training set | Active | <i>Thamnocephalus platyurus, freshwater</i> |
| Silver           | [Ag].[Ag]     | R2642976  | M2645220 | AUTO_18 | training set | Active | <i>Pimephales promelas</i>                  |
| Silver           | [Ag].[Ag]     | R9997788  | M2645220 | AUTO_3  | training set | Active | <i>Fathead Minnow</i>                       |
| Silver, colloid  | [Ag].[Ag]     | R9890169  | M2645220 | AUTO_1  | training set | Active | <i>Rainbow trout</i>                        |
| Silver           | [Ag].[Ag]     | R21028059 | M2645220 | AUTO_34 | training set | Active | <i>Pimephales promelas</i>                  |
| Silver           | [Ag].[Ag]     | R2642968  | M2645220 | AUTO_9  | training set | Active | <i>Daphnia magna</i>                        |
| Silver           | [Ag].[Ag]     | R9979591  | M2645220 | AUTO_3  | training set | Active | <i>Daphnia magna</i>                        |
| Zinc oxide       | O=[Zn].O=[Zn] | R21028069 | M2652893 | AUTO_44 | training set | Active | <i>Escherichia coli</i>                     |
| Zinc oxide       | O=[Zn].O=[Zn] | R9890186  | M2652893 | AUTO_5  | training set | Active | <i>Thamnocephalus platyurus</i>             |
| Zinc oxide       | O=[Zn].O=[Zn] | R12601997 | M2652893 | AUTO_5  | training set | Active | <i>Thamnocephalus platyurus</i>             |
| Copper(II) oxide | O=[Cu].O=[Cu] | R12182881 | M2652894 | AUTO_2  | training set | Active | <i>Escherichia coli</i>                     |
| Copper(II) oxide | O=[Cu].O=[Cu] | R21028064 | M2652894 | AUTO_39 | training set | Active | <i>Escherichia coli</i>                     |
| Silver           | [Ag].[Ag]     | R2691542  | M2645220 | AUTO_20 | training set | Active | <i>Chlamydomonas reinhardtii</i>            |
| Zinc oxide       | O=[Zn].O=[Zn] | R2707692  | M2652893 | AUTO_33 | training set | Active | <i>Thamnocephalus</i>                       |

|                  |                   |           |          |          |              |        |                                                         |
|------------------|-------------------|-----------|----------|----------|--------------|--------|---------------------------------------------------------|
|                  | Zn]               |           |          |          |              |        | <i>halus platyurus</i>                                  |
| Zinc oxide       | O=[Zn].O=[Zn]     | R12601994 | M2652893 | AUTO_2   | training set | Active | <i>Thamnocephalus platyurus</i>                         |
| Zinc oxide       | O=[Zn].O=[Zn]     | R12714707 | M2652893 | AUTO_2   | training set | Active | <i>Thamnocephalus platyurus</i> <sup>b</sup>            |
| Zinc oxide       | O=[Zn].O=[Zn]     | R21028259 | M2652893 | AUTO_236 | training set | Active | <i>Thamnocephalus platyurus</i>                         |
| Silver           | [Ag].[Ag]         | R2691540  | M2645220 | AUTO_18  | training set | Active | <i>Pseudokirchneriella subcapitata</i>                  |
| Silver           | [Ag].[Ag]         | R9895734  | M2645220 | AUTO_15  | training set | Active | <i>Pseudokirchneriella subcapitata</i>                  |
| Silver           | [Ag].[Ag]         | R9727604  | M2645220 | AUTO_2   | training set | Active | <i>Thamnocephalus platyurus</i> ,<br><i>river water</i> |
| Silver           | [Ag].[Ag]         | R21028089 | M2645220 | AUTO_64  | training set | Active | <i>Hypophthalmichthys molitrix</i>                      |
| Titanium dioxide | O=[Ti]=O.O=[Ti]=O | R9870378  | M2645228 | AUTO_4   | training set | Active | <i>Caenorhabditis elegans</i>                           |
| Zinc oxide       | O=[Zn].O=[Zn]     | R2707691  | M2652893 | AUTO_32  | training set | Active | <i>Thamnocephalus platyurus</i>                         |
| Silver           | [Ag].[Ag]         | R9890208  | M2645220 | AUTO_1   | training set | Active | <i>Rainbow trout</i> ,<br><i>eleutheroembryos</i>       |
| Silver           | [Ag].[Ag]         | R9727603  | M2645220 | AUTO_1   | training set | Active | <i>Thamnocephalus platyurus</i> ,<br><i>freshwater</i>  |
| Titanium dioxide | O=[Ti]=O.O=[Ti]=O | R9890211  | M2645228 | AUTO_1   | training set | Active | <i>Danio rerio</i>                                      |
| Silver           | [Ag].[Ag]         | R9727606  | M2645220 | AUTO_4   | training set | Active | <i>Thamnocephalus platyurus</i> ,<br><i>river water</i> |
| Nickel           | [Ni].[Ni]         | R9895737  | M2655007 | AUTO_18  | training set | Active | <i>Pseudokirchneriella subcapitata</i>                  |
| Silver           | [Ag].[Ag]         | R21028090 | M2645220 | AUTO_65  | training set | Active | <i>Hypophthalmichthys molitrix</i>                      |
| Titanium dioxide | O=[Ti]=O.O=[Ti]=O | R9870375  | M2645228 | AUTO_1   | training set | Active | <i>Daphnia magna</i>                                    |
| Copper           | [Cu].[Cu]         | R21028107 | M2655006 | AUTO_83  | training set | Active | <i>Ceriodaphnia dubia</i>                               |
| Silver           | [Ag].[Ag]         | R2691538  | M2645220 | AUTO_16  | training set | Active | <i>Ceriodaphnia dubia</i>                               |
| Copper(II) oxide | O=[Cu].O=[Cu]     | R21028233 | M2652894 | AUTO_210 | training set | Active | <i>Brachionus calyciflorus</i>                          |
| Copper           | [Cu].[Cu]         | R9895735  | M2655006 | AUTO_16  | training set | Active | <i>Pseudokirchneriella</i>                              |



|                   |                   |           |           |          |              |          |                                        |
|-------------------|-------------------|-----------|-----------|----------|--------------|----------|----------------------------------------|
|                   |                   |           |           |          |              |          | <i>subcapitata</i>                     |
| Nickel            | [Ni].[Ni]         | R9895733  | M2655007  | AUTO_14  | training set | Active   | <i>Ceriodaphnia dubia neonates</i>     |
| Nickel            | [Ni].[Ni]         | R9926576  | M2655007  | AUTO_6   | training set | Active   | <i>Ceriodaphnia dubia</i>              |
| Nickel            | [Ni].[Ni]         | R21028108 | M2655007  | AUTO_84  | training set | Active   | <i>Ceriodaphnia dubia</i>              |
| Silver            | [Ag].[Ag]         | R9890209  | M2645220  | AUTO_2   | training set | Active   | <i>Rainbow trout, larvae</i>           |
| Silver            | [Ag].[Ag]         | R2691541  | M2645220  | AUTO_19  | training set | Active   | <i>Chlamydomonas reinhardtii</i>       |
| Titanium          | O=[Ti]=O.O=[Ti]=O | R2646991  | M2645228  | AUTO_7   | training set | Active   | <i>Daphnia magna</i>                   |
| Copper            | [Cu].[Cu]         | R9895721  | M2655006  | AUTO_2   | training set | Active   | <i>Danio rerio</i>                     |
| Silver            | [Ag].[Ag]         | R21028092 | M2645220  | AUTO_67  | training set | Active   | <i>Hypophthalmichthys molitrix</i>     |
| Silver            | [Ag].[Ag]         | R21028201 | M2645220  | AUTO_177 | training set | Active   | <i>Oryzias latipes</i>                 |
| Copper            | [Cu].[Cu]         | R9926572  | M2655006  | AUTO_2   | training set | Active   | <i>Danio rerio</i>                     |
| Copper            | [Cu].[Cu]         | R21028115 | M2655006  | AUTO_91  | training set | Active   | <i>Danio rerio</i>                     |
| Copper(II) oxide  | O=[Cu].O=[Cu]     | R21028207 | M2652894  | AUTO_183 | training set | Active   | <i>Paramecium multimicronucleatum</i>  |
| Silver            | [Ag].[Ag]         | R2691558  | M2645220  | AUTO_36  | training set | Inactive | <i>Autotrophic nitrifying bacteria</i> |
| Silver            | [Ag].[Ag]         | R2691559  | M2645220  | AUTO_37  | training set | Inactive | <i>Nitrifying bacteria</i>             |
| Selenium          | [Se].[Se]         | R21028121 | M17788121 | AUTO_97  | training set | Inactive | <i>Oryzias latipes</i>                 |
| Zinc oxide        | O=[Zn].O=[Zn]     | R21028159 | M2652893  | AUTO_135 | training set | Inactive | <i>Daphnia magna</i>                   |
| Silver            | [Ag].[Ag]         | R9926262  | M2645220  | AUTO_1   | training set | Inactive | <i>Oryzias latipes</i>                 |
| Silver            | [Ag].[Ag]         | R21028120 | M2645220  | AUTO_96  | training set | Inactive | <i>Oryzias latipes</i>                 |
| Silver            | [Ag].[Ag]         | R21028202 | M2645220  | AUTO_178 | training set | Inactive | <i>Oryzias latipes</i>                 |
| Silver            | [Ag].[Ag]         | R21028049 | M2645220  | AUTO_24  | training set | Inactive | <i>Danio rerio</i>                     |
| Zinc oxide        | O=[Zn].O=[Zn]     | R9889292  | M2652893  | AUTO_6   | training set | Inactive | <i>Daphnia magna</i>                   |
| Silver            | [Ag].[Ag]         | R21028212 | M2645220  | AUTO_188 | training set | Inactive | <i>Pimephales promelas</i>             |
| Silver            | [Ag].[Ag]         | R9963620  | M2645220  | AUTO_2   | training set | Inactive | <i>Danio rerio embryos</i>             |
| Silver            | [Ag].[Ag]         | R21028216 | M2645220  | AUTO_192 | training set | Inactive | <i>Danio rerio</i>                     |
| Silver, sonicated | [Ag].[Ag]         | R9877332  | M2645220  | AUTO_4   | training set | Inactive | <i>Pimephales promelas embryos</i>     |
| Silver            | [Ag].[Ag]         | R21028203 | M2645220  | AUTO_179 | training set | Inactive | <i>Oryzias latipes</i>                 |
| Silver            | [Ag].[Ag]         | R21028191 | M2645220  | AUTO_167 | training set | Inactive | <i>Oryzias latipes</i>                 |
| Silver            | [Ag].[Ag]         | R21028070 | M2645220  | AUTO_45  | training set | Inactive | <i>Oryzias</i>                         |

|                  |                   |           |          |          |              |          |                                    |
|------------------|-------------------|-----------|----------|----------|--------------|----------|------------------------------------|
|                  |                   |           |          |          |              |          | <i>latipes</i>                     |
| Copper           | [Cu].[Cu]         | R9870393  | M2655006 | AUTO_1   | training set | Inactive | <i>Danio rerio</i>                 |
| Copper           | [Cu].[Cu]         | R9926550  | M2655006 | AUTO_4   | training set | Inactive | <i>Danio rerio</i>                 |
| Zinc oxide       | O=[Zn].O=[Zn]     | R21028160 | M2652893 | AUTO_136 | training set | Inactive | <i>Daphnia magna</i>               |
| Zinc oxide       | O=[Zn].O=[Zn]     | R12601996 | M2652893 | AUTO_4   | training set | Inactive | <i>Daphnia magna</i>               |
| Copper           | [Cu].[Cu]         | R9926574  | M2655006 | AUTO_4   | training set | Inactive | <i>Danio rerio</i>                 |
| Copper           | [Cu].[Cu]         | R21028124 | M2655006 | AUTO_100 | training set | Inactive | <i>Danio rerio</i>                 |
| Titanium         | O=[Ti]=O.O=[Ti]=O | R2647004  | M2645228 | AUTO_21  | training set | Inactive | <i>Daphnia magna</i>               |
| Cobalt           | [Co].[Co]         | R9895732  | M3728136 | AUTO_13  | training set | Inactive | <i>Ceriodaphnia dubia neonates</i> |
| Titanium dioxide | O=[Ti]=O.O=[Ti]=O | R12174312 | M2645228 | AUTO_3   | training set | Inactive | <i>Escherichia coli</i>            |
| Titanium dioxide | O=[Ti]=O.O=[Ti]=O | R12182882 | M2645228 | AUTO_3   | training set | Inactive | <i>Escherichia coli</i>            |
| Titanium dioxide | O=[Ti]=O.O=[Ti]=O | R21028066 | M2645228 | AUTO_41  | training set | Inactive | <i>Escherichia coli</i>            |
| Copper(II) oxide | O=[Cu].O=[Cu]     | R9890182  | M2652894 | AUTO_1   | training set | Inactive | <i>Thamnoplatus platyurus</i>      |
| Silver           | [Ag].[Ag]         | R9963619  | M2645220 | AUTO_1   | training set | Inactive | <i>Danio rerio embryos</i>         |
| Zinc oxide       | O=[Zn].O=[Zn]     | R12601999 | M2652893 | AUTO_7   | training set | Inactive | <i>Danio rerio</i>                 |
| Silver           | [Ag].[Ag]         | R21028217 | M2645220 | AUTO_193 | training set | Inactive | <i>Danio rerio</i>                 |
| Zinc oxide       | O=[Zn].O=[Zn]     | R12714708 | M2652893 | AUTO_3   | training set | Inactive | <i>Danio rerio</i>                 |
| Titanium         | O=[Ti]=O.O=[Ti]=O | R2647003  | M2645228 | AUTO_20  | training set | Inactive | <i>Daphnia magna</i>               |
| Zinc oxide       | O=[Zn].O=[Zn]     | R12602000 | M2652893 | AUTO_8   | training set | Inactive | <i>Danio rerio</i>                 |
| Copper(II) oxide | O=[Cu].O=[Cu]     | R2707722  | M2652894 | AUTO_63  | training set | Inactive | <i>Thamnocephalus platyurus</i>    |
| Copper(II) oxide | O=[Cu].O=[Cu]     | R9926580  | M2652894 | AUTO_10  | training set | Inactive | <i>Thamnocephalus platyurus</i>    |
| Zinc oxide       | O=[Zn].O=[Zn]     | R21028161 | M2652893 | AUTO_137 | training set | Inactive | <i>Daphnia magna</i>               |
| Zinc oxide       | O=[Zn].O=[Zn]     | R9890189  | M2652893 | AUTO_8   | training set | Inactive | <i>Thamnoplatus platyurus</i>      |
| Silver           | [Ag].[Ag]         | R9890210  | M2645220 | AUTO_3   | training set | Inactive | <i>Rainbow trout</i>               |
| Zinc oxide       | O=[Zn].O=[Zn]     | R12643422 | M2652893 | AUTO_5   | training set | Inactive | <i>Caenorhabditis elegans</i>      |
| Zinc oxide       | O=[Zn].O=[Zn]     | R21028244 | M2652893 | AUTO_221 | training set | Inactive | <i>Caenorhabditis elegans</i>      |
| Zinc oxide       | O=[Zn].O=[Zn]     | R9887903  | M2652893 | AUTO_1   | training set | Inactive | <i>Caenorhabditis elegans</i>      |
| Titanium dioxide | O=[Ti]=O.O=[Ti]=O | R21028187 | M2645228 | AUTO_163 | training set | Inactive | <i>Oryzias latipes</i>             |
| Zinc oxide       | O=[Zn].O=[Zn]     | R21028162 | M2652893 | AUTO_138 | training set | Inactive | <i>Daphnia magna</i>               |

|                  |                       |           |          |          |              |          |                                    |
|------------------|-----------------------|-----------|----------|----------|--------------|----------|------------------------------------|
| Titanium dioxide | O=[Ti]=O.O<br>=[Ti]=O | R21028223 | M2645228 | AUTO_199 | training set | Inactive | <i>Daphnia magna</i>               |
| Titanium dioxide | O=[Ti]=O.O<br>=[Ti]=O | R21028026 | M2645228 | AUTO_1   | training set | Inactive | <i>Ceriodaphnia dubia</i>          |
| Zinc oxide       | O=[Zn].O=[Zn]         | R12643420 | M2652893 | AUTO_3   | training set | Inactive | <i>Folsomia candida</i>            |
| Zinc oxide       | O=[Zn].O=[Zn]         | R9890187  | M2652893 | AUTO_6   | training set | Inactive | <i>Thamnoplatyurus platyurus</i>   |
| Copper(II) oxide | O=[Cu].O=[Cu]         | R2707713  | M2652894 | AUTO_54  | training set | Inactive | <i>Daphnia magna</i>               |
| Zinc oxide       | O=[Zn].O=[Zn]         | R9926577  | M2652893 | AUTO_7   | training set | Inactive | <i>Daphnia magna</i>               |
| Copper(II) oxide | O=[Cu].O=[Cu]         | R9926578  | M2652894 | AUTO_8   | training set | Inactive | <i>Daphnia magna</i>               |
| Zinc oxide       | O=[Zn].O=[Zn]         | R12601993 | M2652893 | AUTO_1   | training set | Inactive | <i>Daphnia magna</i>               |
| Copper(II) oxide | O=[Cu].O=[Cu]         | R12714709 | M2652894 | AUTO_4   | training set | Inactive | <i>Daphnia magna</i>               |
| Copper(II) oxide | O=[Cu].O=[Cu]         | R21028231 | M2652894 | AUTO_208 | training set | Inactive | <i>Nitellopsis obtusa</i>          |
| Silver           | [Ag].[Ag]             | R21028071 | M2645220 | AUTO_46  | training set | Inactive | <i>Oryzias latipes</i>             |
| Titanium dioxide | O=[Ti]=O.O<br>=[Ti]=O | R21028027 | M2645228 | AUTO_2   | training set | Inactive | <i>Ceriodaphnia dubia</i>          |
| Copper           | [Cu].[Cu]             | R11895743 | M2655006 | AUTO_46  | training set | Inactive | <i>Danio rerio</i>                 |
| Nickel           | [Ni].[Ni]             | R9895728  | M2655007 | AUTO_9   | training set | Inactive | <i>Daphnia pulex</i>               |
| Nickel           | [Ni].[Ni]             | R9926575  | M2655007 | AUTO_5   | training set | Inactive | <i>Daphnia pulex</i>               |
| Zinc oxide       | O=[Zn].O=[Zn]         | R21028053 | M2652893 | AUTO_28  | training set | Inactive | <i>Danio rerio</i>                 |
| Aluminium        | [Al].[Al]             | R9895731  | M3728130 | AUTO_12  | training set | Inactive | <i>Ceriodaphnia dubia neonates</i> |
| Aluminium        | [Al].[Al]             | R21028105 | M3728130 | AUTO_81  | training set | Inactive | <i>Ceriodaphnia dubia</i>          |
| Copper           | [Cu].[Cu]             | R11895742 | M2655006 | AUTO_45  | training set | Inactive | <i>Danio rerio</i>                 |
| Copper(II) oxide | O=[Cu].O=[Cu]         | R21028065 | M2652894 | AUTO_40  | training set | Inactive | <i>Escherichia coli</i>            |
| Zinc oxide       | O=[Zn].O=[Zn]         | R21028102 | M2652893 | AUTO_78  | training set | Inactive | <i>Danio rerio</i>                 |
| Titanium dioxide | O=[Ti]=O.O<br>=[Ti]=O | R21028270 | M2645228 | AUTO_247 | training set | Inactive | <i>Brachionus plicatilis</i>       |
| Silver           | [Ag].[Ag]             | R9848059  | M2645220 | AUTO_1   | training set | Inactive | <i>Moina macrocopa</i>             |
| Silver           | [Ag].[Ag]             | R2691539  | M2645220 | AUTO_17  | training set | Inactive | <i>Ceriodaphnia dubia</i>          |
| Silver           | [Ag].[Ag]             | R2691527  | M2645220 | AUTO_5   | training set | Inactive | <i>Zebrafish</i>                   |
| Silver           | [Ag].[Ag]             | R9926571  | M2645220 | AUTO_1   | training set | Inactive | <i>Danio rerio</i>                 |
| Silver           | [Ag].[Ag]             | R21028112 | M2645220 | AUTO_88  | training set | Inactive | <i>Danio rerio</i>                 |
| Silver           | [Ag].[Ag]             | R9895720  | M2645220 | AUTO_1   | training set | Inactive | <i>Danio rerio</i>                 |
| Zinc oxide       | O=[Zn].O=[Zn]         | R12601995 | M2652893 | AUTO_3   | training set | Inactive | <i>Daphnia magna</i>               |
| Titanium dioxide | O=[Ti]=O.O<br>=[Ti]=O | R9876464  | M2645228 | AUTO_2   | training set | Inactive | <i>Ceriodaphnia dubia</i>          |
| Titanium         | O=[Ti]=O.O            | R9890207  | M2645228 | AUTO_2   | training set | Inactive | <i>Daphnia</i>                     |

|                  |                       |           |          |          |              |          |                                        |
|------------------|-----------------------|-----------|----------|----------|--------------|----------|----------------------------------------|
| dioxide          | =[Ti]=O               |           |          |          |              |          | <i>magna neonates</i>                  |
| Titanium dioxide | O=[Ti]=O.O<br>=[Ti]=O | R21028266 | M2645228 | AUTO_243 | training set | Inactive | <i>Daphnia magna</i>                   |
| Aluminium        | [Al].[Al]             | R9895736  | M3728130 | AUTO_17  | training set | Inactive | <i>Pseudokirchneriella subcapitata</i> |
| Zinc oxide       | O=[Zn].O=[Zn]         | R2707682  | M2652893 | AUTO_23  | training set | Inactive | <i>Daphnia magna</i>                   |
| Titanium dioxide | O=[Ti]=O.O<br>=[Ti]=O | R9876465  | M2645228 | AUTO_3   | training set | Inactive | <i>Daphnia pulex</i>                   |
| Silver, stirred  | [Ag].[Ag]             | R9877329  | M2645220 | AUTO_1   | training set | Inactive | <i>Pimephales promelas embryos</i>     |
| Silver           | [Ag].[Ag]             | R9889345  | M2645220 | AUTO_2   | training set | Inactive | <i>Danio rerio embryos</i>             |
| Titanium dioxide | O=[Ti]=O.O<br>=[Ti]=O | R21028272 | M2645228 | AUTO_249 | training set | Inactive | <i>Brachionus plicatilis</i>           |
| Silver, stirred  | [Ag].[Ag]             | R9877330  | M2645220 | AUTO_2   | training set | Inactive | <i>Pimephales promelas embryos</i>     |
| Copper(II) oxide | O=[Cu].O=[Cu]         | R21028232 | M2652894 | AUTO_209 | training set | Inactive | <i>Thamnocephalus platyurus</i>        |
| cerium oxide     | O=[Ce]=O.<br>O=[Ce]=O | R21028042 | M2659378 | AUTO_17  | training set | Inactive | <i>Daphnia magna</i>                   |
| Silver           | [Ag].[Ag]             | R21028144 | M2645220 | AUTO_120 | training set | Inactive | <i>Oreochromis mossambicus</i>         |
| Titanium dioxide | O=[Ti]=O.O<br>=[Ti]=O | R21028032 | M2645228 | AUTO_7   | training set | Inactive | <i>Daphnia pulex</i>                   |
| Titanium dioxide | O=[Ti]=O.O<br>=[Ti]=O | R21028271 | M2645228 | AUTO_248 | training set | Inactive | <i>Brachionus plicatilis</i>           |
| Titanium dioxide | O=[Ti]=O.O<br>=[Ti]=O | R21028174 | M2645228 | AUTO_150 | training set | Inactive | <i>Escherichia coli</i>                |
| Titanium dioxide | O=[Ti]=O.O<br>=[Ti]=O | R21028030 | M2645228 | AUTO_5   | training set | Inactive | <i>Ceriodaphnia dubia</i>              |
| Silver           | [Ag].[Ag]             | R2691545  | M2645220 | AUTO_23  | training set | Inactive | <i>Paramecium caudatum</i>             |
| Titanium dioxide | O=[Ti]=O.O<br>=[Ti]=O | R21028044 | M2645228 | AUTO_19  | training set | Inactive | <i>Daphnia magna</i>                   |
| Silver           | [Ag].[Ag]             | R2691530  | M2645220 | AUTO_8   | training set | Inactive | <i>Zebrafish</i>                       |
| Silver           | [Ag].[Ag]             | R9890190  | M2645220 | AUTO_1   | training set | Inactive | <i>Danio rerio</i>                     |
| Titanium dioxide | O=[Ti]=O.O<br>=[Ti]=O | R21028183 | M2645228 | AUTO_159 | training set | Inactive | <i>Danio rerio</i>                     |
| Zinc oxide       | O=[Zn].O=[Zn]         | R21028153 | M2652893 | AUTO_129 | training set | Inactive | <i>Escherichia coli</i>                |
| Silver           | [Ag].[Ag]             | R9889347  | M2645220 | AUTO_4   | training set | Inactive | <i>Danio rerio embryos</i>             |
| Zinc oxide       | O=[Zn].O=[Zn]         | R9926551  | M2652893 | AUTO_5   | training set | Inactive | <i>Danio rerio embryos</i>             |
| Copper           | [Cu].[Cu]             | R11895744 | M2655006 | AUTO_47  | training set | Inactive | <i>Danio rerio eggs</i>                |
| Copper           | [Cu].[Cu]             | R11895745 | M2655006 | AUTO_48  | training set | Inactive | <i>Danio rerio eggs</i>                |
| Silver           | [Ag].[Ag]             | R2691531  | M2645220 | AUTO_9   | training set | Inactive | <i>Zebrafish</i>                       |
| Silver           | [Ag].[Ag]             | R2691532  | M2645220 | AUTO_10  | training set | Inactive | <i>Zebrafish</i>                       |

|                  |                                               |           |          |          |              |          |                               |
|------------------|-----------------------------------------------|-----------|----------|----------|--------------|----------|-------------------------------|
| Silver           | [Ag].[Ag]                                     | R9890192  | M2645220 | AUTO_3   | training set | Inactive | <i>Danio rerio</i>            |
| Silver           | [Ag].[Ag]                                     | R2691533  | M2645220 | AUTO_11  | training set | Inactive | <i>Zebrafish</i>              |
| Zinc oxide       | O=[Zn].O=[Zn]                                 | R2707287  | M2652893 | AUTO_2   | training set | Inactive | <i>Zebrafish</i>              |
| Titanium dioxide | O=[Ti]=O.O=[Ti]=O                             | R21028184 | M2645228 | AUTO_160 | training set | Inactive | <i>Danio rerio</i>            |
| Cobalt(II) oxide | O=[Co].O=[Co].O=[Co]<br>O[Co]=O.O=[Co]O[Co]=O | R12174313 | M4394264 | AUTO_4   | training set | Inactive | <i>Escherichia coli</i>       |
| Cobalt(II) oxide | O=[Co].O=[Co].O=[Co]<br>O[Co]=O.O=[Co]O[Co]=O | R12182883 | M4394264 | AUTO_4   | training set | Inactive | <i>Escherichia coli</i>       |
| Silver           | [Ag].[Ag]                                     | R21028155 | M2645220 | AUTO_131 | training set | Inactive | <i>Paramecium caudatum</i>    |
| cerium oxide     | O=[Ce]=O.O=[Ce]=O                             | R21028132 | M2659378 | AUTO_108 | training set | Inactive | <i>Daphnia magna</i>          |
| Silver           | [Ag].[Ag]                                     | R9889339  | M2645220 | AUTO_1   | training set | Inactive | <i>Danio rerio embryos</i>    |
| Silver           | [Ag].[Ag]                                     | R21028156 | M2645220 | AUTO_132 | training set | Inactive | <i>Paramecium caudatum</i>    |
| Silver           | [Ag].[Ag]                                     | R21028157 | M2645220 | AUTO_133 | training set | Inactive | <i>Paramecium caudatum</i>    |
| Silver           | [Ag].[Ag]                                     | R9889344  | M2645220 | AUTO_1   | training set | Inactive | <i>Danio rerio embryos</i>    |
| cerium oxide     | O=[Ce]=O.O=[Ce]=O                             | R21028131 | M2659378 | AUTO_107 | training set | Inactive | <i>Daphnia magna</i>          |
| Titanium dioxide | O=[Ti]=O.O=[Ti]=O                             | R21028179 | M2645228 | AUTO_155 | training set | Inactive | <i>Escherichia coli</i>       |
| Iron(III) oxide  | O=[Fe]O[Fe]=O.O=[Fe]O[Fe]=O                   | R21028230 | M2652899 | AUTO_207 | training set | Inactive | <i>Danio rerio</i>            |
| Silver           | [Ag].[Ag]                                     | R21028158 | M2645220 | AUTO_134 | training set | Inactive | <i>Caenorhabditis elegans</i> |
| Cobalt(II) oxide | O=[Co].O=[Co].O=[Co]<br>O[Co]=O.O=[Co]O[Co]=O | R21028063 | M4394264 | AUTO_38  | training set | Inactive | <i>Escherichia coli</i>       |
| Copper(II) oxide | O=[Cu].O=[Cu]                                 | R21028148 | M2652894 | AUTO_124 | training set | Inactive | <i>Escherichia coli</i>       |
| Titanium         | O=[Ti]=O.O=[Ti]=O                             | R2645347  | M2645228 | AUTO_6   | training set | Inactive | <i>Daphnia magna</i>          |
| cerium oxide     | O=[Ce]=O.O=[Ce]=O                             | R21028133 | M2659378 | AUTO_109 | training set | Inactive | <i>Daphnia magna</i>          |
| Aluminium oxide  | O=[Al]O[Al]=O.O=[Al]O[Al]=O                   | R21028050 | M2652898 | AUTO_25  | training set | Inactive | <i>Ceriodaphnia dubia</i>     |
| Copper(II) oxide | O=[Cu].O=[Cu]                                 | R9890184  | M2652894 | AUTO_3   | training set | Inactive | <i>Thamnoplatus platyurus</i> |
| Titanium dioxide | O=[Ti]=O.O=[Ti]=O                             | R21028243 | M2645228 | AUTO_220 | training set | Inactive | <i>Caenorhabditis elegans</i> |
| Titanium dioxide | O=[Ti]=O.O=[Ti]=O                             | R9887905  | M2645228 | AUTO_3   | training set | Inactive | <i>Caenorhabditis elegans</i> |

|                     |                                      |           |          |          |              |          |                                 |
|---------------------|--------------------------------------|-----------|----------|----------|--------------|----------|---------------------------------|
| Titanium dioxide    | O=[Ti]=O.O<br>=[Ti]=O                | R12643418 | M2645228 | AUTO_1   | training set | Inactive | <i>Caenorhabditis elegans</i>   |
| Aluminium oxide     | O=[Al]O[Al]<br>]=O.O=[Al]<br>O[Al]=O | R21028242 | M2652898 | AUTO_219 | training set | Inactive | <i>Caenorhabditis elegans</i>   |
| Aluminium oxide     | O=[Al]O[Al]<br>]=O.O=[Al]<br>O[Al]=O | R12643419 | M2652898 | AUTO_2   | training set | Inactive | <i>Caenorhabditis elegans</i>   |
| Aluminium oxide     | O=[Al]O[Al]<br>]=O.O=[Al]<br>O[Al]=O | R21028051 | M2652898 | AUTO_26  | training set | Inactive | <i>Ceriodaphnia dubia</i>       |
| Copper(II) oxide    | O=[Cu].O=[<br>Cu]                    | R2707721  | M2652894 | AUTO_62  | training set | Inactive | <i>Thamnocephalus platyurus</i> |
| Titanium dioxide    | O=[Ti]=O.O<br>=[Ti]=O                | R21028180 | M2645228 | AUTO_156 | training set | Inactive | <i>Danio rerio</i>              |
| Nickel              | [Ni].[Ni]                            | R9926558  | M2655007 | AUTO_12  | training set | Inactive | <i>Danio rerio</i> embryos      |
| Aluminium oxide     | O=[Al]O[Al]<br>]=O.O=[Al]<br>O[Al]=O | R21028052 | M2652898 | AUTO_27  | training set | Inactive | <i>Ceriodaphnia dubia</i>       |
| Titanium            | O=[Ti]=O.O<br>=[Ti]=O                | R2692112  | M2645228 | AUTO_16  | training set | Inactive | <i>Zebrafish</i>                |
| Titanium dioxide    | O=[Ti]=O.O<br>=[Ti]=O                | R21028101 | M2645228 | AUTO_77  | training set | Inactive | <i>Danio rerio</i>              |
| Titanium dioxide    | O=[Ti]=O.O<br>=[Ti]=O                | R21028185 | M2645228 | AUTO_161 | training set | Inactive | <i>Danio rerio</i>              |
| Titanium dioxide    | O=[Ti]=O.O<br>=[Ti]=O                | R21028173 | M2645228 | AUTO_149 | training set | Inactive | <i>Escherichia coli</i>         |
| Magnesium(II) oxide | O=[Mg].O=[<br>Mg]                    | R11895725 | M4394239 | AUTO_21  | training set | Inactive | <i>Danio rerio</i>              |
| Magnesium(II) oxide | O=[Mg].O=[<br>Mg]                    | R11895726 | M4394239 | AUTO_22  | training set | Inactive | <i>Danio rerio</i>              |
| Titanium dioxide    | O=[Ti]=O.O<br>=[Ti]=O                | R9889289  | M2645228 | AUTO_3   | training set | Inactive | <i>Daphnia magna</i>            |
| Titanium dioxide    | O=[Ti]=O.O<br>=[Ti]=O                | R21028188 | M2645228 | AUTO_164 | training set | Inactive | <i>Oryzias latipes</i>          |
| Aluminium oxide     | O=[Al]O[Al]<br>]=O.O=[Al]<br>O[Al]=O | R9889287  | M2652898 | AUTO_1   | training set | Inactive | <i>Daphnia magna</i>            |
| Copper(II) oxide    | O=[Cu].O=[<br>Cu]                    | R2707712  | M2652894 | AUTO_53  | training set | Inactive | <i>Daphnia magna</i>            |
| Titanium dioxide    | O=[Ti]=O.O<br>=[Ti]=O                | R21028175 | M2645228 | AUTO_151 | training set | Inactive | <i>Escherichia coli</i>         |
| Nickel              | [Ni].[Ni]                            | R9926557  | M2655007 | AUTO_11  | training set | Inactive | <i>Danio rerio</i> embryos      |
| Silicon dioxide     | O=[Si]=O.O<br>=[Si]=O                | R21028116 | M2652900 | AUTO_92  | training set | Inactive | <i>Danio rerio</i>              |
| Calcium(II) oxide   | O=[Ca].O=[<br>Ca]                    | R11895737 | M4394240 | AUTO_37  | training set | Inactive | <i>Danio rerio</i>              |
| Titanium dioxide    | O=[Ti]=O.O<br>=[Ti]=O                | R21028273 | M2645228 | AUTO_250 | training set | Inactive | <i>Brachionus plicatilis</i>    |
| Titanium dioxide    | O=[Ti]=O.O<br>=[Ti]=O                | R21028181 | M2645228 | AUTO_157 | training set | Inactive | <i>Danio rerio</i>              |
| Calcium(II) oxide   | O=[Ca].O=[<br>Ca]                    | R11895739 | M4394240 | AUTO_39  | training set | Inactive | <i>Danio rerio</i> eggs         |
| Calcium(II) oxide   | O=[Ca].O=[<br>Ca]                    | R11895740 | M4394240 | AUTO_40  | training set | Inactive | <i>Danio rerio</i> eggs         |
| Titanium            | O=[Ti]=O.O                           | R21028182 | M2645228 | AUTO_158 | training set | Inactive | <i>Danio rerio</i>              |

|                  |                                      |           |          |          |              |          |                                       |
|------------------|--------------------------------------|-----------|----------|----------|--------------|----------|---------------------------------------|
| dioxide          | =[Ti]=O                              |           |          |          |              |          |                                       |
| Aluminium oxide  | O=[Al]O[Al]<br>]=O.O=[Al]<br>O[Al]=O | R21028147 | M2652898 | AUTO_123 | training set | Inactive | <i>Escherichia coli</i>               |
| Nickel           | [Ni].[Ni]                            | R9926555  | M2655007 | AUTO_9   | training set | Inactive | <i>Danio rerio embryos</i>            |
| Nickel           | [Ni].[Ni]                            | R9926556  | M2655007 | AUTO_10  | training set | Inactive | <i>Danio rerio embryos</i>            |
| Copper(II) oxide | O=[Cu].O=[Cu]                        | R11895718 | M2652894 | AUTO_14  | training set | Inactive | <i>Danio rerio</i>                    |
| Silicon dioxide  | O=[Si]=O.O<br>=[Si]=O                | R21028209 | M2652900 | AUTO_185 | training set | Inactive | <i>Paramecium multimicronucleatum</i> |
| Lanthanum oxide  | O=[La]O[La]<br>]=O.O=[La]<br>O[La]=O | R21028150 | M2652906 | AUTO_126 | training set | Inactive | <i>Escherichia coli</i>               |
| Titanium dioxide | O=[Ti]=O.O<br>=[Ti]=O                | R9876463  | M2645228 | AUTO_1   | training set | Inactive | <i>fathead minnow</i>                 |
| Titanium         | O=[Ti]=O.O<br>=[Ti]=O                | R2645343  | M2645228 | AUTO_2   | training set | Inactive | <i>Daphnia magna</i>                  |
| Zinc oxide       | O=[Zn].O=[Zn]                        | R21028210 | M2652893 | AUTO_186 | training set | Inactive | <i>Paramecium multimicronucleatum</i> |
| Titanium dioxide | O=[Ti]=O.O<br>=[Ti]=O                | R21028067 | M2645228 | AUTO_42  | training set | Inactive | <i>Escherichia coli</i>               |
| Iron(III) oxide  | O=[Fe]O[Fe]<br>]=O.O=[Fe]<br>O[Fe]=O | R21028149 | M2652899 | AUTO_125 | training set | Inactive | <i>Escherichia coli</i>               |
| Zinc oxide       | O=[Zn].O=[Zn]                        | R9879033  | M2652893 | AUTO_1   | training set | Inactive | <i>Caenorhabditis elegans</i>         |
| Tin              | [Sn].[Sn]                            | R11895762 | M4394242 | AUTO_65  | training set | Inactive | <i>Danio rerio</i>                    |
| Tin              | [Sn].[Sn]                            | R11895763 | M4394242 | AUTO_66  | training set | Inactive | <i>Danio rerio</i>                    |
| Tin              | [Sn].[Sn]                            | R11895764 | M4394242 | AUTO_67  | training set | Inactive | <i>Danio rerio eggs</i>               |
| Zinc oxide       | O=[Zn].O=[Zn]                        | R12643423 | M2652893 | AUTO_6   | training set | Inactive | <i>Caenorhabditis elegans</i>         |
| Copper(II) oxide | O=[Cu].O=[Cu]                        | R11895720 | M2652894 | AUTO_16  | training set | Inactive | <i>Danio rerio eggs</i>               |
| Copper(II) oxide | O=[Cu].O=[Cu]                        | R12584191 | M2652894 | AUTO_2   | training set | Inactive | <i>Leptocheirus plumulosus</i>        |
| Titanium         | O=[Ti]=O.O<br>=[Ti]=O                | R2645345  | M2645228 | AUTO_4   | training set | Inactive | <i>Daphnia magna</i>                  |
| Zinc oxide       | O=[Zn].O=[Zn]                        | R21028235 | M2652893 | AUTO_212 | training set | Inactive | <i>Caenorhabditis elegans</i>         |
| Silver           | [Ag].[Ag]                            | R2691526  | M2645220 | AUTO_4   | training set | Inactive | <i>Zebrafish</i>                      |
| Copper(II) oxide | O=[Cu].O=[Cu]                        | R9890185  | M2652894 | AUTO_4   | training set | Inactive | <i>Thamnoplatus platyurus</i>         |
| Tin dioxide      | O=[Sn]=O.<br>O=[Sn]=O                | R21028151 | M2652902 | AUTO_127 | training set | Inactive | <i>Escherichia coli</i>               |
| Zinc oxide       | O=[Zn].O=[Zn]                        | R9890213  | M2652893 | AUTO_3   | training set | Inactive | <i>Danio rerio</i>                    |
| Zinc oxide       | O=[Zn].O=[Zn]                        | R21028234 | M2652893 | AUTO_211 | training set | Inactive | <i>Caenorhabditis elegans</i>         |
| Titanium dioxide | O=[Ti]=O.O<br>=[Ti]=O                | R12714711 | M2645228 | AUTO_6   | training set | Inactive | <i>Daphnia magna</i>                  |
| Silver           | [Ag].[Ag]                            | R21028269 | M2645220 | AUTO_246 | training set | Inactive | <i>Meloidogyn</i>                     |

|                  |               |           |          |          |          |        |                                  |
|------------------|---------------|-----------|----------|----------|----------|--------|----------------------------------|
|                  |               |           |          |          |          |        | <i>e incognita</i>               |
| Silver, colloid  | [Ag].[Ag]     | R9889880  | M2645220 | AUTO_10  | test set | Active | <i>Danio rerio</i>               |
| Silver           | [Ag].[Ag]     | R21028073 | M2645220 | AUTO_48  | test set | Active | <i>Ceriodaphnia dubia</i>        |
| Silver           | [Ag].[Ag]     | R21028075 | M2645220 | AUTO_50  | test set | Active | <i>Ceriodaphnia dubia</i>        |
| Silver           | [Ag].[Ag]     | R9879042  | M2645220 | AUTO_6   | test set | Active | <i>Daphnia magna</i>             |
| Silver           | [Ag].[Ag]     | R21028095 | M2645220 | AUTO_71  | test set | Active | <i>Daphnia magna</i>             |
| Silver           | [Ag].[Ag]     | R21028096 | M2645220 | AUTO_72  | test set | Active | <i>Daphnia magna</i>             |
| Nickel(II) oxide | O=[Ni].O=[Ni] | R9870392  | M2652904 | AUTO_18  | test set | Active | <i>Ceriodaphnia dubia</i>        |
| Copper           | [Cu].[Cu]     | R9870397  | M2655006 | AUTO_4   | test set | Active | <i>Ceriodaphnia dubia</i>        |
| Nickel(II) oxide | O=[Ni].O=[Ni] | R9870391  | M2652904 | AUTO_17  | test set | Active | <i>Daphnia pulex</i>             |
| Silver           | [Ag].[Ag]     | R21028200 | M2645220 | AUTO_176 | test set | Active | <i>Daphnia magna</i>             |
| Silver           | [Ag].[Ag]     | R2642964  | M2645220 | AUTO_5   | test set | Active | <i>Daphnia magna</i>             |
| Zinc oxide       | O=[Zn].O=[Zn] | R9870390  | M2652893 | AUTO_16  | test set | Active | <i>Caenorhabditis elegans</i>    |
| Silver, colloid  | [Ag].[Ag]     | R9889872  | M2645220 | AUTO_2   | test set | Active | <i>Danio rerio</i>               |
| Silver           | [Ag].[Ag]     | R21028280 | M2645220 | AUTO_257 | test set | Active | <i>Daphnia magna</i>             |
| Silver           | [Ag].[Ag]     | R21028194 | M2645220 | AUTO_170 | test set | Active | <i>Daphnia magna</i>             |
| Silver           | [Ag].[Ag]     | R21028197 | M2645220 | AUTO_173 | test set | Active | <i>Daphnia magna</i>             |
| Silver oxide     | O=[Ag].O=[Ag] | R9876468  | M3728112 | AUTO_3   | test set | Active | <i>Daphnia magna</i>             |
| Silver, colloid  | [Ag].[Ag]     | R9889875  | M2645220 | AUTO_5   | test set | Active | <i>Danio rerio</i>               |
| Silver           | [Ag].[Ag]     | R9889041  | M2645220 | AUTO_1   | test set | Active | <i>Daphnia magna</i>             |
| Silver           | [Ag].[Ag]     | R9879047  | M2645220 | AUTO_11  | test set | Active | <i>Daphnia magna</i>             |
| Zinc oxide       | O=[Zn].O=[Zn] | R12174310 | M2652893 | AUTO_1   | test set | Active | <i>Escherichia coli</i>          |
| Copper           | [Cu].[Cu]     | R9895727  | M2655006 | AUTO_8   | test set | Active | <i>Daphnia pulex</i>             |
| Silver           | [Ag].[Ag]     | R9877328  | M2645220 | AUTO_2   | test set | Active | <i>Oryzias latipes</i>           |
| Silver           | [Ag].[Ag]     | R2650124  | M2645220 | AUTO_2   | test set | Active | <i>Zebra danio</i>               |
| Silver           | [Ag].[Ag]     | R2642975  | M2645220 | AUTO_17  | test set | Active | <i>Pimephales promelas</i>       |
| Copper(II) oxide | O=[Cu].O=[Cu] | R12174311 | M2652894 | AUTO_2   | test set | Active | <i>Escherichia coli</i>          |
| Zinc oxide       | O=[Zn].O=[Zn] | R9926579  | M2652893 | AUTO_9   | test set | Active | <i>Thamnocephalus platyurus</i>  |
| Zinc oxide       | O=[Zn].O=[Zn] | R9890188  | M2652893 | AUTO_7   | test set | Active | <i>Thamnoplatyurus platyurus</i> |



|                   |                                                       |           |          |          |          |          |                                       |
|-------------------|-------------------------------------------------------|-----------|----------|----------|----------|----------|---------------------------------------|
| Iron(II,III)oxide | O=[Fe].O=[Fe].O=[Fe]<br>O[Fe]=O.O<br>=[Fe]O[Fe]<br>=O | R21028043 | M2659379 | AUTO_18  | test set | Active   | <i>Daphnia magna</i>                  |
| Aluminium oxide   | O=[Al]O[Al]<br>]=O.O=[Al]<br>O[Al]=O                  | R9870379  | M2652898 | AUTO_5   | test set | Active   | <i>Caenorhabditis elegans</i>         |
| Copper            | [Cu].[Cu]                                             | R9895730  | M2655006 | AUTO_11  | test set | Active   | <i>Ceriodaphnia dubia neonates</i>    |
| Silver            | [Ag].[Ag]                                             | R21028091 | M2645220 | AUTO_66  | test set | Active   | <i>Hypophthalmichthys molitrix</i>    |
| Copper            | [Cu].[Cu]                                             | R21028114 | M2655006 | AUTO_90  | test set | Active   | <i>Danio rerio</i>                    |
| Iron(III)oxide    | O=[Fe]O[Fe]<br>]=O.O=[Fe]<br>O[Fe]=O                  | R21028208 | M2652899 | AUTO_184 | test set | Active   | <i>Paramecium multimicronucleatum</i> |
| Copper(II)oxide   | O=[Cu].O=[Cu]                                         | R9866147  | M2652894 | AUTO_1   | test set | Active   | <i>Daphnia magna</i>                  |
| Silver            | [Ag].[Ag]                                             | R9890798  | M2645220 | AUTO_1   | test set | Inactive | <i>Oryzias latipes</i>                |
| Silver, sonicated | [Ag].[Ag]                                             | R9877331  | M2645220 | AUTO_3   | test set | Inactive | <i>Pimephales promelas embryos</i>    |
| Zinc oxide        | O=[Zn].O=[Zn]                                         | R21028281 | M2652893 | AUTO_258 | test set | Inactive | <i>Daphnia magna</i>                  |
| Zinc oxide        | O=[Zn].O=[Zn]                                         | R9866148  | M2652893 | AUTO_2   | test set | Inactive | <i>Daphnia magna</i>                  |
| Zinc oxide        | O=[Zn].O=[Zn]                                         | R9889291  | M2652893 | AUTO_5   | test set | Inactive | <i>Daphnia magna</i>                  |
| Cobalt            | [Co].[Co]                                             | R21028106 | M3728136 | AUTO_82  | test set | Inactive | <i>Ceriodaphnia dubia</i>             |
| Zinc oxide        | O=[Zn].O=[Zn]                                         | R12643421 | M2652893 | AUTO_4   | test set | Inactive | <i>Eisenia veneta</i>                 |
| Zinc oxide        | O=[Zn].O=[Zn]                                         | R21028054 | M2652893 | AUTO_29  | test set | Inactive | <i>Danio rerio</i>                    |
| Copper(II)oxide   | O=[Cu].O=[Cu]                                         | R12714710 | M2652894 | AUTO_5   | test set | Inactive | <i>Thamnocephalus platyurus</i>       |
| Titanium dioxide  | O=[Ti]=O.O<br>=[Ti]=O                                 | R21028177 | M2645228 | AUTO_153 | test set | Inactive | <i>Escherichia coli</i>               |
| Titanium dioxide  | O=[Ti]=O.O<br>=[Ti]=O                                 | R21028178 | M2645228 | AUTO_154 | test set | Inactive | <i>Escherichia coli</i>               |
| Zinc oxide        | O=[Zn].O=[Zn]                                         | R2707683  | M2652893 | AUTO_24  | test set | Inactive | <i>Daphnia magna</i>                  |
| Zinc oxide        | O=[Zn].O=[Zn]                                         | R12714706 | M2652893 | AUTO_1   | test set | Inactive | <i>Daphnia magna</i>                  |
| Titanium          | O=[Ti]=O.O<br>=[Ti]=O                                 | R2646990  | M2645228 | AUTO_6   | test set | Inactive | <i>Daphnia magna</i>                  |
| Zinc oxide        | O=[Zn].O=[Zn]                                         | R12601998 | M2652893 | AUTO_6   | test set | Inactive | <i>Danio rerio</i>                    |
| Zinc oxide        | O=[Zn].O=[Zn]                                         | R2707288  | M2652893 | AUTO_3   | test set | Inactive | <i>Zebrafish</i>                      |
| Titanium dioxide  | O=[Ti]=O.O<br>=[Ti]=O                                 | R21028031 | M2645228 | AUTO_6   | test set | Inactive | <i>Daphnia pulex</i>                  |
| Silver            | [Ag].[Ag]                                             | R21028113 | M2645220 | AUTO_89  | test set | Inactive | <i>Danio rerio</i>                    |
| Silver            | [Ag].[Ag]                                             | R9889346  | M2645220 | AUTO_3   | test set | Inactive | <i>Danio rerio embryos</i>            |



|  |  |  |  |  |  |  |                |
|--|--|--|--|--|--|--|----------------|
|  |  |  |  |  |  |  | <i>Stratus</i> |
|--|--|--|--|--|--|--|----------------|

242

243

Table S8. Detailed information of the EC50 data used for building nano-SARs

| Information of nanoparticles in the Online Chemical Modeling Environment (OCHEM) platform |               |                    |                      |                       | Sub-dataset  | Classification (threshold value 10.0 mg/L) | Species tested                         |
|-------------------------------------------------------------------------------------------|---------------|--------------------|----------------------|-----------------------|--------------|--------------------------------------------|----------------------------------------|
| Material Nanoparticles of Elements                                                        | SMILES        | RECORD ID in OCHEM | MOLECULE ID in OCHEM | Identifier in article |              |                                            |                                        |
| Silver                                                                                    | [Ag].[Ag]     | R21027757          | M2645220             | AUTO_124              | training set | Active                                     | <i>Daphnia magna</i>                   |
| Silver                                                                                    | [Ag].[Ag]     | R9877325           | M2645220             | AUTO_1                | training set | Active                                     | <i>Daphnia magna</i>                   |
| Silver                                                                                    | [Ag].[Ag]     | R9979588           | M2645220             | AUTO_3                | training set | Active                                     | <i>Daphnia magna</i>                   |
| Gold                                                                                      | [Au].[Au]     | R18891663          | M2660068             | AUTO_7                | training set | Active                                     | <i>Zebrafish embryo</i>                |
| Silver                                                                                    | [Ag].[Ag]     | R9877326           | M2645220             | AUTO_2                | training set | Active                                     | <i>Daphnia magna</i>                   |
| Silver, colloid                                                                           | [Ag].[Ag]     | R9728762           | M2645220             | AUTO_2                | training set | Active                                     | <i>Daphnia magna neonates</i>          |
| Silver                                                                                    | [Ag].[Ag]     | R21027880          | M2645220             | AUTO_253              | training set | Active                                     | <i>Pseudokirchneriella subcapitata</i> |
| Gold                                                                                      | [Au].[Au]     | R18891691          | M2660068             | AUTO_64               | training set | Active                                     | <i>Zebrafish embryo</i>                |
| Copper(II) oxide                                                                          | O=[Cu].O=[Cu] | R21027666          | M2652894             | AUTO_28               | training set | Active                                     | <i>Daphnia magna</i>                   |
| Silver                                                                                    | [Ag].[Ag]     | R21027737          | M2645220             | AUTO_101              | training set | Active                                     | <i>Pseudokirchneriella subcapitata</i> |
| Silver                                                                                    | [Ag].[Ag]     | R21027881          | M2645220             | AUTO_254              | training set | Active                                     | <i>Pseudokirchneriella subcapitata</i> |
| Silver                                                                                    | [Ag].[Ag]     | R21027884          | M2645220             | AUTO_257              | training set | Active                                     | <i>Pseudokirchneriella subcapitata</i> |
| Silver                                                                                    | [Ag].[Ag]     | R21027756          | M2645220             | AUTO_123              | training set | Active                                     | <i>Daphnia magna</i>                   |
| Gold                                                                                      | [Au].[Au]     | R18891659          | M2660068             | AUTO_2                | training set | Active                                     | <i>Zebrafish embryo</i>                |
| Silver                                                                                    | [Ag].[Ag]     | R21027705          | M2645220             | AUTO_69               | training set | Active                                     | <i>Daphnia pulex</i>                   |
| Silver                                                                                    | [Ag].[Ag]     | R21027656          | M2645220             | AUTO_18               | training set | Active                                     | <i>Daphnia magna</i>                   |
| Gold                                                                                      | [Au].[Au]     | R18891690          | M2660068             | AUTO_63               | training set | Active                                     | <i>Zebrafish embryo</i>                |
| Silver                                                                                    | [Ag].[Ag]     | R21027658          | M2645220             | AUTO_20               | training set | Active                                     | <i>Daphnia magna</i>                   |
| Silver                                                                                    | [Ag].[Ag]     | R21027659          | M2645220             | AUTO_21               | training set | Active                                     | <i>Daphnia magna</i>                   |
| Silver                                                                                    | [Ag].[Ag]     | R9979587           | M2645220             | AUTO_2                | training set | Active                                     | <i>Daphnia magna</i>                   |
| Gold                                                                                      | [Au].[Au]     | R18891662          | M2660068             | AUTO_6                | training set | Active                                     | <i>Zebrafish embryo</i>                |
| Silver                                                                                    | [Ag].[Ag]     | R21027660          | M2645220             | AUTO_22               | training set | Active                                     | <i>Daphnia magna</i>                   |
| Gold                                                                                      | [Au].[Au]     | R18891689          | M2660068             | AUTO_62               | training set | Active                                     | <i>Zebrafish</i>                       |

|                  |               |           |          |          |              |        |                                         |
|------------------|---------------|-----------|----------|----------|--------------|--------|-----------------------------------------|
|                  |               |           |          |          |              |        | <i>embryo</i>                           |
| Silver           | [Ag].[Ag]     | R21027806 | M2645220 | AUTO_173 | training set | Active | <i>Lemna minor</i>                      |
| Silver           | [Ag].[Ag]     | R21027883 | M2645220 | AUTO_256 | training set | Active | <i>Pseudokirc hneriella subcapitata</i> |
| Silver           | [Ag].[Ag]     | R21027689 | M2645220 | AUTO_51  | training set | Active | <i>Daphnia magna</i>                    |
| Silver           | [Ag].[Ag]     | R21027740 | M2645220 | AUTO_104 | training set | Active | <i>Pseudokirc hneriella subcapitata</i> |
| Silver           | [Ag].[Ag]     | R21027940 | M2645220 | AUTO_314 | training set | Active | <i>Daphnia magna</i>                    |
| Silver           | [Ag].[Ag]     | R18891681 | M2645220 | AUTO_42  | training set | Active | <i>Zebrafish embryo</i>                 |
| Silver           | [Ag].[Ag]     | R9979586  | M2645220 | AUTO_1   | training set | Active | <i>Pseudokirc hneriella subcapitata</i> |
| Silver           | [Ag].[Ag]     | R21027680 | M2645220 | AUTO_42  | training set | Active | <i>Desmodesm us subspicatus</i>         |
| Silver           | [Ag].[Ag]     | R21027882 | M2645220 | AUTO_255 | training set | Active | <i>Pseudokirc hneriella subcapitata</i> |
| Silver           | [Ag].[Ag]     | R21027807 | M2645220 | AUTO_174 | training set | Active | <i>Lemna minor</i>                      |
| Zinc oxide       | O=[Zn].O=[Zn] | R9727613  | M2652893 | AUTO_1   | training set | Active | <i>Pseudokirc hneriella subcapitata</i> |
| Silver           | [Ag].[Ag]     | R21027939 | M2645220 | AUTO_313 | training set | Active | <i>Daphnia magna</i>                    |
| Silver           | [Ag].[Ag]     | R21027811 | M2645220 | AUTO_178 | training set | Active | <i>Lemna minor</i>                      |
| Zinc oxide       | O=[Zn].O=[Zn] | R21027914 | M2652893 | AUTO_288 | training set | Active | <i>Pseudokirc hneriella subcapitata</i> |
| Silver           | [Ag].[Ag]     | R9727601  | M2645220 | AUTO_3   | training set | Active | <i>Daphnia magna, freshwater</i>        |
| Copper(II) oxide | O=[Cu].O=[Cu] | R12714722 | M2652894 | AUTO_10  | training set | Active | <i>Daphnia magna</i>                    |
| Copper(II) oxide | O=[Cu].O=[Cu] | R21027675 | M2652894 | AUTO_37  | training set | Active | <i>Daphnia magna</i>                    |
| Silver           | [Ag].[Ag]     | R9727600  | M2645220 | AUTO_2   | training set | Active | <i>Daphnia magna, river water</i>       |
| Zinc oxide       | O=[Zn].O=[Zn] | R21027706 | M2652893 | AUTO_70  | training set | Active | <i>Pseudokirc hneriella subcapitata</i> |
| Silver           | [Ag].[Ag]     | R21027812 | M2645220 | AUTO_179 | training set | Active | <i>Lemna minor</i>                      |
| Silver           | [Ag].[Ag]     | R21027808 | M2645220 | AUTO_175 | training set | Active | <i>Lemna minor</i>                      |
| Silver           | [Ag].[Ag]     | R21027925 | M2645220 | AUTO_299 | training set | Active | <i>Chlamydom onas reinhardtii</i>       |
| Silver           | [Ag].[Ag]     | R21027926 | M2645220 | AUTO_300 | training set | Active | <i>Chlamydom onas reinhardtii</i>       |

|                                      |                             |           |           |          |              |        |                                   |
|--------------------------------------|-----------------------------|-----------|-----------|----------|--------------|--------|-----------------------------------|
| Gold                                 | [Au].[Au]                   | R18891677 | M2660068  | AUTO_28  | training set | Active | <i>Zebrafish embryo</i>           |
| Copper(II) oxide                     | O=[Cu].O=[Cu]               | R12714718 | M2652894  | AUTO_6   | training set | Active | <i>Daphnia magna</i>              |
| Silver                               | [Ag].[Ag]                   | R21027927 | M2645220  | AUTO_301 | training set | Active | <i>Chlamydomonas reinhardtii</i>  |
| Silver                               | [Ag].[Ag]                   | R21027758 | M2645220  | AUTO_125 | training set | Active | <i>Caenorhabditis elegans</i>     |
| Copper(II) oxide                     | O=[Cu].O=[Cu]               | R12714716 | M2652894  | AUTO_4   | training set | Active | <i>Daphnia magna</i>              |
| Copper(II) oxide                     | O=[Cu].O=[Cu]               | R21027677 | M2652894  | AUTO_39  | training set | Active | <i>Daphnia magna</i>              |
| Silver                               | [Ag].[Ag]                   | R21027928 | M2645220  | AUTO_302 | training set | Active | <i>Chlamydomonas reinhardtii</i>  |
| Copper(II) oxide                     | O=[Cu].O=[Cu]               | R12714717 | M2652894  | AUTO_5   | training set | Active | <i>Daphnia magna</i>              |
| Copper(II) oxide                     | O=[Cu].O=[Cu]               | R21027668 | M2652894  | AUTO_30  | training set | Active | <i>Daphnia magna</i>              |
| Silver                               | [Ag].[Ag]                   | R21027687 | M2645220  | AUTO_49  | training set | Active | <i>Daphnia magna</i>              |
| Silver                               | [Ag].[Ag]                   | R21027813 | M2645220  | AUTO_180 | training set | Active | <i>Lemna minor</i>                |
| Silver                               | [Ag].[Ag]                   | R21027809 | M2645220  | AUTO_176 | training set | Active | <i>Lemna minor</i>                |
| Zinc oxide                           | O=[Zn].O=[Zn]               | R21027876 | M2652893  | AUTO_249 | training set | Active | <i>Daphnia magna</i>              |
| Zinc oxide                           | O=[Zn].O=[Zn]               | R21027947 | M2652893  | AUTO_321 | training set | Active | <i>Daphnia magna</i>              |
| Silver                               | [Ag].[Ag]                   | R9727602  | M2645220  | AUTO_4   | training set | Active | <i>Daphnia magna, river water</i> |
| Silver                               | [Ag].[Ag]                   | R2659286  | M2645220  | AUTO_6   | training set | Active | <i>Chlamydomonas reinhardtii</i>  |
| Silver, suspension                   | [Ag].[Ag]                   | R9728763  | M2645220  | AUTO_3   | training set | Active | <i>Daphnia magna neonates</i>     |
| Silver                               | [Ag].[Ag]                   | R2659284  | M2645220  | AUTO_4   | training set | Active | <i>Chlamydomonas reinhardtii</i>  |
| Silver                               | [Ag].[Ag]                   | R2659283  | M2645220  | AUTO_3   | training set | Active | <i>Chlamydomonas reinhardtii</i>  |
| Mixture: Copper(II) oxide/Zinc oxide | O=[Cu].O=[Cu].O=[Zn].O=[Zn] | R9866146  | M3728107  | AUTO_3   | training set | Active | <i>Daphnia magna</i>              |
| cerium oxide                         | O=[Ce]=O. O=[Ce]=O          | R21027800 | M2659378  | AUTO_167 | training set | Active | <i>Anabaena sp.</i>               |
| Erbium oxide                         | O=[Er]O[Er]=O.O=[Er]O[Er]=O | R18891676 | M84250880 | AUTO_27  | training set | Active | <i>Zebrafish embryo</i>           |
| Silver                               | [Ag].[Ag]                   | R21027766 | M2645220  | AUTO_133 | training set | Active | <i>Caenorhabditis elegans</i>     |
| Copper(II)                           | O=[Cu].O=                   | R12714720 | M2652894  | AUTO_8   | training set | Active | <i>Daphnia</i>                    |

|                                  |                       |           |          |          |              |        |                                        |
|----------------------------------|-----------------------|-----------|----------|----------|--------------|--------|----------------------------------------|
| oxide                            | [Cu]                  |           |          |          |              |        | <i>magna</i>                           |
| Copper(II) oxide                 | O=[Cu].O=[Cu]         | R21027673 | M2652894 | AUTO_35  | training set | Active | <i>Daphnia magna</i>                   |
| Zinc oxide                       | O=[Zn].O=[Zn]         | R21027948 | M2652893 | AUTO_322 | training set | Active | <i>Daphnia magna</i>                   |
| Nickel                           | [Ni].[Ni]             | R21027744 | M2655007 | AUTO_108 | training set | Active | <i>Pseudokirchneriella subcapitata</i> |
| Gold                             | [Au].[Au]             | R18891666 | M2660068 | AUTO_12  | training set | Active | <i>Zebrafish embryo</i>                |
| Silver                           | [Ag].[Ag]             | R21027929 | M2645220 | AUTO_303 | training set | Active | <i>Chlamydomonas reinhardtii</i>       |
| Silver                           | [Ag].[Ag]             | R21027768 | M2645220 | AUTO_135 | training set | Active | <i>Caenorhabditis elegans</i>          |
| Silver                           | [Ag].[Ag]             | R21027718 | M2645220 | AUTO_82  | training set | Active | <i>Escherichia coli</i>                |
| Copper(II) oxide                 | O=[Cu].O=[Cu]         | R9866144  | M2652894 | AUTO_1   | training set | Active | <i>Daphnia magna</i>                   |
| Titanium dioxide                 | O=[Ti]=O.<br>O=[Ti]=O | R21027892 | M2645228 | AUTO_265 | training set | Active | <i>Daphnia magna</i>                   |
| Zinc oxide                       | O=[Zn].O=[Zn]         | R9889048  | M2652893 | AUTO_5   | training set | Active | <i>Daphnia magna</i>                   |
| Silver                           | [Ag].[Ag]             | R21027661 | M2645220 | AUTO_23  | training set | Active | <i>Daphnia magna</i>                   |
| Copper                           | [Cu].[Cu]             | R21027743 | M2655006 | AUTO_107 | training set | Active | <i>Pseudokirchneriella subcapitata</i> |
| cerium oxide                     | O=[Ce]=O.<br>O=[Ce]=O | R21027797 | M2659378 | AUTO_164 | training set | Active | <i>Anabaena sp.</i>                    |
| Zinc oxide                       | O=[Zn].O=[Zn]         | R12602002 | M2652893 | mg/l     | training set | Active | <i>Daphnia magna</i>                   |
| Silver                           | [Ag].[Ag]             | R21027690 | M2645220 | AUTO_52  | training set | Active | <i>Daphnia magna</i>                   |
| Silver                           | [Ag].[Ag]             | R21027719 | M2645220 | AUTO_83  | training set | Active | <i>Escherichia coli</i>                |
| Gold                             | [Au].[Au]             | R18891664 | M2660068 | AUTO_8   | training set | Active | <i>Zebrafish embryo</i>                |
| Copper(II) oxide                 | O=[Cu].O=[Cu]         | R9727617  | M2652894 | AUTO_5   | training set | Active | <i>Pseudokirchneriella subcapitata</i> |
| Titanium dioxide                 | O=[Ti]=O.<br>O=[Ti]=O | R21027699 | M2645228 | AUTO_63  | training set | Active | <i>Daphnia magna</i>                   |
| Zinc oxide                       | O=[Zn].O=[Zn]         | R9866145  | M2652893 | AUTO_2   | training set | Active | <i>Daphnia magna</i>                   |
| Silver                           | [Ag].[Ag]             | R21027695 | M2645220 | AUTO_59  | training set | Active | <i>Danio rerio</i>                     |
| Titanium dioxide ((Degussa P25)) | O=[Ti]=O.<br>O=[Ti]=O | R9729291  | M2645228 | AUTO_2   | training set | Active | <i>Daphnia magna, UVA photoperiod</i>  |
| Silver                           | [Ag].[Ag]             | R21027759 | M2645220 | AUTO_126 | training set | Active | <i>Caenorhabditis elegans</i>          |
| cerium oxide                     | O=[Ce]=O.<br>O=[Ce]=O | R21027788 | M2659378 | AUTO_155 | training set | Active | <i>Pseudokirchneriella subcapitata</i> |

|                  |                       |           |          |          |              |        |                                        |
|------------------|-----------------------|-----------|----------|----------|--------------|--------|----------------------------------------|
| Copper(II) oxide | O=[Cu].O=[Cu]         | R21027912 | M2652894 | AUTO_286 | training set | Active | <i>Pseudokirchneriella subcapitata</i> |
| Silver           | [Ag].[Ag]             | R21027692 | M2645220 | AUTO_56  | training set | Active | <i>Raphidocelis subcapitata</i>        |
| Zinc oxide       | O=[Zn].O=[Zn]         | R9728758  | M2652893 | AUTO_2   | training set | Active | <i>Daphnia magna</i>                   |
| Titanium dioxide | O=[Ti]=O.<br>O=[Ti]=O | R21027640 | M2645228 | AUTO_1   | training set | Active | <i>Pseudokirchneriella subcapitata</i> |
| Silver           | [Ag].[Ag]             | R9963618  | M2645220 | AUTO_2   | training set | Active | <i>Danio rerio embryos</i>             |
| Silver           | [Ag].[Ag]             | R21027886 | M2645220 | AUTO_259 | training set | Active | <i>Danio rerio</i>                     |
| Silver           | [Ag].[Ag]             | R9963617  | M2645220 | AUTO_1   | training set | Active | <i>Danio rerio embryos</i>             |
| Silver           | [Ag].[Ag]             | R21027887 | M2645220 | AUTO_260 | training set | Active | <i>Danio rerio</i>                     |
| Silver           | [Ag].[Ag]             | R21027662 | M2645220 | AUTO_24  | training set | Active | <i>Daphnia magna</i>                   |
| Silver           | [Ag].[Ag]             | R21027889 | M2645220 | AUTO_262 | training set | Active | <i>Danio rerio</i>                     |
| Silver           | [Ag].[Ag]             | R21027697 | M2645220 | AUTO_61  | training set | Active | <i>Danio rerio</i>                     |
| Copper(II) oxide | O=[Cu].O=[Cu]         | R21027667 | M2652894 | AUTO_29  | training set | Active | <i>Daphnia magna</i>                   |
| Silver           | [Ag].[Ag]             | R21027763 | M2645220 | AUTO_130 | training set | Active | <i>Caenorhabditis elegans</i>          |
| Silver           | [Ag].[Ag]             | R21027663 | M2645220 | AUTO_25  | training set | Active | <i>Daphnia magna</i>                   |
| Silver           | [Ag].[Ag]             | R21027767 | M2645220 | AUTO_134 | training set | Active | <i>Caenorhabditis elegans</i>          |
| Zinc oxide       | O=[Zn].O=[Zn]         | R21027945 | M2652893 | AUTO_319 | training set | Active | <i>Daphnia magna</i>                   |
| Silver           | [Ag].[Ag]             | R21027739 | M2645220 | AUTO_103 | training set | Active | <i>Pseudokirchneriella subcapitata</i> |
| Silver           | [Ag].[Ag]             | R21027696 | M2645220 | AUTO_60  | training set | Active | <i>Danio rerio</i>                     |
| Zinc oxide       | O=[Zn].O=[Zn]         | R21027946 | M2652893 | AUTO_320 | training set | Active | <i>Daphnia magna</i>                   |
| Titanium dioxide | O=[Ti]=O.<br>O=[Ti]=O | R21027709 | M2645228 | AUTO_73  | training set | Active | <i>Scenedesmus obliquus</i>            |
| Zinc oxide       | O=[Zn].O=[Zn]         | R2707670  | M2652893 | AUTO_11  | training set | Active | <i>Vibrio fischeri</i>                 |
| Silver           | [Ag].[Ag]             | R21027769 | M2645220 | AUTO_136 | training set | Active | <i>Caenorhabditis elegans</i>          |
| Copper(II) oxide | O=[Cu].O=[Cu]         | R21027669 | M2652894 | AUTO_31  | training set | Active | <i>Daphnia magna</i>                   |
| Zinc oxide       | O=[Zn].O=[Zn]         | R2707671  | M2652893 | AUTO_12  | training set | Active | <i>Vibrio fischeri</i>                 |
| Zinc oxide       | O=[Zn].O=[Zn]         | R9968654  | M2652893 | AUTO_3   | training set | Active | <i>Vibrio fischeri</i>                 |
| Zinc oxide       | O=[Zn].O=[Zn]         | R21027921 | M2652893 | AUTO_295 | training set | Active | <i>Vibrio fischeri</i>                 |
| Titanium dioxide | O=[Ti]=O.<br>O=[Ti]=O | R21027641 | M2645228 | AUTO_2   | training set | Active | <i>Pseudokirchneriella subcapitata</i> |



|                                  |                             |           |          |          |              |        |                                                  |
|----------------------------------|-----------------------------|-----------|----------|----------|--------------|--------|--------------------------------------------------|
| Silver                           | [Ag].[Ag]                   | R21027715 | M2645220 | AUTO_79  | training set | Active | <i>Escherichia coli</i>                          |
| Zinc oxide                       | O=[Zn].O=[Zn]               | R9968655  | M2652893 | AUTO_4   | training set | Active | <i>Danio rerio</i>                               |
| Zinc oxide                       | O=[Zn].O=[Zn]               | R21027708 | M2652893 | AUTO_72  | training set | Active | <i>Danio rerio</i>                               |
| Copper(II) oxide                 | O=[Cu].O=[Cu]               | R21027670 | M2652894 | AUTO_32  | training set | Active | <i>Daphnia magna</i>                             |
| dysprosium oxide                 | O=[Dy]O[Dy]=O.O=[Dy]O[Dy]=O | R18891672 | M3728214 | AUTO_22  | training set | Active | <i>Zebrafish embryo</i>                          |
| Silver                           | [Ag].[Ag]                   | R21027679 | M2645220 | AUTO_41  | training set | Active | <i>Desmodemus subspicatus</i>                    |
| Silver                           | [Ag].[Ag]                   | R21027878 | M2645220 | AUTO_251 | training set | Active | <i>Phaeodactylum tricornutum</i>                 |
| Zinc oxide                       | O=[Zn].O=[Zn]               | R21027890 | M2652893 | AUTO_263 | training set | Active | <i>Dunaliella tertiolecta</i>                    |
| Titanium dioxide                 | O=[Ti]=O.O=[Ti]=O           | R21027642 | M2645228 | AUTO_3   | training set | Active | <i>Ceriodaphnia dubia</i>                        |
| Titanium dioxide                 | O=[Ti]=O.O=[Ti]=O           | R21027745 | M2645228 | AUTO_109 | training set | Active | <i>Pseudokirchneriella subcapitata</i>           |
| Copper(II) oxide                 | O=[Cu].O=[Cu]               | R21027830 | M2652894 | AUTO_198 | training set | Active | <i>Escherichia coli</i>                          |
| Copper(II) oxide                 | O=[Cu].O=[Cu]               | R21027671 | M2652894 | AUTO_33  | training set | Active | <i>Daphnia magna</i>                             |
| Copper(II) oxide                 | O=[Cu].O=[Cu]               | R9890170  | M2652894 | AUTO_1   | training set | Active | <i>Daphnia magna</i>                             |
| Zinc oxide                       | O=[Zn].O=[Zn]               | R9890174  | M2652893 | AUTO_5   | training set | Active | <i>Daphnia magna</i>                             |
| Zinc oxide                       | O=[Zn].O=[Zn]               | R12602003 | M2652893 | mg/l     | training set | Active | <i>Daphnia magna</i>                             |
| Copper(II) oxide                 | O=[Cu].O=[Cu]               | R21027672 | M2652894 | AUTO_34  | training set | Active | <i>Daphnia magna</i>                             |
| Titanium dioxide ((Degussa P25)) | O=[Ti]=O.O=[Ti]=O           | R9729293  | M2645228 | AUTO_4   | training set | Active | <i>Daphnia magna</i> ,<br><i>UVA photoperiod</i> |
| Silver                           | [Ag].[Ag]                   | R21027781 | M2645220 | AUTO_148 | training set | Active | <i>Caenorhabditis elegans</i>                    |
| Silver                           | [Ag].[Ag]                   | R21027651 | M2645220 | AUTO_12  | training set | Active | <i>Caenorhabditis elegans</i>                    |
| Titanium dioxide                 | O=[Ti]=O.O=[Ti]=O           | R21027746 | M2645228 | AUTO_110 | training set | Active | <i>Pseudokirchneriella subcapitata</i>           |
| Silver                           | [Ag].[Ag]                   | R21027819 | M2645220 | AUTO_186 | training set | Active | <i>Escherichia coli</i>                          |
| Titanium dioxide                 | O=[Ti]=O.O=[Ti]=O           | R12572776 | M2645228 | AUTO_2   | training set | Active | <i>Daphnia magna</i>                             |
| Copper(II) oxide                 | O=[Cu].O=[Cu]               | R12714719 | M2652894 | AUTO_7   | training set | Active | <i>Daphnia magna</i>                             |
| Copper(II) oxide                 | O=[Cu].O=[Cu]               | R21027831 | M2652894 | AUTO_199 | training set | Active | <i>Escherichia coli</i>                          |

|                  |                       |           |          |          |              |        |                                        |
|------------------|-----------------------|-----------|----------|----------|--------------|--------|----------------------------------------|
| Copper(II) oxide | O=[Cu].O=[Cu]         | R21027901 | M2652894 | AUTO_275 | training set | Active | <i>Saccharomyces cerevisiae</i>        |
| Silver           | [Ag].[Ag]             | R21027760 | M2645220 | AUTO_127 | training set | Active | <i>Caenorhabditis elegans</i>          |
| Titanium dioxide | O=[Ti]=O.<br>O=[Ti]=O | R12572777 | M2645228 | AUTO_311 | training set | Active | <i>Daphnia magna</i>                   |
| Silver           | [Ag].[Ag]             | R21027879 | M2645220 | AUTO_252 | training set | Active | <i>Phaeodactylum tricornerutum</i>     |
| Silver           | [Ag].[Ag]             | R21027682 | M2645220 | AUTO_44  | training set | Active | <i>Desmodesmus subspicatus</i>         |
| Titanium dioxide | O=[Ti]=O.<br>O=[Ti]=O | R21027934 | M2645228 | AUTO_308 | training set | Active | <i>Daphnia magna</i>                   |
| Silver           | [Ag].[Ag]             | R21027820 | M2645220 | AUTO_187 | training set | Active | <i>Escherichia coli</i>                |
| Titanium dioxide | O=[Ti]=O.<br>O=[Ti]=O | R21027700 | M2645228 | AUTO_64  | training set | Active | <i>Daphnia magna</i>                   |
| Zinc oxide       | O=[Zn].O=[Zn]         | R21027754 | M2652893 | AUTO_121 | training set | Active | <i>Vibrio fischeri</i>                 |
| Silver           | [Ag].[Ag]             | R21027665 | M2645220 | AUTO_27  | training set | Active | <i>Daphnia magna</i>                   |
| Zinc oxide       | O=[Zn].O=[Zn]         | R10003996 | M2652893 | AUTO_2   | training set | Active | <i>Tetrahymena thermophila</i>         |
| Copper(II) oxide | O=[Cu].O=[Cu]         | R9848050  | M2652894 | AUTO_1   | training set | Active | <i>Daphnia magna</i>                   |
| Copper(II) oxide | O=[Cu].O=[Cu]         | R21027922 | M2652894 | AUTO_296 | training set | Active | <i>Daphnia magna</i>                   |
| Silver           | [Ag].[Ag]             | R21027694 | M2645220 | AUTO_58  | training set | Active | <i>Raphidocelis subcapitata</i>        |
| Copper(II) oxide | O=[Cu].O=[Cu]         | R21027902 | M2652894 | AUTO_276 | training set | Active | <i>Saccharomyces cerevisiae</i>        |
| Zinc oxide       | O=[Zn].O=[Zn]         | R10003995 | M2652893 | AUTO_1   | training set | Active | <i>Tetrahymena thermophila</i>         |
| Silver           | [Ag].[Ag]             | R21027764 | M2645220 | AUTO_131 | training set | Active | <i>Caenorhabditis elegans</i>          |
| Copper(II) oxide | O=[Cu].O=[Cu]         | R21027903 | M2652894 | AUTO_277 | training set | Active | <i>Saccharomyces cerevisiae</i>        |
| cerium oxide     | O=[Ce]=O.<br>O=[Ce]=O | R21027790 | M2659378 | AUTO_157 | training set | Active | <i>Pseudokirchneriella subcapitata</i> |
| Zinc oxide       | O=[Zn].O=[Zn]         | R21027755 | M2652893 | AUTO_122 | training set | Active | <i>Vibrio fischeri</i>                 |
| Copper(II) oxide | O=[Cu].O=[Cu]         | R21027904 | M2652894 | AUTO_278 | training set | Active | <i>Saccharomyces cerevisiae</i>        |
| Titanium dioxide | O=[Ti]=O.<br>O=[Ti]=O | R21027647 | M2645228 | AUTO_8   | training set | Active | <i>Bacillus licheniformis</i>          |

|                  |                       |           |          |          |              |        |                                        |
|------------------|-----------------------|-----------|----------|----------|--------------|--------|----------------------------------------|
| cerium oxide     | O=[Ce]=O.<br>O=[Ce]=O | R21027786 | M2659378 | AUTO_153 | training set | Active | <i>Pseudokirchneriella subcapitata</i> |
| Copper(II) oxide | O=[Cu].O=<br>[Cu]     | R21027905 | M2652894 | AUTO_279 | training set | Active | <i>Saccharomyces cerevisiae</i>        |
| Zinc oxide       | O=[Zn].O=<br>[Zn]     | R21027944 | M2652893 | AUTO_318 | training set | Active | <i>Tetrahymena thermophila</i>         |
| Titanium dioxide | O=[Ti]=O.<br>O=[Ti]=O | R12572781 | M2645228 | AUTO_8   | training set | Active | <i>Brachionus plicatilis</i>           |
| Copper(II) oxide | O=[Cu].O=<br>[Cu]     | R21027906 | M2652894 | AUTO_280 | training set | Active | <i>Saccharomyces cerevisiae</i>        |
| cerium oxide     | O=[Ce]=O.<br>O=[Ce]=O | R21027725 | M2659378 | AUTO_89  | training set | Active | <i>Pseudokirchneriella subcapitata</i> |
| Silver           | [Ag].[Ag]             | R21027825 | M2645220 | AUTO_193 | training set | Active | <i>Escherichia coli</i>                |
| Titanium dioxide | O=[Ti]=O.<br>O=[Ti]=O | R9727615  | M2645228 | AUTO_3   | training set | Active | <i>Pseudokirchneriella subcapitata</i> |
| Silver           | [Ag].[Ag]             | R9889342  | M2645220 | AUTO_3   | training set | Active | <i>Danio rerio embryos</i>             |
| Zinc oxide       | O=[Zn].O=<br>[Zn]     | R21027942 | M2652893 | AUTO_316 | training set | Active | <i>Tetrahymena thermophila</i>         |
| cerium oxide     | O=[Ce]=O.<br>O=[Ce]=O | R21027794 | M2659378 | AUTO_161 | training set | Active | <i>Anabaena sp.</i>                    |
| Titanium dioxide | O=[Ti]=O.<br>O=[Ti]=O | R21027710 | M2645228 | AUTO_74  | training set | Active | <i>Scenedesmus obliquus</i>            |
| Copper(II) oxide | O=[Cu].O=<br>[Cu]     | R21027836 | M2652894 | AUTO_204 | training set | Active | <i>Escherichia coli</i>                |
| Zinc oxide       | O=[Zn].O=<br>[Zn]     | R21027846 | M2652893 | AUTO_214 | training set | Active | <i>Escherichia coli</i>                |
| Copper(II) oxide | O=[Cu].O=<br>[Cu]     | R21027907 | M2652894 | AUTO_281 | training set | Active | <i>Saccharomyces cerevisiae</i>        |
| Zinc oxide       | O=[Zn].O=<br>[Zn]     | R9890176  | M2652893 | AUTO_7   | training set | Active | <i>Daphnia magna</i>                   |
| Zinc oxide       | O=[Zn].O=<br>[Zn]     | R10004000 | M2652893 | AUTO_6   | training set | Active | <i>Tetrahymena thermophila</i>         |
| Zinc oxide       | O=[Zn].O=<br>[Zn]     | R9728759  | M2652893 | AUTO_3   | training set | Active | <i>Daphnia magna</i>                   |
| cerium oxide     | O=[Ce]=O.<br>O=[Ce]=O | R21027803 | M2659378 | AUTO_170 | training set | Active | <i>Anabaena sp.</i>                    |
| Titanium dioxide | O=[Ti]=O.<br>O=[Ti]=O | R9727607  | M2645228 | AUTO_1   | training set | Active | <i>Daphnia similis</i>                 |
| Copper(II) oxide | O=[Cu].O=<br>[Cu]     | R21027908 | M2652894 | AUTO_282 | training set | Active | <i>Saccharomyces cerevisiae</i>        |
| Aluminium        | [Al].[Al]             | R21027742 | M3728130 | AUTO_106 | training set | Active | <i>Pseudokirchneriella subcapitata</i> |
| cerium           | O=[Ce]=O.             | R21027791 | M2659378 | AUTO_158 | training set | Active | <i>Pseudokirchneriella subcapitata</i> |

|                  |                       |           |          |          |              |          |                                         |
|------------------|-----------------------|-----------|----------|----------|--------------|----------|-----------------------------------------|
| oxide            | O=[Ce]=O              |           |          |          |              |          | <i>hneriella subcapitata</i>            |
| cerium oxide     | O=[Ce]=O.<br>O=[Ce]=O | R21027792 | M2659378 | AUTO_159 | training set | Active   | <i>Pseudokirc hneriella subcapitata</i> |
| Zinc oxide       | O=[Zn].O=[Zn]         | R9890178  | M2652893 | AUTO_9   | training set | Active   | <i>Tetrahymena thermophila</i>          |
| Titanium dioxide | O=[Ti]=O.<br>O=[Ti]=O | R21027936 | M2645228 | AUTO_310 | training set | Active   | <i>Daphnia magna</i>                    |
| cerium oxide     | O=[Ce]=O.<br>O=[Ce]=O | R21027787 | M2659378 | AUTO_154 | training set | Active   | <i>Pseudokirc hneriella subcapitata</i> |
| Titanium dioxide | O=[Ti]=O.<br>O=[Ti]=O | R21027913 | M2645228 | AUTO_287 | training set | Active   | <i>Pseudokirc hneriella subcapitata</i> |
| Copper(II) oxide | O=[Cu].O=[Cu]         | R21027909 | M2652894 | AUTO_283 | training set | Active   | <i>Saccharomyces cerevisiae</i>         |
| Titanium dioxide | O=[Ti]=O.<br>O=[Ti]=O | R21027938 | M2645228 | AUTO_312 | training set | Active   | <i>Daphnia magna</i>                    |
| Zinc oxide       | O=[Zn].O=[Zn]         | R9890177  | M2652893 | AUTO_8   | training set | Inactive | <i>Daphnia magna</i>                    |
| Zinc oxide       | O=[Zn].O=[Zn]         | R12584192 | M2652893 | AUTO_1   | training set | Inactive | <i>Folsomia candida</i>                 |
| Copper(II) oxide | O=[Cu].O=[Cu]         | R21027827 | M2652894 | AUTO_195 | training set | Inactive | <i>Escherichia coli</i>                 |
| Zinc oxide       | O=[Zn].O=[Zn]         | R9968656  | M2652893 | AUTO_5   | training set | Inactive | <i>Xenopus laevis</i>                   |
| Zinc oxide       | O=[Zn].O=[Zn]         | R21027653 | M2652893 | AUTO_14  | training set | Inactive | <i>Xenopus laevis</i>                   |
| Titanium dioxide | O=[Ti]=O.<br>O=[Ti]=O | R12572782 | M2645228 | AUTO_9   | training set | Inactive | <i>Brachionus plicatilis</i>            |
| Titanium dioxide | O=[Ti]=O.<br>O=[Ti]=O | R12572778 | M2645228 | AUTO_5   | training set | Inactive | <i>Phaeodactylum tricorutum</i>         |
| Copper(II) oxide | O=[Cu].O=[Cu]         | R21027828 | M2652894 | AUTO_196 | training set | Inactive | <i>Escherichia coli</i>                 |
| Copper(II) oxide | O=[Cu].O=[Cu]         | R9727618  | M2652894 | AUTO_6   | training set | Inactive | <i>Pseudokirc hneriella subcapitata</i> |
| Silver           | [Ag].[Ag]             | R21027770 | M2645220 | AUTO_137 | training set | Inactive | <i>Caenorhabditis elegans</i>           |
| cerium oxide     | O=[Ce]=O.<br>O=[Ce]=O | R9727307  | M2659378 | AUTO_114 | training set | Inactive | <i>Pseudokirc hneriella subcapitata</i> |
| Titanium dioxide | O=[Ti]=O.<br>O=[Ti]=O | R9727608  | M2645228 | AUTO_2   | training set | Inactive | <i>Daphnia similis</i>                  |
| cerium oxide     | O=[Ce]=O.<br>O=[Ce]=O | R21027783 | M2659378 | AUTO_150 | training set | Inactive | <i>Pseudokirc hneriella subcapitata</i> |
| Copper(II) oxide | O=[Cu].O=[Cu]         | R9997798  | M2652894 | AUTO_7   | training set | Inactive | <i>Saccharomyces cerevisiae</i>         |
| Silver           | [Ag].[Ag]             | R21027780 | M2645220 | AUTO_147 | training set | Inactive | <i>Caenorhabditis elegans</i>           |

|                                  |                       |           |          |          |              |          |                                        |
|----------------------------------|-----------------------|-----------|----------|----------|--------------|----------|----------------------------------------|
| Titanium dioxide                 | O=[Ti]=O.<br>O=[Ti]=O | R12572780 | M2645228 | AUTO_7   | training set | Inactive | <i>Phaeodactylum tricornutum</i>       |
| Zinc oxide                       | O=[Zn].O=<br>[Zn]     | R9890181  | M2652893 | AUTO_12  | training set | Inactive | <i>Tetrahymena thermophila</i>         |
| Copper(II) oxide                 | O=[Cu].O=<br>[Cu]     | R21027829 | M2652894 | AUTO_197 | training set | Inactive | <i>Escherichia coli</i>                |
| Titanium dioxide                 | O=[Ti]=O.<br>O=[Ti]=O | R9887907  | M2645228 | AUTO_2   | training set | Inactive | <i>Pseudokirchneriella subcapitata</i> |
| cerium oxide                     | O=[Ce]=O.<br>O=[Ce]=O | R21027793 | M2659378 | AUTO_160 | training set | Inactive | <i>Pseudokirchneriella subcapitata</i> |
| Titanium dioxide                 | O=[Ti]=O.<br>O=[Ti]=O | R21027649 | M2645228 | AUTO_10  | training set | Inactive | <i>Bacillus licheniformis</i>          |
| Silver                           | [Ag].[Ag]             | R21027816 | M2645220 | AUTO_183 | training set | Inactive | <i>Escherichia coli</i>                |
| Zinc oxide                       | O=[Zn].O=<br>[Zn]     | R9890179  | M2652893 | AUTO_10  | training set | Inactive | <i>Tetrahymena thermophila</i>         |
| cerium oxide                     | O=[Ce]=O.<br>O=[Ce]=O | R9727308  | M2659378 | AUTO_115 | training set | Inactive | <i>Pseudokirchneriella subcapitata</i> |
| Silver                           | [Ag].[Ag]             | R9889341  | M2645220 | AUTO_2   | training set | Inactive | <i>Danio rerio embryos</i>             |
| Titanium dioxide ((Degussa P25)) | O=[Ti]=O.<br>O=[Ti]=O | R9729290  | M2645228 | AUTO_1   | training set | Inactive | <i>Daphnia magna, dark</i>             |
| Titanium dioxide                 | O=[Ti]=O.<br>O=[Ti]=O | R21027650 | M2645228 | AUTO_11  | training set | Inactive | <i>Bacillus licheniformis</i>          |
| cerium oxide                     | O=[Ce]=O.<br>O=[Ce]=O | R21027749 | M2659378 | AUTO_116 | training set | Inactive | <i>Daphnia magna</i>                   |
| Copper(II) oxide                 | O=[Cu].O=<br>[Cu]     | R9997794  | M2652894 | AUTO_3   | training set | Inactive | <i>Saccharomyces cerevisiae</i>        |
| Titanium dioxide                 | O=[Ti]=O.<br>O=[Ti]=O | R9887908  | M2645228 | AUTO_3   | training set | Inactive | <i>Pseudokirchneriella subcapitata</i> |
| Titanium dioxide                 | O=[Ti]=O.<br>O=[Ti]=O | R21027711 | M2645228 | AUTO_75  | training set | Inactive | <i>Pseudokirchneriella subcapitata</i> |
| Silver                           | [Ag].[Ag]             | R21027693 | M2645220 | AUTO_57  | training set | Inactive | <i>Raphidocelis subcapitata</i>        |
| Copper(II) oxide                 | O=[Cu].O=<br>[Cu]     | R21027917 | M2652894 | AUTO_291 | training set | Inactive | <i>Saccharomyces cerevisiae</i>        |
| Zinc oxide                       | O=[Zn].O=<br>[Zn]     | R21027843 | M2652893 | AUTO_211 | training set | Inactive | <i>Escherichia coli</i>                |
| cerium oxide                     | O=[Ce]=O.<br>O=[Ce]=O | R21027750 | M2659378 | AUTO_117 | training set | Inactive | <i>Daphnia magna</i>                   |
| Titanium dioxide                 | O=[Ti]=O.<br>O=[Ti]=O | R21027644 | M2645228 | AUTO_5   | training set | Inactive | <i>Ceriodaphnia dubia</i>              |

|                                  |                                       |           |               |          |              |          |                                        |
|----------------------------------|---------------------------------------|-----------|---------------|----------|--------------|----------|----------------------------------------|
| Titanium dioxide                 | O=[Ti]=O.<br>O=[Ti]=O                 | R21027652 | M2645228      | AUTO_13  | training set | Inactive | <i>Daphnia magna</i>                   |
| Zinc oxide                       | O=[Zn].O=<br>[Zn]                     | R9890180  | M2652893      | AUTO_11  | training set | Inactive | <i>Tetrahymena thermophila</i>         |
| Titanium dioxide                 | O=[Ti]=O.<br>O=[Ti]=O                 | R9728765  | M2645228      | AUTO_2   | training set | Inactive | <i>Ceriodaphnia dubia, dark</i>        |
| Titanium dioxide ((Degussa P25)) | O=[Ti]=O.<br>O=[Ti]=O                 | R9729292  | M2645228      | AUTO_3   | training set | Inactive | <i>Daphnia magna, dark</i>             |
| Copper(II) oxide                 | O=[Cu].O=<br>[Cu]                     | R9866153  | M2652894      | AUTO_1   | training set | Inactive | <i>Escherichia coli</i>                |
| Copper(II) oxide                 | O=[Cu].O=<br>[Cu]                     | R21027776 | M2652894      | AUTO_143 | training set | Inactive | <i>Escherichia coli</i>                |
| Silver                           | [Ag].[Ag]                             | R9889340  | M2645220      | AUTO_1   | training set | Inactive | <i>Danio rerio embryos</i>             |
| Silver                           | [Ag].[Ag]                             | R9848057  | M2645220      | AUTO_1   | training set | Inactive | <i>Chlorella sp.</i>                   |
| Silver                           | [Ag].[Ag]                             | R21027821 | M2645220      | AUTO_188 | training set | Inactive | <i>Escherichia coli</i>                |
| Zinc oxide                       | O=[Zn].O=<br>[Zn]                     | R21027730 | M2652893      | AUTO_94  | training set | Inactive | <i>Bacillus subtilis</i>               |
| Zinc oxide                       | O=[Zn].O=<br>[Zn]                     | R21027734 | M2652893      | AUTO_98  | training set | Inactive | <i>Escherichia coli</i>                |
| Titanium dioxide                 | O=[Ti]=O.<br>O=[Ti]=O                 | R21027720 | M2645228      | AUTO_84  | training set | Inactive | <i>Desmodesmus subspicatus</i>         |
| Nickel(II) oxide                 | O=[Ni].O=<br>[Ni]                     | R21027701 | M2652904      | AUTO_65  | training set | Inactive | <i>Chlorella vulgaris</i>              |
| Copper(II) oxide                 | O=[Cu].O=<br>[Cu]                     | R21027832 | M2652894      | AUTO_200 | training set | Inactive | <i>Escherichia coli</i>                |
| cerium oxide                     | O=[Ce]=O.<br>O=[Ce]=O                 | R21027795 | M2659378      | AUTO_162 | training set | Inactive | <i>Anabaena sp.</i>                    |
| Titanium dioxide                 | O=[Ti]=O.<br>O=[Ti]=O                 | R9879036  | M2645228      | AUTO_3   | training set | Inactive | <i>Daphnia magna</i>                   |
| Titanium dioxide                 | O=[Ti]=O.<br>O=[Ti]=O                 | R9889045  | M2645228      | AUTO_2   | training set | Inactive | <i>Daphnia magna</i>                   |
| Titanium dioxide                 | O=[Ti]=O.<br>O=[Ti]=O                 | R9727616  | M2645228      | AUTO_4   | training set | Inactive | <i>Pseudokirchneriella subcapitata</i> |
| Iron                             | [Fe].[Fe]                             | R21027736 | M8432699<br>1 | AUTO_100 | training set | Inactive | <i>Heterocyprius incongruens</i>       |
| cerium oxide                     | O=[Ce]=O.<br>O=[Ce]=O                 | R9727310  | M2659378      | AUTO_5   | training set | Inactive | <i>Daphnia magna</i>                   |
| cerium oxide                     | O=[Ce]=O.<br>O=[Ce]=O                 | R21027799 | M2659378      | AUTO_166 | training set | Inactive | <i>Anabaena sp.</i>                    |
| Aluminium oxide                  | O=[Al]O[Al]<br>]=O.O=[Al]<br>]O[Al]=O | R21027872 | M2652898      | AUTO_245 | training set | Inactive | <i>Scenedesmus sp.</i>                 |
| Copper(II) oxide                 | O=[Cu].O=<br>[Cu]                     | R21027833 | M2652894      | AUTO_201 | training set | Inactive | <i>Escherichia coli</i>                |
| cerium oxide                     | O=[Ce]=O.<br>O=[Ce]=O                 | R9727309  | M2659378      | AUTO_4   | training set | Inactive | <i>Daphnia magna</i>                   |
| Titanium                         | O=[Ti]=O.                             | R21027857 | M2645228      | AUTO_226 | training set | Inactive | <i>Ceriodaphnia</i>                    |

|                  |                             |           |          |          |              |          |                                        |
|------------------|-----------------------------|-----------|----------|----------|--------------|----------|----------------------------------------|
| dioxide          | O=[Ti]=O                    |           |          |          |              |          | <i>ia dubia</i>                        |
| cerium oxide     | O=[Ce]=O.<br>O=[Ce]=O       | R21027804 | M2659378 | AUTO_171 | training set | Inactive | <i>Anabaena sp.</i>                    |
| cerium oxide     | O=[Ce]=O.<br>O=[Ce]=O       | R21027751 | M2659378 | AUTO_118 | training set | Inactive | <i>Daphnia magna</i>                   |
| Titanium         | O=[Ti]=O.<br>O=[Ti]=O       | R2692103  | M2645228 | AUTO_7   | training set | Inactive | <i>Desmodesmus subspicatus</i>         |
| Titanium dioxide | O=[Ti]=O.<br>O=[Ti]=O       | R9727312  | M2645228 | AUTO_1   | training set | Inactive | <i>Desmodesmus subspicatus</i>         |
| Nickel(II) oxide | O=[Ni].O=[Ni]               | R21027702 | M2652904 | AUTO_66  | training set | Inactive | <i>Chlorella vulgaris</i>              |
| Silver           | [Ag].[Ag]                   | R9889343  | M2645220 | AUTO_4   | training set | Inactive | <i>Danio rerio embryos</i>             |
| Silver           | [Ag].[Ag]                   | R21027771 | M2645220 | AUTO_138 | training set | Inactive | <i>Caenorhabditis elegans</i>          |
| Zinc oxide       | O=[Zn].O=[Zn]               | R21027731 | M2652893 | AUTO_95  | training set | Inactive | <i>Bacillus subtilis</i>               |
| Aluminium oxide  | O=[Al]O[Al]=O.O=[Al]O[Al]=O | R21027856 | M2652898 | AUTO_225 | training set | Inactive | <i>Ceriodaphnia dubia</i>              |
| Aluminium oxide  | O=[Al]O[Al]=O.O=[Al]O[Al]=O | R21027871 | M2652898 | AUTO_244 | training set | Inactive | <i>Chlorella sp.</i>                   |
| Silver           | [Ag].[Ag]                   | R21027685 | M2645220 | AUTO_47  | training set | Inactive | <i>Vibrio fischeri</i>                 |
| cerium oxide     | O=[Ce]=O.<br>O=[Ce]=O       | R21027802 | M2659378 | AUTO_169 | training set | Inactive | <i>Anabaena sp.</i>                    |
| Copper(II) oxide | O=[Cu].O=[Cu]               | R21027834 | M2652894 | AUTO_202 | training set | Inactive | <i>Escherichia coli</i>                |
| Silver           | [Ag].[Ag]                   | R21027765 | M2645220 | AUTO_132 | training set | Inactive | <i>Caenorhabditis elegans</i>          |
| Silver           | [Ag].[Ag]                   | R21027861 | M2645220 | AUTO_234 | training set | Inactive | <i>Pseudomonas putida</i>              |
| Titanium dioxide | O=[Ti]=O.<br>O=[Ti]=O       | R21027852 | M2645228 | AUTO_221 | training set | Inactive | <i>Pseudokirchneriella subcapitata</i> |
| Copper(II) oxide | O=[Cu].O=[Cu]               | R21027835 | M2652894 | AUTO_203 | training set | Inactive | <i>Escherichia coli</i>                |
| Titanium dioxide | O=[Ti]=O.<br>O=[Ti]=O       | R9727609  | M2645228 | AUTO_3   | training set | Inactive | <i>Daphnia similis</i>                 |
| Copper(II) oxide | O=[Cu].O=[Cu]               | R21027899 | M2652894 | AUTO_273 | training set | Inactive | <i>Chlorella sp.</i>                   |
| cerium oxide     | O=[Ce]=O.<br>O=[Ce]=O       | R21027805 | M2659378 | AUTO_172 | training set | Inactive | <i>Anabaena sp.</i>                    |
| Titanium dioxide | O=[Ti]=O.<br>O=[Ti]=O       | R21027714 | M2645228 | AUTO_78  | training set | Inactive | <i>Pseudokirchneriella subcapitata</i> |
| Copper(II) oxide | O=[Cu].O=[Cu]               | R9866157  | M2652894 | AUTO_5   | training set | Inactive | <i>Bacillus subtilis</i>               |
| Copper(II) oxide | O=[Cu].O=[Cu]               | R9866161  | M2652894 | AUTO_9   | training set | Inactive | <i>Streptococcus aureus</i>            |
| Zinc oxide       | O=[Zn].O=[Zn]               | R21027847 | M2652893 | AUTO_215 | training set | Inactive | <i>Escherichia coli</i>                |
| Copper(II) oxide | O=[Cu].O=[Cu]               | R9968657  | M2652894 | AUTO_6   | training set | Inactive | <i>Vibrio fischeri</i>                 |

|                  |                             |           |          |          |              |          |                                        |
|------------------|-----------------------------|-----------|----------|----------|--------------|----------|----------------------------------------|
| Copper(II) oxide | O=[Cu].O=[Cu]               | R21027753 | M2652894 | AUTO_120 | training set | Inactive | <i>Vibrio fischeri</i>                 |
| cerium oxide     | O=[Ce]=O.<br>O=[Ce]=O       | R9727311  | M2659378 | AUTO_6   | training set | Inactive | <i>Daphnia magna</i>                   |
| Titanium dioxide | O=[Ti]=O.<br>O=[Ti]=O       | R9846671  | M2645228 | AUTO_53  | training set | Inactive | <i>Pseudokirchneriella subcapitata</i> |
| Titanium dioxide | O=[Ti]=O.<br>O=[Ti]=O       | R9879035  | M2645228 | AUTO_2   | training set | Inactive | <i>Pseudokirchneriella subcapitata</i> |
| Copper(II) oxide | O=[Cu].O=[Cu]               | R2707701  | M2652894 | AUTO_42  | training set | Inactive | <i>Vibrio fischeri</i>                 |
| Zinc oxide       | O=[Zn].O=[Zn]               | R21027735 | M2652893 | AUTO_99  | training set | Inactive | <i>Escherichia coli</i>                |
| Silver           | [Ag].[Ag]                   | R21027862 | M2645220 | AUTO_235 | training set | Inactive | <i>Pseudomonas putida</i>              |
| Zinc oxide       | O=[Zn].O=[Zn]               | R21027848 | M2652893 | AUTO_216 | training set | Inactive | <i>Escherichia coli</i>                |
| Zinc oxide       | O=[Zn].O=[Zn]               | R9866159  | M2652893 | AUTO_7   | training set | Inactive | <i>Bacillus subtilis</i>               |
| Zinc oxide       | O=[Zn].O=[Zn]               | R21027849 | M2652893 | AUTO_217 | training set | Inactive | <i>Escherichia coli</i>                |
| Titanium dioxide | O=[Ti]=O.<br>O=[Ti]=O       | R21027712 | M2645228 | AUTO_76  | training set | Inactive | <i>Pseudokirchneriella subcapitata</i> |
| Silver           | [Ag].[Ag]                   | R21027863 | M2645220 | AUTO_236 | training set | Inactive | <i>Pseudomonas putida</i>              |
| Zinc oxide       | O=[Zn].O=[Zn]               | R21027850 | M2652893 | AUTO_218 | training set | Inactive | <i>Escherichia coli</i>                |
| Copper(II) oxide | O=[Cu].O=[Cu]               | R10004001 | M2652894 | AUTO_7   | training set | Inactive | <i>Tetrahymena thermophila</i>         |
| Titanium dioxide | O=[Ti]=O.<br>O=[Ti]=O       | R9727610  | M2645228 | AUTO_4   | training set | Inactive | <i>Daphnia similis</i>                 |
| Titanium dioxide | O=[Ti]=O.<br>O=[Ti]=O       | R9727611  | M2645228 | AUTO_5   | training set | Inactive | <i>Daphnia similis</i>                 |
| Titanium dioxide | O=[Ti]=O.<br>O=[Ti]=O       | R9727612  | M2645228 | AUTO_6   | training set | Inactive | <i>Daphnia similis</i>                 |
| Titanium dioxide | O=[Ti]=O.<br>O=[Ti]=O       | R9887906  | M2645228 | AUTO_1   | training set | Inactive | <i>Daphnia magna</i>                   |
| Titanium dioxide | O=[Ti]=O.<br>O=[Ti]=O       | R21027853 | M2645228 | AUTO_222 | training set | Inactive | <i>Pseudokirchneriella subcapitata</i> |
| Silver           | [Ag].[Ag]                   | R21027865 | M2645220 | AUTO_238 | training set | Inactive | <i>Pseudomonas putida</i>              |
| Aluminium oxide  | O=[Al]O[Al]=O.O=[Al]O[Al]=O | R9889044  | M2652898 | AUTO_1   | training set | Inactive | <i>Daphnia magna</i>                   |
| Zinc oxide       | O=[Zn].O=[Zn]               | R21027779 | M2652893 | AUTO_146 | training set | Inactive | <i>Escherichia coli</i>                |
| Titanium dioxide | O=[Ti]=O.<br>O=[Ti]=O       | R21027924 | M2645228 | AUTO_298 | training set | Inactive | <i>Chlorella sp.</i>                   |
| Zinc oxide       | O=[Zn].O=[Zn]               | R9997792  | M2652893 | AUTO_1   | training set | Inactive | <i>Saccharomyces cerevisiae</i>        |
| Zinc oxide       | O=[Zn].O=[Zn]               | R21027918 | M2652893 | AUTO_292 | training set | Inactive | <i>Saccharomyces cerevisiae</i>        |



|                    |                             |           |          |          |              |          |                                        |
|--------------------|-----------------------------|-----------|----------|----------|--------------|----------|----------------------------------------|
| Nickel(II) oxide   | O=[Ni].O=[Ni]               | R9866158  | M2652904 | AUTO_6   | training set | Inactive | <i>Bacillus subtilis</i>               |
| Nickel(II) oxide   | O=[Ni].O=[Ni]               | R21027773 | M2652904 | AUTO_140 | training set | Inactive | <i>Bacillus subtilis</i>               |
| Zinc oxide         | O=[Zn].O=[Zn]               | R9866163  | M2652893 | AUTO_11  | training set | Inactive | <i>Streptococcus aureus</i>            |
| Titanium dioxide   | O=[Ti]=O.<br>O=[Ti]=O       | R21027854 | M2645228 | AUTO_223 | training set | Inactive | <i>Pseudokirchneriella subcapitata</i> |
| Copper(II) oxide   | O=[Cu].O=[Cu]               | R10003997 | M2652894 | AUTO_3   | training set | Inactive | <i>Tetrahymena thermophila</i>         |
| Zinc oxide         | O=[Zn].O=[Zn]               | R9997796  | M2652893 | AUTO_5   | training set | Inactive | <i>Saccharomyces cerevisiae</i>        |
| Zinc oxide         | O=[Zn].O=[Zn]               | R21027919 | M2652893 | AUTO_293 | training set | Inactive | <i>Saccharomyces cerevisiae</i>        |
| Copper(II) oxide   | O=[Cu].O=[Cu]               | R9890172  | M2652894 | AUTO_3   | training set | Inactive | <i>Daphnia magna</i>                   |
| Silver             | [Ag].[Ag]                   | R21027867 | M2645220 | AUTO_240 | training set | Inactive | <i>Pseudomonas putida</i>              |
| Antimony(II) oxide | O=[Sb]O[Sb]=O.O=[Sb]O[Sb]=O | R21027774 | M69142   | AUTO_141 | training set | Inactive | <i>Bacillus subtilis</i>               |
| Titanium dioxide   | O=[Ti]=O.<br>O=[Ti]=O       | R9846672  | M2645228 | AUTO_54  | training set | Inactive | <i>Pseudokirchneriella subcapitata</i> |
| Silver             | [Ag].[Ag]                   | R21027868 | M2645220 | AUTO_241 | training set | Inactive | <i>Pseudomonas putida</i>              |
| Copper(II) oxide   | O=[Cu].O=[Cu]               | R21027748 | M2652894 | AUTO_112 | training set | Inactive | <i>Chlamydomonas reinhardtii</i>       |
| Zinc oxide         | O=[Zn].O=[Zn]               | R9997797  | M2652893 | AUTO_6   | training set | Inactive | <i>Saccharomyces cerevisiae</i>        |
| Copper(II) oxide   | O=[Cu].O=[Cu]               | R21027943 | M2652894 | AUTO_317 | training set | Inactive | <i>Tetrahymena thermophila</i>         |
| Copper(II) oxide   | O=[Cu].O=[Cu]               | R9890171  | M2652894 | AUTO_2   | training set | Inactive | <i>Daphnia magna</i>                   |
| Nickel(II) oxide   | O=[Ni].O=[Ni]               | R21027777 | M2652904 | AUTO_144 | training set | Inactive | <i>Escherichia coli</i>                |
| Copper(II) oxide   | O=[Cu].O=[Cu]               | R21027941 | M2652894 | AUTO_315 | training set | Inactive | <i>Tetrahymena thermophila</i>         |
| Titanium dioxide   | O=[Ti]=O.<br>O=[Ti]=O       | R21027732 | M2645228 | AUTO_96  | training set | Inactive | <i>Escherichia coli</i>                |
| Zinc oxide         | O=[Zn].O=[Zn]               | R21027840 | M2652893 | AUTO_208 | training set | Inactive | <i>Escherichia coli</i>                |
| Silver             | [Ag].[Ag]                   | R21027683 | M2645220 | AUTO_45  | training set | Inactive | <i>Vibrio fischeri</i>                 |
| Zinc oxide         | O=[Zn].O=[Zn]               | R21027841 | M2652893 | AUTO_209 | training set | Inactive | <i>Escherichia coli</i>                |
| Silver             | [Ag].[Ag]                   | R21027870 | M2645220 | AUTO_243 | training set | Inactive | <i>Pseudomonas putida</i>              |

|                     |                                               |           |          |          |              |          |                                        |
|---------------------|-----------------------------------------------|-----------|----------|----------|--------------|----------|----------------------------------------|
| Zinc oxide          | O=[Zn].O=[Zn]                                 | R21027842 | M2652893 | AUTO_210 | training set | Inactive | <i>Escherichia coli</i>                |
| Copper(II) oxide    | O=[Cu].O=[Cu]                                 | R21027752 | M2652894 | AUTO_119 | training set | Inactive | <i>Vibrio fischeri</i>                 |
| Titanium dioxide    | O=[Ti]=O.<br>O=[Ti]=O                         | R21027728 | M2645228 | AUTO_92  | training set | Inactive | <i>Bacillus subtilis</i>               |
| Zinc oxide          | O=[Zn].O=[Zn]                                 | R21027844 | M2652893 | AUTO_212 | training set | Inactive | <i>Escherichia coli</i>                |
| Magnetite           | O=[Fe].O=[Fe].O=[Fe]<br>O[Fe]=O.O=[Fe]O[Fe]=O | R2678284  | M2659379 | AUTO_5   | training set | Inactive | <i>Vibrio fischeri</i>                 |
| Titanium dioxide    | O=[Ti]=O.<br>O=[Ti]=O                         | R9846670  | M2645228 | AUTO_4   | training set | Inactive | <i>Pseudokirchneriella subcapitata</i> |
| Titanium dioxide    | O=[Ti]=O.<br>O=[Ti]=O                         | R9879034  | M2645228 | AUTO_1   | training set | Inactive | <i>Pseudokirchneriella subcapitata</i> |
| Titanium dioxide    | O=[Ti]=O.<br>O=[Ti]=O                         | R21027691 | M2645228 | AUTO_55  | training set | Inactive | <i>Pseudokirchneriella subcapitata</i> |
| Antimony(III) oxide | O=[Sb]O[Sb]=O.O=[Sb]O[Sb]=O                   | R21027778 | M69142   | AUTO_145 | training set | Inactive | <i>Escherichia coli</i>                |
| Titanium dioxide    | O=[Ti]=O.<br>O=[Ti]=O                         | R9889046  | M2645228 | AUTO_3   | training set | Inactive | <i>Daphnia magna</i>                   |
| Titanium dioxide    | O=[Ti]=O.<br>O=[Ti]=O                         | R21027855 | M2645228 | AUTO_224 | training set | Inactive | <i>Pseudokirchneriella subcapitata</i> |
| Silver              | [Ag].[Ag]                                     | R21027822 | M2645220 | AUTO_189 | training set | Inactive | <i>Escherichia coli</i>                |
| Titanium dioxide    | O=[Ti]=O.<br>O=[Ti]=O                         | R21027645 | M2645228 | AUTO_6   | training set | Inactive | <i>Pimephales promelas</i>             |
| Silver              | [Ag].[Ag]                                     | R21027824 | M2645220 | AUTO_192 | training set | Inactive | <i>Escherichia coli</i>                |
| Silver              | [Ag].[Ag]                                     | R21027826 | M2645220 | AUTO_194 | training set | Inactive | <i>Escherichia coli</i>                |
| Titanium dioxide    | O=[Ti]=O.<br>O=[Ti]=O                         | R21027646 | M2645228 | AUTO_7   | training set | Inactive | <i>Pimephales promelas</i>             |
| Zinc oxide          | O=[Zn].O=[Zn]                                 | R9879032  | M2652893 | AUTO_1   | training set | Inactive | <i>Caenorhabditis elegans</i>          |
| Copper(II) oxide    | O=[Cu].O=[Cu]                                 | R9997799  | M2652894 | AUTO_8   | training set | Inactive | <i>Saccharomyces cerevisiae</i>        |
| Copper(II) oxide    | O=[Cu].O=[Cu]                                 | R9968660  | M2652894 | AUTO_9   | training set | Inactive | <i>Xenopus laevis</i>                  |
| Titanium dioxide    | O=[Ti]=O.<br>O=[Ti]=O                         | R9968662  | M2645228 | AUTO_11  | training set | Inactive | <i>Xenopus laevis</i>                  |
| Iron(III) oxide     | O=[Fe].O=[Fe].O=[Fe]<br>O[Fe]=O.O=[Fe]O[Fe]=O | R9968663  | M2659379 | AUTO_12  | training set | Inactive | <i>Xenopus laevis</i>                  |
| Copper(II) oxide    | O=[Cu].O=[Cu]                                 | R9890173  | M2652894 | AUTO_4   | training set | Inactive | <i>Daphnia magna</i>                   |
| Silver              | [Ag].[Ag]                                     | R21027727 | M2645220 | AUTO_91  | training set | Inactive | <i>Tetrahymena</i>                     |

|                  |                       |           |          |          |              |          |                                        |
|------------------|-----------------------|-----------|----------|----------|--------------|----------|----------------------------------------|
|                  |                       |           |          |          |              |          | <i>pyriformis</i>                      |
| Copper(II) oxide | O=[Cu].O=[Cu]         | R10003998 | M2652894 | AUTO_4   | training set | Inactive | <i>Tetrahymena thermophila</i>         |
| Copper(II) oxide | O=[Cu].O=[Cu]         | R10004002 | M2652894 | AUTO_8   | training set | Inactive | <i>Tetrahymena thermophila</i>         |
| Titanium         | O=[Ti]=O.<br>O=[Ti]=O | R2707661  | M2645228 | AUTO_2   | training set | Inactive | <i>Vibrio fischeri</i>                 |
| Titanium dioxide | O=[Ti]=O.<br>O=[Ti]=O | R2707662  | M2645228 | AUTO_3   | training set | Inactive | <i>Vibrio fischeri</i>                 |
| Titanium dioxide | O=[Ti]=O.<br>O=[Ti]=O | R9968661  | M2645228 | AUTO_10  | training set | Inactive | <i>Vibrio fischeri</i>                 |
| Titanium dioxide | O=[Ti]=O.<br>O=[Ti]=O | R9997800  | M2645228 | AUTO_9   | training set | Inactive | <i>Saccharomyces cerevisiae</i>        |
| Silver           | [Ag].[Ag]             | R21027688 | M2645220 | AUTO_50  | test set     | Active   | <i>Daphnia magna</i>                   |
| Silver, colloid  | [Ag].[Ag]             | R9728761  | M2645220 | AUTO_1   | test set     | Active   | <i>Daphnia magna neonates</i>          |
| Silver           | [Ag].[Ag]             | R21027877 | M2645220 | AUTO_250 | test set     | Active   | <i>Daphnia magna</i>                   |
| Silver           | [Ag].[Ag]             | R21027657 | M2645220 | AUTO_19  | test set     | Active   | <i>Daphnia magna</i>                   |
| Silver           | [Ag].[Ag]             | R21027703 | M2645220 | AUTO_67  | test set     | Active   | <i>Daphnia galeata</i>                 |
| Silver           | [Ag].[Ag]             | R21027810 | M2645220 | AUTO_177 | test set     | Active   | <i>Lemna minor</i>                     |
| Silver           | [Ag].[Ag]             | R21027738 | M2645220 | AUTO_102 | test set     | Active   | <i>Pseudokirchneriella subcapitata</i> |
| Zinc oxide       | O=[Zn].O=[Zn]         | R9727614  | M2652893 | AUTO_2   | test set     | Active   | <i>Pseudokirchneriella subcapitata</i> |
| Silver           | [Ag].[Ag]             | R21027885 | M2645220 | AUTO_258 | test set     | Active   | <i>Pseudokirchneriella subcapitata</i> |
| Silver           | [Ag].[Ag]             | R9727599  | M2645220 | AUTO_1   | test set     | Active   | <i>Daphnia magna, freshwater</i>       |
| Zinc oxide       | O=[Zn].O=[Zn]         | R21027707 | M2652893 | AUTO_71  | test set     | Active   | <i>Pseudokirchneriella subcapitata</i> |
| Copper(II) oxide | O=[Cu].O=[Cu]         | R21027676 | M2652894 | AUTO_38  | test set     | Active   | <i>Daphnia magna</i>                   |
| Gold             | [Au].[Au]             | R18891661 | M2660068 | AUTO_5   | test set     | Active   | <i>Zebrafish embryo</i>                |
| Silver           | [Ag].[Ag]             | R21027704 | M2645220 | AUTO_68  | test set     | Active   | <i>Daphnia magna</i>                   |
| Silver           | [Ag].[Ag]             | R2659285  | M2645220 | AUTO_5   | test set     | Active   | <i>Chlamydomonas reinhardtii</i>       |
| Silver           | [Ag].[Ag]             | R21027741 | M2645220 | AUTO_105 | test set     | Active   | <i>Pseudokirchneriella subcapitata</i> |
| Gold             | [Au].[Au]             | R19004350 | M2660068 | AUTO_32  | test set     | Active   | <i>Zebrafish</i>                       |

|                  |                             |           |          |          |          |        |                                        |
|------------------|-----------------------------|-----------|----------|----------|----------|--------|----------------------------------------|
|                  |                             |           |          |          |          |        | <i>embryo</i>                          |
| Silver           | [Ag].[Ag]                   | R21027681 | M2645220 | AUTO_43  | test set | Active | <i>Desmodemus subspicatus</i>          |
| Silver           | [Ag].[Ag]                   | R21027684 | M2645220 | AUTO_46  | test set | Active | <i>Vibrio fischeri</i>                 |
| Samarium oxide   | O=[Sm]O[Sm]=O.O=[Sm]O[Sm]=O | R18891675 | M3728215 | AUTO_25  | test set | Active | <i>Zebrafish embryo</i>                |
| Zinc oxide       | O=[Zn].O=[Zn]               | R9889047  | M2652893 | AUTO_17  | test set | Active | <i>Daphnia magna</i>                   |
| Silver           | [Ag].[Ag]                   | R2659282  | M2645220 | AUTO_2   | test set | Active | <i>Chlamydomonas reinhardtii</i>       |
| Silver           | [Ag].[Ag]                   | R21027762 | M2645220 | AUTO_129 | test set | Active | <i>Caenorhabditis elegans</i>          |
| cerium oxide     | O=[Ce]=O.O=[Ce]=O           | R21027785 | M2659378 | AUTO_152 | test set | Active | <i>Pseudokirchneriella subcapitata</i> |
| Zinc oxide       | O=[Zn].O=[Zn]               | R9728760  | M2652893 | AUTO_4   | test set | Active | <i>Daphnia magna</i>                   |
| Titanium dioxide | O=[Ti]=O.O=[Ti]=O           | R12572775 | M2645228 | AUTO_1   | test set | Active | <i>Daphnia magna</i>                   |
| Silver           | [Ag].[Ag]                   | R21027888 | M2645220 | AUTO_261 | test set | Active | <i>Danio rerio</i>                     |
| Copper(II) oxide | O=[Cu].O=[Cu]               | R21027900 | M2652894 | AUTO_274 | test set | Active | <i>Saccharomyces cerevisiae</i>        |
| Copper(II) oxide | O=[Cu].O=[Cu]               | R12714721 | M2652894 | AUTO_9   | test set | Active | <i>Daphnia magna</i>                   |
| Silver           | [Ag].[Ag]                   | R21027664 | M2645220 | AUTO_26  | test set | Active | <i>Daphnia magna</i>                   |
| Copper(II) oxide | O=[Cu].O=[Cu]               | R12714715 | M2652894 | AUTO_3   | test set | Active | <i>Daphnia magna</i>                   |
| cerium oxide     | O=[Ce]=O.O=[Ce]=O           | R21027789 | M2659378 | AUTO_156 | test set | Active | <i>Pseudokirchneriella subcapitata</i> |
| Copper(II) oxide | O=[Cu].O=[Cu]               | R12714713 | M2652894 | AUTO_1   | test set | Active | <i>Daphnia magna</i>                   |
| Copper(II) oxide | O=[Cu].O=[Cu]               | R12714714 | M2652894 | AUTO_2   | test set | Active | <i>Daphnia magna</i>                   |
| Titanium dioxide | O=[Ti]=O.O=[Ti]=O           | R21027747 | M2645228 | AUTO_111 | test set | Active | <i>Pseudokirchneriella subcapitata</i> |
| Copper(II) oxide | O=[Cu].O=[Cu]               | R21027674 | M2652894 | AUTO_36  | test set | Active | <i>Daphnia magna</i>                   |
| Silver           | [Ag].[Ag]                   | R21027698 | M2645220 | AUTO_62  | test set | Active | <i>Escherichia coli</i>                |
| Zinc oxide       | O=[Zn].O=[Zn]               | R9968653  | M2652893 | AUTO_2   | test set | Active | <i>Vibrio fischeri</i>                 |
| Zinc oxide       | O=[Zn].O=[Zn]               | R9890175  | M2652893 | AUTO_6   | test set | Active | <i>Daphnia magna</i>                   |
| cerium oxide     | O=[Ce]=O.O=[Ce]=O           | R21027724 | M2659378 | AUTO_88  | test set | Active | <i>Pseudokirchneriella subcapitata</i> |
| Zinc oxide       | O=[Zn].O=[Zn]               | R9968652  | M2652893 | AUTO_1   | test set | Active | <i>Vibrio fischeri</i>                 |

|                  |                                 |           |          |          |          |          |                                                   |
|------------------|---------------------------------|-----------|----------|----------|----------|----------|---------------------------------------------------|
| Titanium dioxide | O=[Ti]=O.<br>O=[Ti]=O           | R21027648 | M2645228 | AUTO_9   | test set | Active   | <i>Bacillus licheniformis</i>                     |
| Zinc oxide       | O=[Zn].O=[Zn]                   | R21027845 | M2652893 | AUTO_213 | test set | Active   | <i>Escherichia coli</i>                           |
| cerium oxide     | O=[Ce]=O.<br>O=[Ce]=O           | R21027726 | M2659378 | AUTO_90  | test set | Active   | <i>Pseudokirchneriella subcapitata</i>            |
| Zinc oxide       | O=[Zn].O=[Zn]                   | R10003999 | M2652893 | AUTO_5   | test set | Active   | <i>Tetrahymena thermophila</i>                    |
| Copper(II) oxide | O=[Cu].O=[Cu]                   | R21027837 | M2652894 | AUTO_205 | test set | Active   | <i>Escherichia coli</i>                           |
| Titanium dioxide | O=[Ti]=O.<br>O=[Ti]=O           | R9728764  | M2645228 | AUTO_1   | test set | Active   | <i>Ceriodaphnia dubia</i> ,<br><i>photoperiod</i> |
| Titanium dioxide | O=[Ti]=O.<br>O=[Ti]=O           | R21027643 | M2645228 | AUTO_4   | test set | Active   | <i>Ceriodaphnia dubia</i>                         |
| Copper(II) oxide | O=[Cu].O=[Cu]                   | R21027838 | M2652894 | AUTO_206 | test set | Active   | <i>Escherichia coli</i>                           |
| cerium oxide     | O=[Ce]=O.<br>O=[Ce]=O           | R9727306  | M2659378 | AUTO_113 | test set | Inactive | <i>Pseudokirchneriella subcapitata</i>            |
| Titanium dioxide | O=[Ti]=O.<br>O=[Ti]=O           | R12572779 | M2645228 | AUTO_6   | test set | Inactive | <i>Phaeodactylum tricornutum</i>                  |
| cerium oxide     | O=[Ce]=O.<br>O=[Ce]=O           | R21027782 | M2659378 | AUTO_149 | test set | Inactive | <i>Pseudokirchneriella subcapitata</i>            |
| Zinc oxide       | O=[Zn].O=[Zn]                   | R21027839 | M2652893 | AUTO_207 | test set | Inactive | <i>Escherichia coli</i>                           |
| Titanium dioxide | O=[Ti]=O.<br>O=[Ti]=O           | R21027713 | M2645228 | AUTO_77  | test set | Inactive | <i>Pseudokirchneriella subcapitata</i>            |
| Silver           | [Ag].[Ag]                       | R21027817 | M2645220 | AUTO_184 | test set | Inactive | <i>Escherichia coli</i>                           |
| Silver           | [Ag].[Ag]                       | R21027818 | M2645220 | AUTO_185 | test set | Inactive | <i>Escherichia coli</i>                           |
| Zinc oxide       | O=[Zn].O=[Zn]                   | R21027729 | M2652893 | AUTO_93  | test set | Inactive | <i>Bacillus subtilis</i>                          |
| Zinc oxide       | O=[Zn].O=[Zn]                   | R21027733 | M2652893 | AUTO_97  | test set | Inactive | <i>Escherichia coli</i>                           |
| cerium oxide     | O=[Ce]=O.<br>O=[Ce]=O           | R21027798 | M2659378 | AUTO_165 | test set | Inactive | <i>Anabaena sp.</i>                               |
| cerium oxide     | O=[Ce]=O.<br>O=[Ce]=O           | R21027784 | M2659378 | AUTO_151 | test set | Inactive | <i>Pseudokirchneriella subcapitata</i>            |
| Titanium dioxide | O=[Ti]=O.<br>O=[Ti]=O           | R21027851 | M2645228 | AUTO_219 | test set | Inactive | <i>Pseudokirchneriella subcapitata</i>            |
| Silver           | [Ag].[Ag]                       | R21027859 | M2645220 | AUTO_232 | test set | Inactive | <i>Pseudomonas putida</i>                         |
| Iron(III) oxide  | O=[Fe]O[Fe]<br>=O.O=[Fe]O[Fe]=O | R21027898 | M2652899 | AUTO_272 | test set | Inactive | <i>Danio rerio</i>                                |
| Silver           | [Ag].[Ag]                       | R21027761 | M2645220 | AUTO_128 | test set | Inactive | <i>Caenorhabditis</i>                             |

|                   |                                               |           |          |          |          |          |                                 |
|-------------------|-----------------------------------------------|-----------|----------|----------|----------|----------|---------------------------------|
|                   |                                               |           |          |          |          |          | <i>elegans</i>                  |
| Silver            | [Ag].[Ag]                                     | R21027860 | M2645220 | AUTO_233 | test set | Inactive | <i>Pseudomonas putida</i>       |
| cerium oxide      | O=[Ce]=O.<br>O=[Ce]=O                         | R21027801 | M2659378 | AUTO_168 | test set | Inactive | <i>Anabaena sp.</i>             |
| Silver            | [Ag].[Ag]                                     | R21027823 | M2645220 | AUTO_191 | test set | Inactive | <i>Escherichia coli</i>         |
| Titanium          | O=[Ti]=O.<br>O=[Ti]=O                         | R2692104  | M2645228 | AUTO_8   | test set | Inactive | <i>Desmodesmus subspicatus</i>  |
| Zinc oxide        | O=[Zn].O=[Zn]                                 | R21027911 | M2652893 | AUTO_285 | test set | Inactive | <i>Caenorhabditis elegans</i>   |
| Copper(II) oxide  | O=[Cu].O=[Cu]                                 | R21027772 | M2652894 | AUTO_139 | test set | Inactive | <i>Bacillus subtilis</i>        |
| cerium oxide      | O=[Ce]=O.<br>O=[Ce]=O                         | R21027796 | M2659378 | AUTO_163 | test set | Inactive | <i>Anabaena sp.</i>             |
| Copper(II) oxide  | O=[Cu].O=[Cu]                                 | R9968659  | M2652894 | AUTO_8   | test set | Inactive | <i>Vibrio fischeri</i>          |
| Zinc oxide        | O=[Zn].O=[Zn]                                 | R21027775 | M2652893 | AUTO_142 | test set | Inactive | <i>Bacillus subtilis</i>        |
| Silver            | [Ag].[Ag]                                     | R21027864 | M2645220 | AUTO_237 | test set | Inactive | <i>Pseudomonas putida</i>       |
| Titanium dioxide  | O=[Ti]=O.<br>O=[Ti]=O                         | R9728757  | M2645228 | AUTO_1   | test set | Inactive | <i>Daphnia magna</i>            |
| Zinc oxide        | O=[Zn].O=[Zn]                                 | R9866155  | M2652893 | AUTO_3   | test set | Inactive | <i>Escherichia coli</i>         |
| Nickel(II) oxide  | O=[Ni].O=[Ni]                                 | R9866162  | M2652904 | AUTO_10  | test set | Inactive | <i>Streptococcus aureus</i>     |
| Silver            | [Ag].[Ag]                                     | R21027866 | M2645220 | AUTO_239 | test set | Inactive | <i>Pseudomonas putida</i>       |
| Zinc oxide        | O=[Zn].O=[Zn]                                 | R9997793  | M2652893 | AUTO_2   | test set | Inactive | <i>Saccharomyces cerevisiae</i> |
| Silver            | [Ag].[Ag]                                     | R21027869 | M2645220 | AUTO_242 | test set | Inactive | <i>Pseudomonas putida</i>       |
| Nickel(II) oxide  | O=[Ni].O=[Ni]                                 | R9866154  | M2652904 | AUTO_2   | test set | Inactive | <i>Escherichia coli</i>         |
| Copper(II) oxide  | O=[Cu].O=[Cu]                                 | R9848051  | M2652894 | AUTO_2   | test set | Inactive | <i>Daphnia magna</i>            |
| Copper(II) oxide  | O=[Cu].O=[Cu]                                 | R9968658  | M2652894 | AUTO_7   | test set | Inactive | <i>Vibrio fischeri</i>          |
| Iron(II,III)oxide | O=[Fe].O=[Fe].O=[Fe]<br>O[Fe]=O.O=[Fe]O[Fe]=O | R21027678 | M2659379 | AUTO_40  | test set | Inactive | <i>Vibrio fischeri</i>          |
| Titanium dioxide  | O=[Ti]=O.<br>O=[Ti]=O                         | R12572783 | M2645228 | AUTO_10  | test set | Inactive | <i>Brachionus plicatilis</i>    |
| Silver            | [Ag].[Ag]                                     | R21027686 | M2645220 | AUTO_48  | test set | Inactive | <i>Vibrio fischeri</i>          |
| Zinc oxide        | O=[Zn].O=[Zn]                                 | R21027910 | M2652893 | AUTO_284 | test set | Inactive | <i>Caenorhabditis elegans</i>   |
| Copper(II) oxide  | O=[Cu].O=[Cu]                                 | R9997795  | M2652894 | AUTO_4   | test set | Inactive | <i>Saccharomyces cerevisiae</i> |
| Copper(II) oxide  | O=[Cu].O=[Cu]                                 | R2707700  | M2652894 | AUTO_41  | test set | Inactive | <i>Vibrio fischeri</i>          |

|                  |                       |          |          |         |          |          |                                 |
|------------------|-----------------------|----------|----------|---------|----------|----------|---------------------------------|
| Titanium dioxide | O=[Ti]=O.<br>O=[Ti]=O | R9997801 | M2645228 | AUTO_10 | test set | Inactive | <i>Saccharomyces cerevisiae</i> |
|------------------|-----------------------|----------|----------|---------|----------|----------|---------------------------------|

245

246

Table S9. Detailed information of the MIC data used for building nano-SARs

| Information of nanoparticles in the Online Chemical Modeling Environment (OCHEM) platform |           |                    |                      |                       | Sub-dataset  | Classification (threshold value 10.0 mg/L) | Species tested                                            |
|-------------------------------------------------------------------------------------------|-----------|--------------------|----------------------|-----------------------|--------------|--------------------------------------------|-----------------------------------------------------------|
| Material Nanoparticles of Elements                                                        | SMILES    | RECORD ID in OCHEM | MOLECULE ID in OCHEM | Identifier in article |              |                                            |                                                           |
| Silver                                                                                    | [Ag].[Ag] | R21027989          | M2645220             | AUTO_49               | training set | Active                                     | <i>Nitrosomonas europaea</i>                              |
| Silver                                                                                    | [Ag].[Ag] | R2644427           | M2645220             | AUTO_4                | training set | Active                                     | <i>Escherichia coli</i> CCM 3954                          |
| Silver                                                                                    | [Ag].[Ag] | R2644428           | M2645220             | AUTO_5                | training set | Active                                     | <i>Pseudomonas aeruginosa</i> CCM 3955                    |
| Silver                                                                                    | [Ag].[Ag] | R2644429           | M2645220             | AUTO_6                | training set | Active                                     | <i>Pseudomonas aeruginosa</i>                             |
| Silver                                                                                    | [Ag].[Ag] | R2644431           | M2645220             | AUTO_8                | training set | Active                                     | <i>Staphylococcus epidermidis</i> methicillin-resistant   |
| Silver                                                                                    | [Ag].[Ag] | R2644432           | M2645220             | AUTO_9                | training set | Active                                     | <i>Staphylococcus aureus</i> MRSA                         |
| Silver                                                                                    | [Ag].[Ag] | R2644450           | M2645220             | AUTO_27               | training set | Active                                     | <i>Staphylococcus epidermidis</i> methicillin-susceptible |
| Silver                                                                                    | [Ag].[Ag] | R2644425           | M2645220             | AUTO_2                | training set | Active                                     | <i>Enterococcus faecalis</i> CCM 4224                     |
| Silver                                                                                    | [Ag].[Ag] | R2644433           | M2645220             | AUTO_10               | training set | Active                                     | <i>Enterococcus faecium</i> vancomycin-resistant          |
| Silver                                                                                    | [Ag].[Ag] | R2644434           | M2645220             | AUTO_11               | training set | Active                                     | <i>Klebsiella pneumoniae</i> ESBL                         |
| Silver                                                                                    | [Ag].[Ag] | R2644437           | M2645220             | AUTO_14               | training set | Active                                     | <i>Escherichia coli</i> CCM 3954                          |
| Silver                                                                                    | [Ag].[Ag] | R2644440           | M2645220             | AUTO_17               | training set | Active                                     | <i>Staphylococcus epidermidis</i> methicillin-susceptible |
| Silver                                                                                    | [Ag].[Ag] | R2644446           | M2645220             | AUTO_23               | training set | Active                                     | <i>Staphylococcus aureus</i> CCM 3953                     |
| Silver                                                                                    | [Ag].[Ag] | R2644447           | M2645220             | AUTO_24               | training set | Active                                     | <i>Escherichia</i>                                        |



|        |           |           |          |         |              |        |                                                           |
|--------|-----------|-----------|----------|---------|--------------|--------|-----------------------------------------------------------|
|        |           |           |          |         |              |        | <i>coli CCM 3954</i>                                      |
| Silver | [Ag].[Ag] | R2644448  | M2645220 | AUTO_25 | training set | Active | <i>Pseudomonas aeruginosa CCM 3955</i>                    |
| Silver | [Ag].[Ag] | R2644451  | M2645220 | AUTO_28 | training set | Active | <i>Staphylococcus epidermidis methicillin-resistant</i>   |
| Silver | [Ag].[Ag] | R2644457  | M2645220 | AUTO_34 | training set | Active | <i>Escherichia coli CCM 3954</i>                          |
| Silver | [Ag].[Ag] | R2644459  | M2645220 | AUTO_36 | training set | Active | <i>Pseudomonas aeruginosa</i>                             |
| Silver | [Ag].[Ag] | R2644460  | M2645220 | AUTO_37 | training set | Active | <i>Staphylococcus epidermidis methicillin-susceptible</i> |
| Silver | [Ag].[Ag] | R2644461  | M2645220 | AUTO_38 | training set | Active | <i>Staphylococcus epidermidis methicillin-resistant</i>   |
| Silver | [Ag].[Ag] | R2644469  | M2645220 | AUTO_46 | training set | Active | <i>Pseudomonas aeruginosa</i>                             |
| Silver | [Ag].[Ag] | R2644470  | M2645220 | AUTO_47 | training set | Active | <i>Staphylococcus epidermidis methicillin-susceptible</i> |
| Silver | [Ag].[Ag] | R2644471  | M2645220 | AUTO_48 | training set | Active | <i>Staphylococcus epidermidis methicillin-resistant</i>   |
| Silver | [Ag].[Ag] | R2644472  | M2645220 | AUTO_49 | training set | Active | <i>Staphylococcus aureus MRSA</i>                         |
| Silver | [Ag].[Ag] | R2650100  | M2645220 | AUTO_21 | training set | Active | <i>Staphylococcus epidermidis methicillin-resistant</i>   |
| Silver | [Ag].[Ag] | R21027983 | M2645220 | AUTO_41 | training set | Active | <i>Staphylococcus aureus</i>                              |
| Silver | [Ag].[Ag] | R21027972 | M2645220 | AUTO_26 | training set | Active | <i>Salmonella sp.</i>                                     |
| Silver | [Ag].[Ag] | R21027963 | M2645220 | AUTO_17 | training set | Active | <i>Escherichia coli</i>                                   |
| Silver | [Ag].[Ag] | R21027971 | M2645220 | AUTO_25 | training set | Active | <i>Salmonella sp.</i>                                     |
| Silver | [Ag].[Ag] | R21027984 | M2645220 | AUTO_42 | training set | Active | <i>Staphylococcus aureus</i>                              |
| Silver | [Ag].[Ag] | R2644436  | M2645220 | AUTO_13 | training set | Active | <i>Staphylococcus aureus</i>                              |

|        |           |           |          |         |              |        |                                                     |
|--------|-----------|-----------|----------|---------|--------------|--------|-----------------------------------------------------|
|        |           |           |          |         |              |        | CCM 3953                                            |
| Silver | [Ag].[Ag] | R2644438  | M2645220 | AUTO_15 | training set | Active | <i>Pseudomonas aeruginosa</i><br>CCM 3955           |
| Silver | [Ag].[Ag] | R2644442  | M2645220 | AUTO_19 | training set | Active | <i>Staphylococcus aureus</i><br>MRSA                |
| Silver | [Ag].[Ag] | R2644445  | M2645220 | AUTO_22 | training set | Active | <i>Enterococcus faecalis</i><br>CCM 4224            |
| Silver | [Ag].[Ag] | R2644449  | M2645220 | AUTO_26 | training set | Active | <i>Pseudomonas aeruginosa</i>                       |
| Silver | [Ag].[Ag] | R2644453  | M2645220 | AUTO_30 | training set | Active | <i>Enterococcus faecium</i><br>vancomycin-resistant |
| Silver | [Ag].[Ag] | R2644458  | M2645220 | AUTO_35 | training set | Active | <i>Pseudomonas aeruginosa</i><br>CCM 3955           |
| Silver | [Ag].[Ag] | R2644462  | M2645220 | AUTO_39 | training set | Active | <i>Staphylococcus aureus</i><br>MRSA                |
| Silver | [Ag].[Ag] | R2644463  | M2645220 | AUTO_40 | training set | Active | <i>Enterococcus faecium</i><br>vancomycin-resistant |
| Silver | [Ag].[Ag] | R2644464  | M2645220 | AUTO_41 | training set | Active | <i>Klebsiella pneumoniae</i><br>ESBL                |
| Silver | [Ag].[Ag] | R2644467  | M2645220 | AUTO_44 | training set | Active | <i>Escherichia coli</i> CCM 3954                    |
| Silver | [Ag].[Ag] | R2644473  | M2645220 | AUTO_50 | training set | Active | <i>Enterococcus faecium</i><br>vancomycin-resistant |
| Silver | [Ag].[Ag] | R2650096  | M2645220 | AUTO_17 | training set | Active | <i>Escherichia coli</i> CCM 3954                    |
| Silver | [Ag].[Ag] | R2650098  | M2645220 | AUTO_19 | training set | Active | <i>Pseudomonas aeruginosa</i>                       |
| Silver | [Ag].[Ag] | R21027953 | M2645220 | AUTO_6  | training set | Active | <i>Escherichia coli</i>                             |
| Silver | [Ag].[Ag] | R21027954 | M2645220 | AUTO_7  | training set | Active | <i>Escherichia coli</i>                             |
| Silver | [Ag].[Ag] | R21027962 | M2645220 | AUTO_15 | training set | Active | <i>Escherichia coli</i>                             |
| Silver | [Ag].[Ag] | R21027964 | M2645220 | AUTO_18 | training set | Active | <i>Escherichia coli</i>                             |
| Silver | [Ag].[Ag] | R21027975 | M2645220 | AUTO_29 | training set | Active | <i>Staphylococcus aureus</i>                        |
| Silver | [Ag].[Ag] | R21027982 | M2645220 | AUTO_39 | training set | Active | <i>Staphylococcus aureus</i>                        |
| Silver | [Ag].[Ag] | R21027990 | M2645220 | AUTO_50 | training set | Active | <i>Pseudomonas stutzeri</i>                         |

|        |           |           |               |         |              |        |                                                              |
|--------|-----------|-----------|---------------|---------|--------------|--------|--------------------------------------------------------------|
| Iron   | [Fe].[Fe] | R21027949 | M8432699<br>1 | AUTO_1  | training set | Active | <i>Escherichia coli</i>                                      |
| Silver | [Ag].[Ag] | R21027981 | M2645220      | AUTO_37 | training set | Active | <i>Staphylococcus aureus</i>                                 |
| Silver | [Ag].[Ag] | R2644435  | M2645220      | AUTO_12 | training set | Active | <i>Enterococcus faecalis</i><br>CCM 4224                     |
| Silver | [Ag].[Ag] | R2644443  | M2645220      | AUTO_20 | training set | Active | <i>Enterococcus faecium</i><br>vancomycin-resistant          |
| Silver | [Ag].[Ag] | R2644444  | M2645220      | AUTO_21 | training set | Active | <i>Klebsiella pneumoniae</i><br>e ESBL                       |
| Silver | [Ag].[Ag] | R2644455  | M2645220      | AUTO_32 | training set | Active | <i>Enterococcus faecalis</i><br>CCM 4224                     |
| Silver | [Ag].[Ag] | R2644465  | M2645220      | AUTO_42 | training set | Active | <i>Enterococcus faecalis</i><br>CCM 4224                     |
| Silver | [Ag].[Ag] | R2644474  | M2645220      | AUTO_51 | training set | Active | <i>Klebsiella pneumoniae</i><br>e ESBL                       |
| Silver | [Ag].[Ag] | R2650081  | M2645220      | AUTO_2  | training set | Active | <i>Staphylococcus aureus</i><br>CCM 3953                     |
| Silver | [Ag].[Ag] | R2650091  | M2645220      | AUTO_12 | training set | Active | <i>Staphylococcus epidermidis</i><br>methicillin-susceptible |
| Silver | [Ag].[Ag] | R2650095  | M2645220      | AUTO_16 | training set | Active | <i>Staphylococcus aureus</i><br>CCM 3953                     |
| Silver | [Ag].[Ag] | R2650097  | M2645220      | AUTO_18 | training set | Active | <i>Pseudomonas aeruginosa</i><br>CCM 3955                    |
| Silver | [Ag].[Ag] | R2650101  | M2645220      | AUTO_22 | training set | Active | <i>Staphylococcus aureus</i><br>MRSA                         |
| Silver | [Ag].[Ag] | R2650105  | M2645220      | AUTO_26 | training set | Active | <i>Staphylococcus aureus</i><br>CCM 3953                     |
| Silver | [Ag].[Ag] | R2650109  | M2645220      | AUTO_30 | training set | Active | <i>Staphylococcus epidermidis</i><br>methicillin-susceptible |
| Silver | [Ag].[Ag] | R2650110  | M2645220      | AUTO_31 | training set | Active | <i>Staphylococcus epidermidis</i><br>methicillin-resistant   |
| Silver | [Ag].[Ag] | R21028005 | M2645220      | AUTO_65 | training set | Active | <i>Staphylococcus aureus</i>                                 |
| Silver | [Ag].[Ag] | R21028008 | M2645220      | AUTO_69 | training set | Active | <i>Staphylococcus aureus</i>                                 |
| Silver | [Ag].[Ag] | R21027960 | M2645220      | AUTO_13 | training set | Active | <i>Escherichia coli</i>                                      |

|            |               |           |          |         |              |          |                                                           |
|------------|---------------|-----------|----------|---------|--------------|----------|-----------------------------------------------------------|
| Silver     | [Ag].[Ag]     | R21027988 | M2645220 | AUTO_48 | training set | Inactive | <i>Azotobacter vinelandii</i>                             |
| Silver     | [Ag].[Ag]     | R21027985 | M2645220 | AUTO_43 | training set | Inactive | <i>Enterococcus faecalis</i>                              |
| Silver     | [Ag].[Ag]     | R21027992 | M2645220 | AUTO_52 | training set | Inactive | <i>Neisseria gonorrhoeae</i>                              |
| Silver     | [Ag].[Ag]     | R2650084  | M2645220 | AUTO_5  | training set | Inactive | <i>Pseudomonas aeruginosa</i>                             |
| Silver     | [Ag].[Ag]     | R2650085  | M2645220 | AUTO_6  | training set | Inactive | <i>Staphylococcus epidermidis methicillin-susceptible</i> |
| Silver     | [Ag].[Ag]     | R2650094  | M2645220 | AUTO_15 | training set | Inactive | <i>Enterococcus faecalis CCM 4224</i>                     |
| Silver     | [Ag].[Ag]     | R2650107  | M2645220 | AUTO_28 | training set | Inactive | <i>Pseudomonas aeruginosa CCM 3955</i>                    |
| Silver     | [Ag].[Ag]     | R2650108  | M2645220 | AUTO_29 | training set | Inactive | <i>Pseudomonas aeruginosa</i>                             |
| Silver     | [Ag].[Ag]     | R21028000 | M2645220 | AUTO_60 | training set | Inactive | <i>Enterococcus faecalis</i>                              |
| Copper     | [Cu].[Cu]     | R21028012 | M2655006 | AUTO_74 | training set | Inactive | <i>Bacillus subtilis</i>                                  |
| Silver     | [Ag].[Ag]     | R2650083  | M2645220 | AUTO_4  | training set | Inactive | <i>Pseudomonas aeruginosa CCM 3955</i>                    |
| Silver     | [Ag].[Ag]     | R2650087  | M2645220 | AUTO_8  | training set | Inactive | <i>Staphylococcus aureus MRSA</i>                         |
| Silver     | [Ag].[Ag]     | R2650088  | M2645220 | AUTO_9  | training set | Inactive | <i>Klebsiella pneumoniae (ESBL-positive)</i>              |
| Silver     | [Ag].[Ag]     | R2650090  | M2645220 | AUTO_11 | training set | Inactive | <i>Pseudomonas aeruginosa</i>                             |
| Silver     | [Ag].[Ag]     | R2650111  | M2645220 | AUTO_32 | training set | Inactive | <i>Staphylococcus aureus MRSA</i>                         |
| Silver     | [Ag].[Ag]     | R21028003 | M2645220 | AUTO_63 | training set | Inactive | <i>Escherichia coli</i>                                   |
| Silver     | [Ag].[Ag]     | R21028004 | M2645220 | AUTO_64 | training set | Inactive | <i>Escherichia coli</i>                                   |
| Silver     | [Ag].[Ag]     | R21028007 | M2645220 | AUTO_68 | training set | Inactive | <i>Staphylococcus aureus</i>                              |
| Zinc oxide | O=[Zn].O=[Zn] | R21027987 | M2652893 | AUTO_47 | training set | Inactive | <i>Sinorhizobium meliloti</i>                             |
| Silver     | [Ag].[Ag]     | R21028011 | M2645220 | AUTO_73 | training set | Inactive | <i>Bacillus subtilis</i>                                  |
| Silver     | [Ag].[Ag]     | R21028013 | M2645220 | AUTO_75 | training set | Inactive | <i>Escherichia coli</i>                                   |
| Silver     | [Ag].[Ag]     | R21027986 | M2645220 | AUTO_44 | training set | Inactive | <i>Enterococcus</i>                                       |

|                  |               |           |               |         |              |          |                                                         |
|------------------|---------------|-----------|---------------|---------|--------------|----------|---------------------------------------------------------|
|                  |               |           |               |         |              |          | <i>us faecalis</i>                                      |
| Silver           | [Ag].[Ag]     | R2650092  | M2645220      | AUTO_13 | training set | Inactive | <i>Staphylococcus epidermidis methicillin-resistant</i> |
| Silver           | [Ag].[Ag]     | R2650093  | M2645220      | AUTO_14 | training set | Inactive | <i>Staphylococcus aureus MRSA</i>                       |
| Silver           | [Ag].[Ag]     | R2650104  | M2645220      | AUTO_25 | training set | Inactive | <i>Enterococcus faecalis CCM 4224</i>                   |
| Silver           | [Ag].[Ag]     | R2650112  | M2645220      | AUTO_33 | training set | Inactive | <i>Enterococcus faecium (VRE)</i>                       |
| Silver           | [Ag].[Ag]     | R21028001 | M2645220      | AUTO_61 | training set | Inactive | <i>Enterococcus faecalis</i>                            |
| Silver           | [Ag].[Ag]     | R21028010 | M2645220      | AUTO_71 | training set | Inactive | <i>Staphylococcus aureus</i>                            |
| Silver           | [Ag].[Ag]     | R21027955 | M2645220      | AUTO_8  | training set | Inactive | <i>Escherichia coli</i>                                 |
| Silver           | [Ag].[Ag]     | R21027966 | M2645220      | AUTO_20 | training set | Inactive | <i>Salmonella sp.</i>                                   |
| Iron             | [Fe].[Fe]     | R21027950 | M8432699<br>1 | AUTO_3  | training set | Inactive | <i>Escherichia coli</i>                                 |
| Silver           | [Ag].[Ag]     | R21028014 | M2645220      | AUTO_76 | training set | Inactive | <i>Escherichia coli</i>                                 |
| Silver           | [Ag].[Ag]     | R21028021 | M2645220      | AUTO_83 | training set | Inactive | <i>Staphylococcus aureus</i>                            |
| Zinc oxide       | O=[Zn].O=[Zn] | R21027999 | M2652893      | AUTO_59 | training set | Inactive | <i>Staphylococcus aureus</i>                            |
| Silver           | [Ag].[Ag]     | R21028015 | M2645220      | AUTO_77 | training set | Inactive | <i>Escherichia coli</i>                                 |
| Copper           | [Cu].[Cu]     | R21028017 | M2655006      | AUTO_79 | training set | Inactive | <i>Escherichia coli</i>                                 |
| Copper           | [Cu].[Cu]     | R21028022 | M2655006      | AUTO_86 | training set | Inactive | <i>Staphylococcus aureus</i>                            |
| Silver           | [Ag].[Ag]     | R21028016 | M2645220      | AUTO_78 | training set | Inactive | <i>Escherichia coli</i>                                 |
| Silver           | [Ag].[Ag]     | R21027969 | M2645220      | AUTO_23 | training set | Inactive | <i>Salmonella sp.</i>                                   |
| Silver           | [Ag].[Ag]     | R21027973 | M2645220      | AUTO_27 | training set | Inactive | <i>Staphylococcus aureus</i>                            |
| Zinc oxide       | O=[Zn].O=[Zn] | R2707679  | M2652893      | AUTO_20 | training set | Inactive | <i>Vibrio fischeri</i>                                  |
| Copper(II) oxide | O=[Cu].O=[Cu] | R2707710  | M2652894      | AUTO_51 | training set | Inactive | <i>Vibrio fischeri</i>                                  |
| Copper           | [Cu].[Cu]     | R21028018 | M2655006      | AUTO_80 | training set | Inactive | <i>Escherichia coli</i>                                 |
| Zinc oxide       | O=[Zn].O=[Zn] | R21028025 | M2652893      | AUTO_91 | training set | Inactive | <i>Vibrio fischeri</i>                                  |
| Copper           | [Cu].[Cu]     | R21028019 | M2655006      | AUTO_81 | training set | Inactive | <i>Escherichia coli</i>                                 |
| Copper           | [Cu].[Cu]     | R21027994 | M2655006      | AUTO_54 | training set | Inactive | <i>Escherichia coli</i>                                 |
| Silver           | [Ag].[Ag]     | R21027976 | M2645220      | AUTO_31 | training set | Inactive | <i>Staphylococcus aureus</i>                            |
| Silver           | [Ag].[Ag]     | R21027979 | M2645220      | AUTO_35 | training set | Inactive | <i>Staphylococcus aureus</i>                            |

|                   |                                               |           |               |         |              |          |                                                           |
|-------------------|-----------------------------------------------|-----------|---------------|---------|--------------|----------|-----------------------------------------------------------|
| Copper            | [Cu].[Cu]                                     | R21028020 | M2655006      | AUTO_82 | training set | Inactive | <i>Escherichia coli</i>                                   |
| Silver            | [Ag].[Ag]                                     | R21027956 | M2645220      | AUTO_9  | training set | Inactive | <i>Escherichia coli</i>                                   |
| Copper            | [Cu].[Cu]                                     | R21027995 | M2655006      | AUTO_55 | training set | Inactive | <i>Escherichia coli</i>                                   |
| Copper            | [Cu].[Cu]                                     | R21027996 | M2655006      | AUTO_56 | training set | Inactive | <i>Escherichia coli</i>                                   |
| Silver            | [Ag].[Ag]                                     | R21027957 | M2645220      | AUTO_10 | training set | Inactive | <i>Escherichia coli</i>                                   |
| Silver            | [Ag].[Ag]                                     | R21027961 | M2645220      | AUTO_14 | training set | Inactive | <i>Escherichia coli</i>                                   |
| Silver            | [Ag].[Ag]                                     | R21027977 | M2645220      | AUTO_32 | training set | Inactive | <i>Staphylococcus aureus</i>                              |
| Silver            | [Ag].[Ag]                                     | R21027978 | M2645220      | AUTO_33 | training set | Inactive | <i>Staphylococcus aureus</i>                              |
| Silver            | [Ag].[Ag]                                     | R21027980 | M2645220      | AUTO_36 | training set | Inactive | <i>Staphylococcus aureus</i>                              |
| Zinc oxide        | O=[Zn].O=[Zn]                                 | R21027997 | M2652893      | AUTO_57 | training set | Inactive | <i>Escherichia coli</i>                                   |
| Iron              | [Fe].[Fe]                                     | R21027952 | M8432699<br>1 | AUTO_5  | training set | Inactive | <i>Escherichia coli</i>                                   |
| Iron(II,III)oxide | O=[Fe].O=[Fe].O=[Fe]<br>O[Fe]=O.O=[Fe]O[Fe]=O | R21028023 | M2659379      | AUTO_89 | training set | Inactive | <i>Escherichia coli</i>                                   |
| Titanium dioxide  | O=[Ti]=O.<br>O=[Ti]=O                         | R2707665  | M2645228      | AUTO_6  | training set | Inactive | <i>Vibrio fischeri</i>                                    |
| Titanium dioxide  | O=[Ti]=O.<br>O=[Ti]=O                         | R2707666  | M2645228      | AUTO_7  | training set | Inactive | <i>Vibrio fischeri</i>                                    |
| Copper(II)oxide   | O=[Cu].O=[Cu]                                 | R21028024 | M2652894      | AUTO_90 | training set | Inactive | <i>Vibrio fischeri</i>                                    |
| Silver            | [Ag].[Ag]                                     | R2644430  | M2645220      | AUTO_7  | test set     | Active   | <i>Staphylococcus epidermidis methicillin-susceptible</i> |
| Silver            | [Ag].[Ag]                                     | R2644426  | M2645220      | AUTO_3  | test set     | Active   | <i>Staphylococcus aureus CCM 3953</i>                     |
| Silver            | [Ag].[Ag]                                     | R2644441  | M2645220      | AUTO_18 | test set     | Active   | <i>Staphylococcus epidermidis methicillin-resistant</i>   |
| Silver            | [Ag].[Ag]                                     | R2644452  | M2645220      | AUTO_29 | test set     | Active   | <i>Staphylococcus aureus MRSA</i>                         |
| Silver            | [Ag].[Ag]                                     | R2644468  | M2645220      | AUTO_45 | test set     | Active   | <i>Pseudomonas aeruginosa CCM 3955</i>                    |
| Silver            | [Ag].[Ag]                                     | R2650099  | M2645220      | AUTO_20 | test set     | Active   | <i>Staphylococcus epidermidis methicillin-susceptible</i> |
| Silver            | [Ag].[Ag]                                     | R21027965 | M2645220      | AUTO_19 | test set     | Active   | <i>Salmonella</i>                                         |

|            |               |           |               |         |          |          |                                                         |
|------------|---------------|-----------|---------------|---------|----------|----------|---------------------------------------------------------|
|            |               |           |               |         |          |          | <i>sp.</i>                                              |
| Silver     | [Ag].[Ag]     | R2644439  | M2645220      | AUTO_16 | test set | Active   | <i>Pseudomonas aeruginosa</i>                           |
| Silver     | [Ag].[Ag]     | R2644456  | M2645220      | AUTO_33 | test set | Active   | <i>Staphylococcus aureus CCM 3953</i>                   |
| Silver     | [Ag].[Ag]     | R2644466  | M2645220      | AUTO_43 | test set | Active   | <i>Staphylococcus aureus CCM 3953</i>                   |
| Silver     | [Ag].[Ag]     | R21028002 | M2645220      | AUTO_62 | test set | Active   | <i>Escherichia coli</i>                                 |
| Silver     | [Ag].[Ag]     | R21027970 | M2645220      | AUTO_24 | test set | Active   | <i>Salmonella sp.</i>                                   |
| Silver     | [Ag].[Ag]     | R21027959 | M2645220      | AUTO_12 | test set | Active   | <i>Escherichia coli</i>                                 |
| Silver     | [Ag].[Ag]     | R2644454  | M2645220      | AUTO_31 | test set | Active   | <i>Klebsiella pneumoniae ESBL</i>                       |
| Silver     | [Ag].[Ag]     | R2650086  | M2645220      | AUTO_7  | test set | Active   | <i>Staphylococcus epidermidis methicillin-resistant</i> |
| Silver     | [Ag].[Ag]     | R2650103  | M2645220      | AUTO_24 | test set | Active   | <i>Klebsiella pneumoniae (ESBL-positive)</i>            |
| Silver     | [Ag].[Ag]     | R21028006 | M2645220      | AUTO_67 | test set | Active   | <i>Staphylococcus aureus</i>                            |
| Silver     | [Ag].[Ag]     | R21027991 | M2645220      | AUTO_51 | test set | Inactive | <i>Neisseria gonorrhoeae</i>                            |
| Silver     | [Ag].[Ag]     | R2650102  | M2645220      | AUTO_23 | test set | Inactive | <i>Enterococcus faecium (VRE)</i>                       |
| Silver     | [Ag].[Ag]     | R2650082  | M2645220      | AUTO_3  | test set | Inactive | <i>Escherichia coli CCM 3954</i>                        |
| Silver     | [Ag].[Ag]     | R2650106  | M2645220      | AUTO_27 | test set | Inactive | <i>Escherichia coli CCM 3954</i>                        |
| Silver     | [Ag].[Ag]     | R21028009 | M2645220      | AUTO_70 | test set | Inactive | <i>Staphylococcus aureus</i>                            |
| Silver     | [Ag].[Ag]     | R2650089  | M2645220      | AUTO_10 | test set | Inactive | <i>Staphylococcus aureus CCM 3953</i>                   |
| Silver     | [Ag].[Ag]     | R2650113  | M2645220      | AUTO_34 | test set | Inactive | <i>Klebsiella pneumoniae (ESBL-positive)</i>            |
| Zinc oxide | O=[Zn].O=[Zn] | R2707680  | M2652893      | AUTO_21 | test set | Inactive | <i>Vibrio fischeri</i>                                  |
| Iron       | [Fe].[Fe]     | R21027951 | M8432699<br>1 | AUTO_4  | test set | Inactive | <i>Escherichia coli</i>                                 |
| Silver     | [Ag].[Ag]     | R21027958 | M2645220      | AUTO_11 | test set | Inactive | <i>Escherichia coli</i>                                 |
| Copper     | [Cu].[Cu]     | R21027993 | M2655006      | AUTO_53 | test set | Inactive | <i>Escherichia coli</i>                                 |

|                  |               |           |          |         |          |          |                               |
|------------------|---------------|-----------|----------|---------|----------|----------|-------------------------------|
| Silver           | [Ag].[Ag]     | R21027974 | M2645220 | AUTO_28 | test set | Inactive | <i>Staphylococcus aureus</i>  |
| Silver           | [Ag].[Ag]     | R21027967 | M2645220 | AUTO_21 | test set | Inactive | <i>Salmonella sp.</i>         |
| Silver           | [Ag].[Ag]     | R21027968 | M2645220 | AUTO_22 | test set | Inactive | <i>Salmonella sp.</i>         |
| Zinc oxide       | O=[Zn].O=[Zn] | R21027998 | M2652893 | AUTO_58 | test set | Inactive | <i>Pseudomonas aeruginosa</i> |
| Copper(II) oxide | O=[Cu].O=[Cu] | R2707709  | M2652894 | AUTO_50 | test set | Inactive | <i>Vibrio fischeri</i>        |

248
